# Supplementary material for: A screen for gene paralogies delineating evolutionary branching order of early Metazoa
Source: bioRxiv preprint, doi:10.1101/704551, version 2 (2019-11-27)
Supplement: Supplemental Table S1 [file 704551_file02.xlsx]

## Sheet: Paralogy groups
Family size	Family #	Sub-family	Tribolium gene ID	Paralogue gene ID	Gene name	Gene description	Num. w/ description	Outcomes (I = INFORMATIVE; N = NOT INFORMATIVE; A = AMBIGUOUS; ND = NOT DETERMINED)
41	1	a	TC014313	TC012289		Glucose transporter type 1-like Protein	3	A: Extremely large protein family
41	1	a	TC013486	TC012289		Glucose transporter type 1-like Protein	3	A: Extremely large protein family
41	1	a	TC012857	TC012289		Glucose transporter type 1-like Protein	3	A: Extremely large protein family
41	1	b	TC033857	TC012289		Facilitated trehalose transporter Tret1-2 homolog-like Protein	28	A: Extremely large protein family
41	1	b	TC015809	TC012289		Facilitated trehalose transporter Tret1-2 homolog-like Protein	28	A: Extremely large protein family
41	1	b	TC014877	TC012289		Facilitated trehalose transporter Tret1-2 homolog-like Protein	28	A: Extremely large protein family
41	1	b	TC014872	TC012289		Facilitated trehalose transporter Tret1-2 homolog-like Protein	28	A: Extremely large protein family
41	1	b	TC015095	TC012289		Facilitated trehalose transporter Tret1-2 homolog-like Protein	28	A: Extremely large protein family
41	1	b	TC012760	TC012289		Facilitated trehalose transporter Tret1-2 homolog-like Protein	28	A: Extremely large protein family
41	1	b	TC012289	TC014313		Facilitated trehalose transporter Tret1-2 homolog-like Protein	28	A: Extremely large protein family
41	1	c	TC034222	TC014313		Facilitated trehalose transporter Tret1-2 homolog-like Protein	28	A: Extremely large protein family
41	1	c	TC032878	TC014313		Facilitated trehalose transporter Tret1-2 homolog-like Protein	28	A: Extremely large protein family
41	1	c	TC008119	TC014313		Facilitated trehalose transporter Tret1-2 homolog-like Protein	28	A: Extremely large protein family
41	1	c	TC007235	TC014313		Facilitated trehalose transporter Tret1-2 homolog-like Protein	28	A: Extremely large protein family
41	1	c	TC000733	TC014313		Facilitated trehalose transporter Tret1-2 homolog-like Protein	28	A: Extremely large protein family
41	1	c	TC003287	TC014313		Facilitated trehalose transporter Tret1-2 homolog-like Protein	28	A: Extremely large protein family
41	1	c	TC003288	TC014313		Facilitated trehalose transporter Tret1-2 homolog-like Protein	28	A: Extremely large protein family
41	1	c	TC003289	TC014313		Facilitated trehalose transporter Tret1-2 homolog-like Protein	28	A: Extremely large protein family
41	1	c	TC009681	TC014313		Facilitated trehalose transporter Tret1-2 homolog-like Protein	28	A: Extremely large protein family
41	1	c	TC009682	TC014313		Facilitated trehalose transporter Tret1-2 homolog-like Protein	28	A: Extremely large protein family
41	1	c	TC009683	TC014313		Facilitated trehalose transporter Tret1-2 homolog-like Protein	28	A: Extremely large protein family
41	1	c	TC012235	TC014313		Facilitated trehalose transporter Tret1-2 homolog-like Protein	28	A: Extremely large protein family
41	1	c	TC012234	TC014313		Facilitated trehalose transporter Tret1-2 homolog-like Protein	28	A: Extremely large protein family
41	1	c	TC012233	TC014313		Facilitated trehalose transporter Tret1-2 homolog-like Protein	28	A: Extremely large protein family
41	1	c	TC012232	TC014313		Facilitated trehalose transporter Tret1-2 homolog-like Protein	28	A: Extremely large protein family
41	1	c	TC012231	TC014313		Facilitated trehalose transporter Tret1-2 homolog-like Protein	28	A: Extremely large protein family
41	1	c	TC012230	TC014313		Facilitated trehalose transporter Tret1-2 homolog-like Protein	28	A: Extremely large protein family
41	1	c	TC012229	TC014313		Facilitated trehalose transporter Tret1-2 homolog-like Protein	28	A: Extremely large protein family
41	1	c	TC012228	TC014313		Facilitated trehalose transporter Tret1-2 homolog-like Protein	28	A: Extremely large protein family
41	1	c	TC012290	TC014313		Facilitated trehalose transporter Tret1-2 homolog-like Protein	28	A: Extremely large protein family
41	1	c	TC012291	TC014313		Facilitated trehalose transporter Tret1-2 homolog-like Protein	28	A: Extremely large protein family
41	1	d	TC001412	TC014313			251	A: Extremely large protein family
41	1	d	TC001413	TC014313			251	A: Extremely large protein family
41	1	d	TC001414	TC014313			251	A: Extremely large protein family
41	1	d	TC033441	TC014313			251	A: Extremely large protein family
41	1	d	TC034160	TC014313			251	A: Extremely large protein family
41	1	d	TC034161	TC014313			251	A: Extremely large protein family
41	1	d	TC034243	TC014313			251	A: Extremely large protein family
41	1	e	TC013484	TC012289			251	A: Extremely large protein family
41	1	e	TC030899	TC012289			251	A: Extremely large protein family
41	1	e	TC033126	TC012289			251	A: Extremely large protein family
36	2	a	TC014795	TC000803		Carboxylic ester hydrolase	11	A: Extremely large protein family
36	2	b	TC031257	TC014795		Esterase P-like Protein	12	A: Extremely large protein family
36	2	b	TC009692	TC014795		Esterase P-like Protein	12	A: Extremely large protein family
36	2	b	TC009693	TC014795		Esterase P-like Protein	12	A: Extremely large protein family
36	2	b	TC005499	TC014795		Esterase P-like Protein	12	A: Extremely large protein family
36	2	b	TC016251	TC014795		Esterase-6-like Protein	12	A: Extremely large protein family
36	2	b	TC033863	TC014795		Esterase-6-like Protein	12	A: Extremely large protein family
36	2	b	TC033626	TC014795		Esterase-6-like Protein	12	A: Extremely large protein family
36	2	b	TC015230	TC014795		Esterase-6-like Protein	12	A: Extremely large protein family
36	2	b	TC013623	TC014795		Esterase-6-like Protein	12	A: Extremely large protein family
36	2	b	TC009690	TC014795		Esterase-6-like Protein	12	A: Extremely large protein family
36	2	b	TC009694	TC014795		Esterase-6-like Protein	12	A: Extremely large protein family
36	2	b	TC009698	TC014795		Esterase-6-like Protein	12	A: Extremely large protein family
36	2	c	TC007922	TC014795		Carboxylic ester hydrolase	11	A: Extremely large protein family
36	2	c	TC015229	TC014795		Carboxylic ester hydrolase	11	A: Extremely large protein family
36	2	c	TC003375	TC014795		Carboxylic ester hydrolase	11	A: Extremely large protein family
36	2	c	TC013193	TC014795		Carboxylic ester hydrolase	11	A: Extremely large protein family
36	2	c	TC014687	TC014795		Carboxylic ester hydrolase	11	A: Extremely large protein family
36	2	c	TC009691	TC014795		Carboxylic ester hydrolase	11	A: Extremely large protein family
36	2	c	TC006241	TC014795		Carboxylic ester hydrolase	11	A: Extremely large protein family
36	2	c	TC012856	TC014795		Carboxylic ester hydrolase	11	A: Extremely large protein family
36	2	c	TC011376	TC014795		Carboxylic ester hydrolase	11	A: Extremely large protein family
36	2	c	TC005190	TC014795		Carboxylic ester hydrolase	11	A: Extremely large protein family
36	2	d	TC033243	TC014795		Neuroligin-1-like Protein	1	A: Extremely large protein family
36	2	d	TC033027	TC014795		Neuroligin-3-like Protein	1	A: Extremely large protein family
36	2	d	TC033026	TC014795		Neuroligin-4, Y-linked-like Protein	1	A: Extremely large protein family
36	2	e	TC033864	TC014795		Acetylcholinesterase-like Protein	2	A: Extremely large protein family
36	2	e	TC009697	TC014795		Acetylcholinesterase-like Protein	2	A: Extremely large protein family
36	2	f	TC010824	TC014795		Gliotactin	1	A: Extremely large protein family
36	2	f	TC007674	TC014795		Neurotactin-like Protein	1	A: Extremely large protein family
36	2	g	TC003379	TC014795		Liver carboxylesterase-like Protein	1	A: Extremely large protein family
36	2	h	TC031398	TC014795		Venom carboxylesterase-6-like Protein	1	A: Extremely large protein family
36	2	i	TC033339	TC014795			251	A: Extremely large protein family
36	2	i	TC033340	TC014795			251	A: Extremely large protein family
36	2	i	TC033627	TC014795			251	A: Extremely large protein family
36	2	i	TC034086	TC014795			251	A: Extremely large protein family
30	3	a	TC011622	TC006460		Solute carrier family 25 member 35-like Protein	1	A: Extremely large protein family
30	3	ab	TC003733	TC006460		Calcium-binding mitochondrial carrier protein Aralar1-like Protein	16	A: Extremely large protein family
30	3	ab	TC011623	TC006460		Calcium-binding mitochondrial carrier protein Aralar1-like Protein	16	A: Extremely large protein family
30	3	ab	TC012854	TC006460		Calcium-binding mitochondrial carrier protein Aralar1-like Protein	16	A: Extremely large protein family
30	3	b	TC033316	TC003733		Calcium-binding mitochondrial carrier protein Aralar1-like Protein	16	A: Extremely large protein family
30	3	b	TC014580	TC003733		Calcium-binding mitochondrial carrier protein Aralar1-like Protein	16	A: Extremely large protein family
30	3	b	TC015070	TC003733		Calcium-binding mitochondrial carrier protein Aralar1-like Protein	16	A: Extremely large protein family
30	3	b	TC004639	TC003733		Calcium-binding mitochondrial carrier protein Aralar1-like Protein	16	A: Extremely large protein family
30	3	b	TC000750	TC003733		Calcium-binding mitochondrial carrier protein Aralar1-like Protein	16	A: Extremely large protein family
30	3	b	TC030731	TC003733		Calcium-binding mitochondrial carrier protein Aralar1-like Protein	16	A: Extremely large protein family
30	3	b	TC013313	TC003733		Calcium-binding mitochondrial carrier protein Aralar1-like Protein	16	A: Extremely large protein family
30	3	b	TC013175	TC003733		Calcium-binding mitochondrial carrier protein Aralar1-like Protein	16	A: Extremely large protein family
30	3	b	TC008692	TC003733		Calcium-binding mitochondrial carrier protein Aralar1-like Protein	16	A: Extremely large protein family
30	3	b	TC006414	TC003733		Calcium-binding mitochondrial carrier protein Aralar1-like Protein	16	A: Extremely large protein family
30	3	b	TC006415	TC003733		Calcium-binding mitochondrial carrier protein Aralar1-like Protein	16	A: Extremely large protein family
30	3	b	TC005561	TC003733		Calcium-binding mitochondrial carrier protein Aralar1-like Protein	16	A: Extremely large protein family
30	3	b	TC032499	TC003733		Calcium-binding mitochondrial carrier protein Aralar1-like Protein	16	A: Extremely large protein family
30	3	c	TC002415	TC003733		ADP,ATP carrier protein-like Protein	4	A: Extremely large protein family
30	3	c	TC000102	TC003733		ADP,ATP carrier protein-like Protein	4	A: Extremely large protein family
30	3	c	TC010013	TC003733		ADP,ATP carrier protein-like Protein	4	A: Extremely large protein family
30	3	c	TC005981	TC003733		ADP,ATP carrier protein-like Protein	4	A: Extremely large protein family
30	3	d	TC007680	TC003733		Congested-like trachea protein	4	A: Extremely large protein family
30	3	d	TC005616	TC003733		Congested-like trachea protein	4	A: Extremely large protein family
30	3	d	TC005615	TC003733		Congested-like trachea protein	4	A: Extremely large protein family
30	3	d	TC012546	TC003733		Congested-like trachea protein	4	A: Extremely large protein family
30	3	e	TC032592	TC003733		Mitoferrin-like Protein	2	A: Extremely large protein family
30	3	e	TC012585	TC003733		Mitoferrin-like Protein	2	A: Extremely large protein family
30	3	f	TC005358	TC003733		Solute carrier family 25 member 38 homolog	1	A: Extremely large protein family
30	3	g	TC031144	TC003733		Solute carrier family 25 member 51-like Protein	1	A: Extremely large protein family
30	3	h	TC006818	TC003733		S-adenosylmethionine mitochondrial carrier protein homolog-like Protein	1	A: Extremely large protein family
27	4	a	TC007128	TC031556			251	A: Extremely large protein family
27	4	b	TC031556	TC007128			251	A: Extremely large protein family
27	4	c	TC034803	TC007128		Glutamate receptor 1-like protein	5	A: Extremely large protein family
27	4	c	TC033173	TC007128		Glutamate receptor 1-like Protein	5	A: Extremely large protein family
27	4	c	TC032204	TC007128		Glutamate receptor 1-like Protein	5	A: Extremely large protein family
27	4	c	TC032202	TC007128		Glutamate receptor 1-like Protein	5	A: Extremely large protein family
27	4	c	TC012818	TC007128		Glutamate receptor 1-like Protein	5	A: Extremely large protein family
27	4	d	TC008841	TC007128		Glutamate receptor 2-like Protein	1	A: Extremely large protein family
27	4	d	TC009986	TC007128		Glutamate receptor ionotropic, delta-1-like Protein	1	A: Extremely large protein family
27	4	d	TC003572	TC007128		Glutamate receptor ionotropic, kainate 3-like Protein	1	A: Extremely large protein family
27	4	e	TC002656	TC007128			251	A: Extremely large protein family
27	4	e	TC003059	TC007128			251	A: Extremely large protein family
27	4	e	TC004067	TC007128			251	A: Extremely large protein family
27	4	e	TC004075	TC007128			251	A: Extremely large protein family
27	4	e	TC004081	TC007128			251	A: Extremely large protein family
27	4	e	TC006171	TC007128			251	A: Extremely large protein family
27	4	e	TC010481	TC007128			251	A: Extremely large protein family
27	4	e	TC015398	TC007128			251	A: Extremely large protein family
27	4	e	TC031051	TC007128			251	A: Extremely large protein family
27	4	e	TC031399	TC007128			251	A: Extremely large protein family
27	4	e	TC031722	TC007128			251	A: Extremely large protein family
27	4	e	TC032489	TC007128			251	A: Extremely large protein family
27	4	e	TC032853	TC007128			251	A: Extremely large protein family
27	4	e	TC033512	TC007128			251	A: Extremely large protein family
27	4	e	TC033589	TC007128			251	A: Extremely large protein family
27	4	e	TC034795	TC007128			251	A: Extremely large protein family
27	4	e	TC035029	TC007128			251	A: Extremely large protein family
21	5	a	TC015052	TC006120		Fatty acyl-CoA reductase	21	A: Extremely large protein family
21	5	b	TC006120	TC015052		Fatty acyl-CoA reductase	21	A: Extremely large protein family
21	5	b	TC005141	TC015052		Fatty acyl-CoA reductase	21	A: Extremely large protein family
21	5	b	TC033959	TC015052		Fatty acyl-CoA reductase	21	A: Extremely large protein family
21	5	b	TC009785	TC015052		Fatty acyl-CoA reductase	21	A: Extremely large protein family
21	5	b	TC033617	TC015052		Fatty acyl-CoA reductase	21	A: Extremely large protein family
21	5	b	TC015753	TC015052		Fatty acyl-CoA reductase	21	A: Extremely large protein family
21	5	b	TC015380	TC015052		Fatty acyl-CoA reductase	21	A: Extremely large protein family
21	5	b	TC015381	TC015052		Fatty acyl-CoA reductase	21	A: Extremely large protein family
21	5	b	TC015341	TC015052		Fatty acyl-CoA reductase	21	A: Extremely large protein family
21	5	b	TC015203	TC015052		Fatty acyl-CoA reductase	21	A: Extremely large protein family
21	5	b	TC015576	TC015052		Fatty acyl-CoA reductase	21	A: Extremely large protein family
21	5	b	TC015051	TC015052		Fatty acyl-CoA reductase	21	A: Extremely large protein family
21	5	b	TC014982	TC015052		Fatty acyl-CoA reductase	21	A: Extremely large protein family
21	5	b	TC000107	TC015052		Fatty acyl-CoA reductase	21	A: Extremely large protein family
21	5	b	TC009833	TC015052		Fatty acyl-CoA reductase	21	A: Extremely large protein family
21	5	b	TC009834	TC015052		Fatty acyl-CoA reductase	21	A: Extremely large protein family
21	5	b	TC010578	TC015052		Fatty acyl-CoA reductase	21	A: Extremely large protein family
21	5	b	TC006096	TC015052		Fatty acyl-CoA reductase	21	A: Extremely large protein family
21	5	b	TC011214	TC015052		Fatty acyl-CoA reductase	21	A: Extremely large protein family
21	5	b	TC011283	TC015052		Fatty acyl-CoA reductase	21	A: Extremely large protein family
21	6	a	TC013546	TC034228		Kinesin-like protein	14	A: Extremely large protein family
21	6	a	TC033224	TC034228		Kinesin-like protein	14	A: Extremely large protein family
21	6	a	TC031474	TC034228		Kinesin-like protein	14	A: Extremely large protein family
21	6	a	TC030775	TC034228		Kinesin-like protein	14	A: Extremely large protein family
21	6	a	TC013592	TC034228		Kinesin-like protein	14	A: Extremely large protein family
21	6	a	TC004751	TC034228		Kinesin-like protein	14	A: Extremely large protein family
21	6	a	TC004752	TC034228		Kinesin-like protein	14	A: Extremely large protein family
21	6	a	TC002763	TC034228		Kinesin-like protein	14	A: Extremely large protein family
21	6	a	TC013058	TC034228		Kinesin-like protein	14	A: Extremely large protein family
21	6	a	TC013493	TC034228		Kinesin-like protein	14	A: Extremely large protein family
21	6	a	TC010949	TC034228		Kinesin-like protein	14	A: Extremely large protein family
21	6	a	TC006544	TC034228		Kinesin-like protein	14	A: Extremely large protein family
21	6	a	TC011608	TC034228		Kinesin-like protein	14	A: Extremely large protein family
21	6	a	TC004397	TC034228		Kinesin-like protein	14	A: Extremely large protein family
21	6	b	TC032803	TC034228		Kinesin-like protein CG14535	1	A: Extremely large protein family
21	6	b	TC007589	TC034228		Kinesin-like protein costa	1	A: Extremely large protein family
21	6	b	TC014244	TC034228		Kinesin-like protein KIF11-B	1	A: Extremely large protein family
21	6	c	TC003759	TC034228		Bipolar kinesin KRP-130-like Protein	1	A: Extremely large protein family
21	6	d	TC004134	TC034228			251	A: Extremely large protein family
21	6	d	TC008263	TC034228			251	A: Extremely large protein family
21	6	d	TC014111	TC034228			251	A: Extremely large protein family
21	7	a	TC006210	TC002367		Putative ATP-dependent RNA helicase Dbp45A-like Protein	3	A: Extremely large protein family
21	7	a	TC007723	TC006210		Putative ATP-dependent RNA helicase Dbp45A-like Protein	3	A: Extremely large protein family
21	7	a	TC015943	TC006210		Putative ATP-dependent RNA helicase Dbp45A-like Protein	3	A: Extremely large protein family
21	7	b	TC009390	TC006210		Putative ATP-dependent RNA helicase DDX27-like Protein	1	A: Extremely large protein family
21	7	c	TC005373	TC006210		Putative ATP-dependent RNA helicase DDX46-like Protein	1	A: Extremely large protein family
21	7	d	TC007938	TC006210		Putative ATP-dependent RNA helicase me31b-like Protein	1	A: Extremely large protein family
21	7	e	TC014753	TC006210		ATP-dependent RNA helicase abstrakt-like Protein	2	A: Extremely large protein family
21	7	e	TC016289	TC006210		ATP-dependent RNA helicase abstrakt-like Protein	2	A: Extremely large protein family
21	7	f	TC013328	TC006210		Belle	1	A: Extremely large protein family
21	7	g	TC002912	TC006210		ATP-dependent RNA helicase bel-like Protein	1	A: Extremely large protein family
21	7	h	TC008987	TC006210		ATP-dependent RNA helicase Ddx1-like Protein	1	A: Extremely large protein family
21	7	i	TC031326	TC006210		ATP-dependent RNA helicase DDX54-like Protein	1	A: Extremely large protein family
21	7	j	TC001089	TC006210		ATP-dependent RNA helicase p62-like Protein	1	A: Extremely large protein family
21	7	k	TC007006	TC006210		ATP-dependent RNA helicase vasa, isoform A-like Protein	1	A: Extremely large protein family
21	7	l	TC003675	TC006210		ATP-dependent RNA helicase WM6-like Protein	2	A: Extremely large protein family
21	7	l	TC014413	TC006210		ATP-dependent RNA helicase WM6-like Protein	2	A: Extremely large protein family
21	7	m	TC000825	TC006210		RNA helicase	4	A: Extremely large protein family
21	7	m	TC001101	TC006210		RNA helicase	4	A: Extremely large protein family
21	7	m	TC006038	TC006210		RNA helicase	4	A: Extremely large protein family
21	7	m	TC016196	TC006210		RNA helicase	4	A: Extremely large protein family
21	7	n	TC009998	TC006210		Eukaryotic initiation factor 4A-like Protein	1	A: Extremely large protein family
19	8	a	TC012362	TC002260		Sodium channel protein Nach-like Protein	3	A: Extremely large protein family
19	8	b	TC015541	TC012362		Sodium channel protein Nach-like Protein	3	A: Extremely large protein family
19	8	b	TC006095	TC012362		Sodium channel protein Nach-like Protein	3	A: Extremely large protein family
19	8	c	TC002260	TC012362		Pickpocket protein 11-like Protein	1	A: Extremely large protein family
19	8	c	TC034728	TC012362		Pickpocket protein 19-like protein	1	A: Extremely large protein family
19	8	c	TC034126	TC012362		Pickpocket protein 28-like Protein	11	A: Extremely large protein family
19	8	c	TC034701	TC012362		Pickpocket protein 28-like protein	11	A: Extremely large protein family
19	8	c	TC033005	TC012362		Pickpocket protein 28-like Protein	11	A: Extremely large protein family
19	8	c	TC034647	TC012362		Pickpocket protein 28-like protein	11	A: Extremely large protein family
19	8	c	TC015087	TC012362		Pickpocket protein 28-like Protein	11	A: Extremely large protein family
19	8	c	TC003563	TC012362		Pickpocket protein 28-like Protein	11	A: Extremely large protein family
19	8	c	TC006574	TC012362		Pickpocket protein 28-like Protein	11	A: Extremely large protein family
19	8	c	TC006575	TC012362		Pickpocket protein 28-like Protein	11	A: Extremely large protein family
19	8	c	TC005542	TC012362		Pickpocket protein 28-like Protein	11	A: Extremely large protein family
19	8	c	TC012955	TC012362		Pickpocket protein 28-like Protein	11	A: Extremely large protein family
19	8	c	TC002095	TC012362		Pickpocket protein 28-like Protein	11	A: Extremely large protein family
19	8	d	TC004432	TC012362			251	A: Extremely large protein family
19	8	d	TC031055	TC012362			251	A: Extremely large protein family
19	8	d	TC034125	TC012362			251	A: Extremely large protein family
17	9	a	TC010990	TC014436		Ras-related protein Rab-3-like Protein	7	A: Extremely large protein family
17	9	ab	TC014436	TC010990		Ras-related protein Rab6-like Protein	4	A: Extremely large protein family
17	9	b	TC013891	TC010990		Ras-related protein Rab-14-like Protein	1	A: Extremely large protein family
17	9	b	TC005229	TC010990		Ras-related protein Rab-26-like Protein	2	A: Extremely large protein family
17	9	b	TC010138	TC010990		Ras-related protein Rab-26-like Protein	2	A: Extremely large protein family
17	9	b	TC015416	TC010990		Ras-related protein Rab-3-like Protein	7	A: Extremely large protein family
17	9	b	TC001149	TC010990		Ras-related protein Rab-3-like Protein	7	A: Extremely large protein family
17	9	b	TC002919	TC010990		Ras-related protein Rab-3-like Protein	7	A: Extremely large protein family
17	9	b	TC014165	TC010990		Ras-related protein Rab-3-like Protein	7	A: Extremely large protein family
17	9	b	TC010038	TC010990		Ras-related protein Rab-3-like Protein	7	A: Extremely large protein family
17	9	b	TC009113	TC010990		Ras-related protein Rab-3-like Protein	7	A: Extremely large protein family
17	9	b	TC001600	TC010990		Ras-related protein Rab6-like Protein	4	A: Extremely large protein family
17	9	b	TC009462	TC010990		Ras-related protein Rab6-like Protein	4	A: Extremely large protein family
17	9	b	TC012436	TC010990		Ras-related protein Rab6-like Protein	4	A: Extremely large protein family
17	9	b	TC034818	TC010990		Ras-related protein Rab-7a	1	A: Extremely large protein family
17	9	b	TC015698	TC010990		Ras-related protein Rab-9A-like Protein	1	A: Extremely large protein family
17	9	c	TC013254	TC010990		Rab-like protein 3	1	A: Extremely large protein family
16	10	a	TC012539	TC002774		Down syndrome cell adhesion molecule	1	A: Extremely large protein family
16	10	b	TC033567	TC002774		Down syndrome cell adhesion molecule-like protein Dscam2	4	A: Extremely large protein family
16	10	b	TC031564	TC002774		Down syndrome cell adhesion molecule-like protein Dscam2	4	A: Extremely large protein family
16	10	b	TC003918	TC002774		Down syndrome cell adhesion molecule-like protein Dscam2	4	A: Extremely large protein family
16	10	b	TC004237	TC002774		Down syndrome cell adhesion molecule-like protein Dscam2	4	A: Extremely large protein family
16	10	c	TC001889	TC002774		Neuroglian	1	A: Extremely large protein family
16	10	d	TC031782	TC002774		Neuroglian-like Protein	2	A: Extremely large protein family
16	10	d	TC012423	TC002774		Neuroglian-like Protein	2	A: Extremely large protein family
16	10	e	TC008292	TC002774		Protein turtle-like Protein	2	A: Extremely large protein family
16	10	e	TC008291	TC002774		Protein turtle-like Protein	2	A: Extremely large protein family
16	10	f	TC031494	TC002774		Contactin-like Protein	1	A: Extremely large protein family
16	10	g	TC007253	TC002774		Fasciclin-2-like Protein	1	A: Extremely large protein family
16	10	h	TC009930	TC002774		Frazzled	1	A: Extremely large protein family
16	10	i	TC007250	TC002774		Interference hedgehog-like Protein	1	A: Extremely large protein family
16	10	j	TC031088	TC002774		Nectin-3-like Protein	1	A: Extremely large protein family
16	10	k	TC012344	TC002774		Protein sidekick-like Protein	1	A: Extremely large protein family
15	11	a	TC010442	TC000614		Proteasome subunit beta type	5	A: Extremely large protein family
15	11	ab	TC000614	TC010442		Proteasome subunit alpha type	7	A: Extremely large protein family
15	11	b	TC008015	TC010442		Proteasome subunit alpha type	7	A: Extremely large protein family
15	11	b	TC004868	TC010442		Proteasome subunit alpha type	7	A: Extremely large protein family
15	11	b	TC000258	TC010442		Proteasome subunit alpha type	7	A: Extremely large protein family
15	11	b	TC014574	TC010442		Proteasome subunit alpha type	7	A: Extremely large protein family
15	11	b	TC008727	TC010442		Proteasome subunit alpha type	7	A: Extremely large protein family
15	11	b	TC008671	TC010442		Proteasome subunit alpha type	7	A: Extremely large protein family
15	11	b	TC015205	TC010442		Proteasome subunit beta type	5	A: Extremely large protein family
15	11	b	TC009049	TC010442		Proteasome subunit beta type	5	A: Extremely large protein family
15	11	b	TC030625	TC010442		Proteasome subunit beta type	5	A: Extremely large protein family
15	11	b	TC008617	TC010442		Proteasome subunit beta type	5	A: Extremely large protein family
15	11	b	TC000069	TC010442		Proteasome subunit beta type-1-like Protein	1	A: Extremely large protein family
15	11	c	TC031599	TC010442		Proteasome subunit beta type-6-like Protein	2	A: Extremely large protein family
15	11	c	TC008665	TC010442		Proteasome subunit beta type-6-like Protein	2	A: Extremely large protein family
14	12	a	TC003653	TC031879			251	A: Extremely large protein family
14	12	ab	TC031879	TC003653			251	A: Extremely large protein family
14	12	b	TC034675	TC003653		Proton-coupled amino acid transporter 4-like protein	6	A: Extremely large protein family
14	12	b	TC032584	TC003653		Proton-coupled amino acid transporter 4-like Protein	6	A: Extremely large protein family
14	12	b	TC008149	TC003653		Proton-coupled amino acid transporter 4-like Protein	6	A: Extremely large protein family
14	12	b	TC008150	TC003653		Proton-coupled amino acid transporter 4-like Protein	6	A: Extremely large protein family
14	12	b	TC007297	TC003653		Proton-coupled amino acid transporter 4-like Protein	6	A: Extremely large protein family
14	12	b	TC002616	TC003653		Proton-coupled amino acid transporter 4-like Protein	6	A: Extremely large protein family
14	12	c	TC031049	TC003653		Proton-coupled amino acid transporter 1-like Protein	3	A: Extremely large protein family
14	12	c	TC031063	TC003653		Proton-coupled amino acid transporter 1-like Protein	3	A: Extremely large protein family
14	12	c	TC002617	TC003653		Proton-coupled amino acid transporter 1-like Protein	3	A: Extremely large protein family
14	12	d	TC015432	TC003653		Putative sodium-coupled neutral amino acid transporter 11-like Protein	1	A: Extremely large protein family
14	12	e	TC031696	TC003653			251	A: Extremely large protein family
14	12	e	TC034996	TC003653			251	A: Extremely large protein family
14	13	a	TC000360	TC004379		Chondroadherin-like Protein	1	A: Extremely large protein family
14	13	b	TC032257	TC004379		Protein slit-like Protein	3	A: Extremely large protein family
14	13	b	TC009455	TC013196		Tartan/capricious-like protein	1	A: Extremely large protein family
14	13	c	TC032124	TC013196		Protein slit-like Protein	3	A: Extremely large protein family
14	13	c	TC015273	TC013196		Protein slit-like Protein	3	A: Extremely large protein family
14	13	cd	TC008070	TC013196		Leucine-rich repeat, immunoglobulin-like domain and transmembrane domain-containing protein 1	1	A: Extremely large protein family
14	13	d	TC003544	TC013196		Chaoptic-like protein	1	A: Extremely large protein family
14	13	d	TC000625	TC013196		Chaoptin-like Protein	2	A: Extremely large protein family
14	13	d	TC008275	TC013196		Chaoptin-like Protein	2	A: Extremely large protein family
14	13	e	TC012241	TC013196		Connectin-like Protein	1	A: Extremely large protein family
14	13	f	TC004895	TC013196		Toll-6	1	A: Extremely large protein family
14	13	g	TC004901	TC013196		Toll-7-like protein	1	A: Extremely large protein family
14	13	h	TC001975	TC013196			251	A: Extremely large protein family
14	13	h	TC014301	TC013196			251	A: Extremely large protein family
13	14	a	TC008974	TC002588		Ubiquitin-conjugating enzyme E2 C-like Protein	1	A: Extremely large protein family
13	14	b	TC005175	TC002588		Ubiquitin-conjugating enzyme E2 N-like Protein	2	A: Extremely large protein family
13	14	b	TC001755	TC002588		Ubiquitin-conjugating enzyme E2 N-like Protein	2	A: Extremely large protein family
13	14	c	TC010380	TC002588		Ubiquitin-conjugating enzyme E2 variant 2-like Protein	1	A: Extremely large protein family
13	14	d	TC013489	TC002588		Ubiquitin-conjugating enzyme E2-17 kDa-like Protein	1	A: Extremely large protein family
13	14	e	TC003477	TC002588		Courtless	1	A: Extremely large protein family
13	14	f	TC014763	TC002588		Protein crossbronx-like Protein	1	A: Extremely large protein family
13	14	g	TC006191	TC002588		SUMO-conjugating enzyme	1	A: Extremely large protein family
13	14	h	TC013062	TC002588		Transmembrane protein 189-like Protein	1	A: Extremely large protein family
13	14	i	TC002937	TC002588		Ubiquitin-conjugating enzyme E2-24 kDa-like Protein	2	A: Extremely large protein family
13	14	ij	TC012100	TC015328		Ubiquitin-conjugating enzyme E2-24 kDa-like Protein	2	A: Extremely large protein family
13	14	j	TC000443	TC015328		Effete	1	A: Extremely large protein family
13	14	k	TC030776	TC015328		Ubiquitin-conjugating enzyme E2Q-like protein CG4502	1	A: Extremely large protein family
13	15	a	TC007205	TC008784		Translation factor GUF1 homolog, mitochondrial	1	A: Extremely large protein family
13	15	ab	TC008784	TC007205		Elongation factor 2-like Protein	3	A: Extremely large protein family
13	15	ab	TC002875	TC007205		Elongation factor 2-like Protein	3	A: Extremely large protein family
13	15	ab	TC006019	TC007205		Elongation factor 2-like Protein	3	A: Extremely large protein family
13	15	b	TC031771	TC007205		Elongation factor 1-alpha 1-like Protein	2	A: Extremely large protein family
13	15	b	TC006729	TC007205		Elongation factor 1-alpha 1-like Protein	2	A: Extremely large protein family
13	15	b	TC003854	TC007205		Elongation factor 1-alpha 2-like Protein	1	A: Extremely large protein family
13	15	b	TC030724	TC007205		Elongation factor G, mitochondrial	1	A: Extremely large protein family
13	15	b	TC011692	TC007205		Elongation factor Tu	1	A: Extremely large protein family
13	15	b	TC007444	TC007205		Eukaryotic translation initiation factor 5B-like Protein	1	A: Extremely large protein family
13	15	b	TC012373	TC007205		GTP-binding protein 1-like Protein	1	A: Extremely large protein family
13	15	b	TC010866	TC007205		GTP-binding protein 2-like Protein	1	A: Extremely large protein family
13	15	b	TC009837	TC007205		Ribosome-releasing factor 2, mitochondrial-like Protein	1	A: Extremely large protein family
13	16	a	TC003871	TC005369		Cyclin-dependent kinase 5 homolog-like Protein	2	A: Extremely large protein family
13	16	ab	TC002523	TC003871		Cyclin-dependent kinase 5 homolog-like Protein	2	A: Extremely large protein family
13	16	c	TC003392	TC003871		Cyclin-dependent kinase 12-like Protein	1	A: Extremely large protein family
13	16	d	TC030613	TC003871		Cyclin-dependent kinase 1-like Protein	3	A: Extremely large protein family
13	16	d	TC008616	TC003871		Cyclin-dependent kinase 1-like Protein	3	A: Extremely large protein family
13	16	d	TC011548	TC006810		Cyclin-dependent kinase 1-like Protein	3	A: Extremely large protein family
13	16	e	TC012666	TC006810		Mitogen-activated protein kinase	1	A: Extremely large protein family
13	16	f	TC003488	TC003871		Serine/threonine-protein kinase PITSLRE-like Protein	3	A: Extremely large protein family
13	16	f	TC012582	TC003871		Serine/threonine-protein kinase PITSLRE-like Protein	3	A: Extremely large protein family
13	16	f	TC012583	TC003871		Serine/threonine-protein kinase PITSLRE-like Protein	3	A: Extremely large protein family
13	16	g	TC011046	TC003871		Cdc2 kinase-like protein	1	A: Extremely large protein family
13	16	h	TC010477	TC003871			251	A: Extremely large protein family
13	16	h	TC031176	TC003871			251	A: Extremely large protein family
13	17	a	TC000986	TC006498		Protein will die slowly-like Protein	3	A: Extremely large protein family
13	17	ab	TC006498	TC000986			251	A: Extremely large protein family
13	17	b	TC015975	TC000986		Protein will die slowly-like Protein	3	A: Extremely large protein family
13	17	c	TC015150	TC000986		WD repeat-containing protein 62-like Protein	1	A: Extremely large protein family
13	17	d	TC032305	TC000986		WD repeat-containing protein 75-like Protein	1	A: Extremely large protein family
13	17	e	TC008972	TC000986		WD repeat-containing protein 7-like Protein	1	A: Extremely large protein family
13	17	f	TC005896	TC000986		POC1 centriolar protein homolog-like Protein	2	A: Extremely large protein family
13	17	g	TC005496	TC000986		Lissencephaly-1 homolog	1	A: Extremely large protein family
13	17	h	TC003673	TC000986		p21-activated protein kinase-interacting protein 1-like	1	A: Extremely large protein family
13	17		TC003293	TC000886		Cirhin-like Protein	1	A: Extremely large protein family
13	17		TC009207	TC009902		POC1 centriolar protein homolog-like Protein	2	A: Extremely large protein family
13	17		TC000886	TC003293		Protein will die slowly-like Protein	3	A: Extremely large protein family
13	17		TC009902	TC009207		Putative cytosolic iron-sulfur protein assembly protein Ciao1-like Protein	1	A: Extremely large protein family
12	18	a	TC031794	TC034769		Protein-tyrosine-phosphatase	1	A: Extremely large protein family
12	18	b	TC004289	TC034769		Tyrosine-protein phosphatase 69D-like Protein	1	A: Extremely large protein family
12	18	c	TC031516	TC034769		Tyrosine-protein phosphatase 99A-like Protein	1	A: Extremely large protein family
12	18	d	TC003342	TC034769		Tyrosine-protein phosphatase Lar-like Protein	1	A: Extremely large protein family
12	18	e	TC005339	TC034769		Tyrosine-protein phosphatase non-receptor type 4-like Protein	1	A: Extremely large protein family
12	18	f	TC015377	TC034769		Tyrosine-protein phosphatase non-receptor type 7-like Protein	1	A: Extremely large protein family
12	18	g	TC000182	TC034769		Tyrosine-protein phosphatase non-receptor type 9-like Protein	1	A: Extremely large protein family
12	18	h	TC009173	TC034769			251	A: Extremely large protein family
12	18	h	TC031894	TC034769			251	A: Extremely large protein family
12	18	h	TC032131	TC034769			251	A: Extremely large protein family
12	18	h	TC033739	TC034769			251	A: Extremely large protein family
12	18	h	TC034393	TC034769			251	A: Extremely large protein family
12	19	a	TC000615	TC003153		TBC domain-containing protein kinase-like protein	1	A: Extremely large protein family
12	19	b	TC003977	TC003153		TBC1 domain family member 13-like Protein	1	A: Extremely large protein family
12	19	c	TC007868	TC003153		TBC1 domain family member 15-like Protein	1	A: Extremely large protein family
12	19	d	TC015972	TC003153		TBC1 domain family member 16-like Protein	1	A: Extremely large protein family
12	19	e	TC015747	TC003153		TBC1 domain family member 1-like Protein	1	A: Extremely large protein family
12	19	f	TC010881	TC003153		TBC1 domain family member 22B-like Protein	1	A: Extremely large protein family
12	19	g	TC014792	TC003153		TBC1 domain family member 25-like Protein	1	A: Extremely large protein family
12	19	h	TC015650	TC003153		Ecotropic viral integration site 5 ortholog-like Protein	2	A: Extremely large protein family
12	19	h	TC010409	TC003153		Ecotropic viral integration site 5 ortholog-like Protein	2	A: Extremely large protein family
12	19	i	TC015686	TC003153		Small G protein signaling modulator 2-like Protein	1	A: Extremely large protein family
12	19	j	TC005163	TC003153		Small G protein signaling modulator 3 homolog-like Protein	1	A: Extremely large protein family
12	19	k	TC006994	TC003153		USP6 N-terminal-like protein	1	A: Extremely large protein family
12	20	a	TC034074	TC033320		Putative inorganic phosphate cotransporter-like Protein	10	A: Extremely large protein family
12	20	a	TC008459	TC033320		Putative inorganic phosphate cotransporter-like Protein	10	A: Extremely large protein family
12	20	a	TC006192	TC033320		Putative inorganic phosphate cotransporter-like Protein	10	A: Extremely large protein family
12	20	a	TC005713	TC033320		Putative inorganic phosphate cotransporter-like Protein	10	A: Extremely large protein family
12	20	a	TC005712	TC033320		Putative inorganic phosphate cotransporter-like Protein	10	A: Extremely large protein family
12	20	a	TC005443	TC033320		Putative inorganic phosphate cotransporter-like Protein	10	A: Extremely large protein family
12	20	a	TC005442	TC033320		Putative inorganic phosphate cotransporter-like Protein	10	A: Extremely large protein family
12	20	a	TC005438	TC033320		Putative inorganic phosphate cotransporter-like Protein	10	A: Extremely large protein family
12	20	a	TC005437	TC033320		Putative inorganic phosphate cotransporter-like Protein	10	A: Extremely large protein family
12	20	a	TC005436	TC033320		Putative inorganic phosphate cotransporter-like Protein	10	A: Extremely large protein family
12	20	b	TC030766	TC033320		Sugar phosphate exchanger 2-like Protein	1	A: Extremely large protein family
12	20	c	TC034169	TC033320			251	A: Extremely large protein family
11	21	a	TC004606	TC015605		Serine/threonine-protein kinase hippo-like Protein	3	A: Extremely large protein family
11	21	ab	TC015605	TC004606		Serine/threonine-protein kinase hippo-like Protein	3	A: Extremely large protein family
11	21	ab	TC014767	TC004606		Serine/threonine-protein kinase hippo-like Protein	3	A: Extremely large protein family
11	21	c	TC008012	TC004606		Serine/threonine-protein kinase PAK mbt-like Protein	2	A: Extremely large protein family
11	21	c	TC010914	TC004606		Serine/threonine-protein kinase PAK mbt-like Protein	2	A: Extremely large protein family
11	21	d	TC034751	TC004606		Putative serine/threonine-protein kinase STE20-like	1	A: Extremely large protein family
11	21	e	TC015606	TC004606		Serine/threonine-protein kinase TAO1-like Protein	1	A: Extremely large protein family
11	21	f	TC014335	TC004606		STE20/SPS1-related proline-alanine-rich protein kinase-like Protein	1	A: Extremely large protein family
11	21	g	TC014568	TC004606		Traf2 and NCK-interacting protein kinase-like Protein	1	A: Extremely large protein family
11	21	h	TC000382	TC004606			251	A: Extremely large protein family
11	21	h	TC002075	TC004606			251	A: Extremely large protein family
11	22	a	TC011192	TC001327		Aldehyde dehydrogenase, mitochondrial-like Protein	1	A: Extremely large protein family
11	22	b	TC034107	TC011192		Aldehyde dehydrogenase	4	A: Extremely large protein family
11	22	b	TC005624	TC011192		Aldehyde dehydrogenase	4	A: Extremely large protein family
11	22	b	TC015979	TC011192		Aldehyde dehydrogenase	4	A: Extremely large protein family
11	22	b	TC015978	TC011192		Aldehyde dehydrogenase	4	A: Extremely large protein family
11	22	c	TC015614	TC011192		10-formyltetrahydrofolate dehydrogenase	1	A: Extremely large protein family
11	22	d	TC015385	TC011192		Delta-1-pyrroline-5-carboxylate dehydrogenase, mitochondrial-like Protein	1	A: Extremely large protein family
11	22	e	TC015980	TC011192		Fatty aldehyde dehydrogenase-like Protein	1	A: Extremely large protein family
11	22	f	TC011254	TC011192		Glutarate-semialdehyde dehydrogenase DavD-like Protein	1	A: Extremely large protein family
11	22	g	TC032736	TC011192		Putative methylmalonate-semialdehyde dehydrogenase [acylating], mitochondrial-like Protein	1	A: Extremely large protein family
11	22	h	TC005191	TC011192			251	A: Extremely large protein family
11	23	a	TC013722	TC033101		Adenylate cyclase type 2-like Protein	2	A: Extremely large protein family
11	23	a	TC030697	TC033101		Adenylate cyclase type 2-like Protein	2	A: Extremely large protein family
11	23	b	TC013718	TC033101		Ca(2+)/calmodulin-responsive adenylate cyclase-like Protein	1	A: Extremely large protein family
11	23	c	TC012082	TC033101		Rutabaga	1	A: Extremely large protein family
11	23	d	TC033927	TC033101		Guanylate cyclase	3	A: Extremely large protein family
11	23	d	TC004747	TC033101		Guanylate cyclase	3	A: Extremely large protein family
11	23	d	TC030736	TC033101		Guanylate cyclase	3	A: Extremely large protein family
11	23	e	TC007475	TC033101		Soluble guanylate cyclase 88E-like Protein	1	A: Extremely large protein family
11	23	f	TC007814	TC033101			251	A: Extremely large protein family
11	23	f	TC013721	TC033101			251	A: Extremely large protein family
11	23	f	TC034156	TC033101			251	A: Extremely large protein family
11	24	a	TC003290	TC007573		U4/U6.U5 tri-snRNP-associated protein 2-like Protein	1	A: Extremely large protein family
11	24	ab	TC007573	TC003290		Ubiquitin carboxyl-terminal hydrolase 7-like Protein	2	A: Extremely large protein family
11	24	ab	TC005316	TC030699		Ubiquitin carboxyl-terminal hydrolase 7-like Protein	2	A: Extremely large protein family
11	24	b	TC002215	TC030699		Ubiquitin carboxyl-terminal hydrolase 30-like Protein	1	A: Extremely large protein family
11	24	c	TC033410	TC030699		Ubiquitin carboxyl-terminal hydrolase 32-like Protein	1	A: Extremely large protein family
11	24	d	TC004831	TC030699		Ubiquitin carboxyl-terminal hydrolase 3-like Protein	1	A: Extremely large protein family
11	24	e	TC006203	TC030699		Ubiquitin carboxyl-terminal hydrolase 43-like Protein	1	A: Extremely large protein family
11	24	f	TC031068	TC030699		Ubiquitin carboxyl-terminal hydrolase 64E-like Protein	1	A: Extremely large protein family
11	24	h	TC009042	TC030699		Ubiquitin carboxyl-terminal hydrolase nonstop-like Protein	1	A: Extremely large protein family
11	24	i	TC000045	TC030699		Ubiquitin-specific protease	1	A: Extremely large protein family
11	24	j	TC003401	TC030699		Ubiquitinyl hydrolase 1	1	A: Extremely large protein family
10	25	a	TC002813	TC005573		Fork head domain-containing protein crocodile-like Protein	1	A: Large protein family
10	25	b	TC013245	TC002813		Fork head	1	A: Large protein family
10	25	c	TC015957	TC002813		Fork head domain-containing protein FD3-like Protein	1	A: Large protein family
10	25	d	TC014185	TC002813		Fork head domain-containing protein FD4-like Protein	1	A: Large protein family
10	25	e	TC005482	TC002813		Forkhead box protein K1-like Protein	1	A: Large protein family
10	25	f	TC032156	TC002813		Forkhead box protein O-like Protein	1	A: Large protein family
10	25	g	TC008062	TC002813		Sloppy-paired	1	A: Large protein family
10	25	h	TC002814	TC002813			251	A: Large protein family
10	25	h	TC005573	TC002813			251	A: Large protein family
10	25	h	TC012532	TC002813			251	A: Large protein family
10	26	a	TC000508	TC032013		Protoporphyrinogen oxidase-like Protein	1	A: Large protein family
10	26	b	TC034772	TC000508		Protein anon-37Cs-like protein	5	A: Large protein family
10	26	b	TC009452	TC000508		Protein anon-37Cs-like Protein	5	A: Large protein family
10	26	b	TC009643	TC000508		Protein anon-37Cs-like Protein	5	A: Large protein family
10	26	b	TC009644	TC000508		Protein anon-37Cs-like Protein	5	A: Large protein family
10	26	b	TC009166	TC000508		Protein anon-37Cs-like Protein	5	A: Large protein family
10	26	c	TC009641	TC000508		Amine oxidase	1	A: Large protein family
10	26	d	TC032013	TC000508		Putative lysine-specific histone demethylase 1-like Protein	1	A: Large protein family
10	26	e	TC033596	TC000508		Putative polyamine oxidase 5-like Protein	1	A: Large protein family
10	26	f	TC004564	TC000508			251	A: Large protein family
10	27	a	TC006624	TC001459		SWI/SNF-related matrix-associated actin-dependent regulator of chromatin subfamily A containing DEAD/H box 1 homolog-like Protein	1	A: Large protein family
10	27	b	TC007199	TC006624		Chromatin-remodeling complex ATPase chain Iswi-like Protein	1	A: Large protein family
10	27	c	TC012058	TC006624		Domino	1	A: Large protein family
10	27	d	TC000677	TC006624		E3 ubiquitin-protein ligase SHPRH-like Protein	1	A: Large protein family
10	27	e	TC013301	TC006624		Helicase ARIP4-like Protein	1	A: Large protein family
10	27	f	TC004111	TC006624		Putative DNA helicase Ino80-like Protein	1	A: Large protein family
10	27	g	TC005832	TC006624		TATA-binding protein-associated factor 172-like Protein	1	A: Large protein family
10	27	h	TC009972	TC006624		Transcription termination factor 2-like Protein	1	A: Large protein family
10	27	i	TC009794	TC006624		Transcriptional regulator ATRX homolog-like Protein	1	A: Large protein family
10	27	j	TC034871	TC006624			251	A: Large protein family
10	28	a	TC014081	TC031420			251	A: Large protein family
10	28	b	TC007799	TC014081		Apoptosis-resistant E3 ubiquitin protein ligase 1-like Protein	1	A: Large protein family
10	28	b	TC008896	TC014081		E3 ubiquitin-protein ligase Nedd-4-like Protein	1	A: Large protein family
10	28	b	TC006704	TC014081		E3 ubiquitin-protein ligase Smurf1-like Protein	1	A: Large protein family
10	28	b	TC014416	TC014081		E3 ubiquitin-protein ligase Su(Dx)-like Protein	1	A: Large protein family
10	28	b	TC010408	TC014081		E3 ubiquitin-protein ligase TRIP12-like Protein	1	A: Large protein family
10	28	b	TC016227	TC014081		Hect domain and RLD 2-like protein	1	A: Large protein family
10	28	b	TC000997	TC014081		Putative E3 ubiquitin-protein ligase HERC4-like Protein	1	A: Large protein family
10	28	b	TC011206	TC014081		Ubiquitin-protein ligase E3A-like Protein	1	A: Large protein family
10	28	b	TC011840	TC014081		Ubiquitin-protein ligase E3B-like Protein	1	A: Large protein family
10	29	a	TC034092	TC014283		Alpha-mannosidase	10	A: Large protein family
10	29	a	TC034093	TC014283		Alpha-mannosidase	10	A: Large protein family
10	29	a	TC006456	TC014283		Alpha-mannosidase	10	A: Large protein family
10	29	a	TC002467	TC014283		Alpha-mannosidase	10	A: Large protein family
10	29	a	TC002466	TC014283		Alpha-mannosidase	10	A: Large protein family
10	29	a	TC002465	TC014283		Alpha-mannosidase	10	A: Large protein family
10	29	a	TC002464	TC014283		Alpha-mannosidase	10	A: Large protein family
10	29	a	TC009186	TC014283		Alpha-mannosidase	10	A: Large protein family
10	29	a	TC006453	TC014283		Alpha-mannosidase	10	A: Large protein family
10	29	a	TC006455	TC014283		Alpha-mannosidase	10	A: Large protein family
9	30	a	TC015542	TC005562		Prestin-like Protein	2	A: Large protein family
9	30	ab	TC004422	TC005562		Prestin-like Protein	2	A: Large protein family
9	30	b	TC005562	TC015542		Sodium-independent sulfate anion transporter-like Protein	7	A: Large protein family
9	30	c	TC034143	TC015542		Sodium-independent sulfate anion transporter-like Protein	7	A: Large protein family
9	30	c	TC034144	TC015542		Sodium-independent sulfate anion transporter-like Protein	7	A: Large protein family
9	30	c	TC034146	TC015542		Sodium-independent sulfate anion transporter-like Protein	7	A: Large protein family
9	30	c	TC005389	TC015542		Sodium-independent sulfate anion transporter-like Protein	7	A: Large protein family
9	30	c	TC005388	TC015542		Sodium-independent sulfate anion transporter-like Protein	7	A: Large protein family
9	30	c	TC005487	TC015542		Sodium-independent sulfate anion transporter-like Protein	7	A: Large protein family
9	31	a	TC033827	TC011289		ADP-ribosylation factor 1-like Protein	4	A: Large protein family
9	31	a	TC012647	TC011289		ADP-ribosylation factor 1-like Protein	4	A: Large protein family
9	31	a	TC012116	TC011289		ADP-ribosylation factor 1-like Protein	4	A: Large protein family
9	31	a	TC012465	TC011289		ADP-ribosylation factor 1-like Protein	4	A: Large protein family
9	31	b	TC034215	TC011289		ADP-ribosylation factor 2-like Protein	1	A: Large protein family
9	31	c	TC004744	TC011289		ADP-ribosylation factor 3-like Protein	1	A: Large protein family
9	31	d	TC008443	TC011289		ADP-ribosylation factor-like protein 1	1	A: Large protein family
9	31	e	TC010041	TC011289		ADP-ribosylation factor-like protein 2	1	A: Large protein family
9	31	f	TC008914	TC011289			251	A: Large protein family
9	32	a	TC015859	TC016281		ATP-binding cassette sub-family A member 5-like Protein	1	A: Large protein family
9	32	ab	TC016281	TC015859		ATP-binding cassette sub-family A member 3-like Protein	8	A: Large protein family
9	32	b	TC031676	TC015859		ATP-binding cassette sub-family A member 3-like Protein	8	A: Large protein family
9	32	b	TC031677	TC015859		ATP-binding cassette sub-family A member 3-like Protein	8	A: Large protein family
9	32	b	TC034365	TC015859		ATP-binding cassette sub-family A member 3-like Protein	8	A: Large protein family
9	32	b	TC033517	TC015859		ATP-binding cassette sub-family A member 3-like Protein	8	A: Large protein family
9	32	b	TC031048	TC015859		ATP-binding cassette sub-family A member 3-like Protein	8	A: Large protein family
9	32	b	TC002280	TC015859		ATP-binding cassette sub-family A member 3-like Protein	8	A: Large protein family
9	32	b	TC002278	TC015859		ATP-binding cassette sub-family A member 3-like Protein	8	A: Large protein family
9	33	a	TC004574	TC013567		S-(hydroxymethyl)glutathione dehydrogenase	1	A: Large protein family
9	33	ab	TC013567	TC004574			251	A: Large protein family
9	33	b	TC033558	TC004574		Prostaglandin reductase 1-like Protein	4	A: Large protein family
9	33	b	TC009289	TC004574		Prostaglandin reductase 1-like Protein	4	A: Large protein family
9	33	b	TC009520	TC004574		Prostaglandin reductase 1-like Protein	4	A: Large protein family
9	33	b	TC009286	TC004574		Prostaglandin reductase 1-like Protein	4	A: Large protein family
9	33	c	TC014689	TC004574		Reticulon-4-interacting protein 1, mitochondrial-like Protein	2	A: Large protein family
9	33	c	TC030683	TC004574		Reticulon-4-interacting protein 1, mitochondrial-like Protein	2	A: Large protein family
9	33	d	TC009106	TC004574		Synaptic vesicle membrane protein VAT-1 homolog-like	1	A: Large protein family
9	34	a	TC007648	TC031489		RNA-binding protein 42-like Protein	1	A: Large protein family
9	34	b	TC000928	TC007648		RNA-binding protein squid-like Protein	1	A: Large protein family
9	34	c	TC031430	TC007648		Heterogeneous nuclear ribonucleoprotein 27C-like Protein	1	A: Large protein family
9	34	d	TC004651	TC007648		Heterogeneous nuclear ribonucleoprotein 87F-like Protein	1	A: Large protein family
9	34	e	TC000185	TC007648		Heterogeneous nuclear ribonucleoprotein Q-like Protein	1	A: Large protein family
9	34	f	TC009608	TC007648		Polyadenylate-binding protein-like Protein	2	A: Large protein family
9	34	f	TC009661	TC007648		Polyadenylate-binding protein-like Protein	2	A: Large protein family
9	34	g	TC001296	TC007648		Putative RNA-binding protein 46-like Protein	1	A: Large protein family
9	34	h	TC001297	TC007648			251	A: Large protein family
9	35	a	TC003226	TC013683		Putative 1-phosphatidylinositol 3-phosphate 5-kinase-like Protein	1	A: Large protein family
9	35	b	TC000969	TC003226		T-complex protein 1 subunit alpha-like Protein	4	A: Large protein family
9	35	b	TC001073	TC003226		T-complex protein 1 subunit alpha-like Protein	4	A: Large protein family
9	35	b	TC000229	TC003226		T-complex protein 1 subunit alpha-like Protein	4	A: Large protein family
9	35	b	TC005004	TC003226		T-complex protein 1 subunit alpha-like Protein	4	A: Large protein family
9	35	c	TC007791	TC003226		T-complex protein 1 subunit delta	1	A: Large protein family
9	35	d	TC009342	TC003226		T-complex protein 1 subunit gamma	1	A: Large protein family
9	35	e	TC007744	TC003226		T-complex protein 1 subunit gamma-like Protein	2	A: Large protein family
9	35	e	TC030760	TC003226		T-complex protein 1 subunit gamma-like Protein	2	A: Large protein family
8	36	a	TC032813	TC007516		Cytoplasmic dynein 2 heavy chain 1-like Protein	1	A: Large protein family
8	36	a	TC008801	TC007516		Dynein heavy chain	1	A: Large protein family
8	36	a	TC034873	TC007516		Dynein heavy chain 2, axonemal-like protein	2	A: Large protein family
8	36	a	TC031238	TC007516		Dynein heavy chain 2, axonemal-like Protein	2	A: Large protein family
8	36	a	TC034619	TC007516		Dynein heavy chain 8, axonemal-like protein	1	A: Large protein family
8	36	a	TC000119	TC007516		Dynein heavy chain, cytoplasmic-like Protein	3	A: Large protein family
8	36	a	TC005485	TC007516		Dynein heavy chain, cytoplasmic-like Protein	3	A: Large protein family
8	36	a	TC010960	TC007516		Dynein heavy chain, cytoplasmic-like Protein	3	A: Large protein family
8	37	a	TC013598	TC003523		Protein disulfide-isomerase	1	A: Large protein family
8	37	b	TC004373	TC003523		Protein disulfide-isomerase A5-like Protein	1	A: Large protein family
8	37	c	TC004723	TC003523		Protein disulfide-isomerase A6-like Protein	1	A: Large protein family
8	37	d	TC002136	TC003523		Protein disulfide-isomerase TMX3-like Protein	1	A: Large protein family
8	37	e	TC004980	TC003523		Protein disulfide-isomerase-like Protein	2	A: Large protein family
8	37	e	TC001643	TC003523		Protein disulfide-isomerase-like Protein	2	A: Large protein family
8	37	f	TC000962	TC003523		Thioredoxin domain-containing protein-like Protein	1	A: Large protein family
8	37	g	TC002424	TC003523		Thioredoxin-related transmembrane protein 1-like Protein	1	A: Large protein family
8	38	a	TC014245	TC001370		Acyl-coenzyme A oxidase	3	A: Large protein family
8	38	a	TC011683	TC001370		Acyl-coenzyme A oxidase	3	A: Large protein family
8	38	a	TC010636	TC001370		Acyl-coenzyme A oxidase	3	A: Large protein family
8	38	b	TC031483	TC001370		Putative medium-chain specific acyl-CoA dehydrogenase, mitochondrial-like Protein	4	A: Large protein family
8	38	b	TC004634	TC001370		Putative medium-chain specific acyl-CoA dehydrogenase, mitochondrial-like Protein	4	A: Large protein family
8	38	b	TC030576	TC001370		Putative medium-chain specific acyl-CoA dehydrogenase, mitochondrial-like Protein	4	A: Large protein family
8	38	b	TC005123	TC001370		Putative medium-chain specific acyl-CoA dehydrogenase, mitochondrial-like Protein	4	A: Large protein family
8	38	c	TC005122	TC001370			251	A: Large protein family
8	39	a	TC001470	TC012218		Ras-like protein 3	3	A: Large protein family
8	39	ab	TC012218	TC001470		Ras-related protein Ral-a-like Protein	1	A: Large protein family
8	39	b	TC003400	TC001470		Ras-like protein 3	3	A: Large protein family
8	39	b	TC008717	TC001470		Ras-like protein 3	3	A: Large protein family
8	39	c	TC033682	TC001470		NF-kappa-B inhibitor-interacting Ras-like protein	1	A: Large protein family
8	39	d	TC008856	TC001470			251	A: Large protein family
8	39	d	TC009270	TC001470			251	A: Large protein family
8	39	d	TC015129	TC001470			251	A: Large protein family
8	40	a	TC002698	TC007190		Thioredoxin reductase 1, mitochondrial-like Protein	2	A: Large protein family
8	40	b	TC007865	TC007190		Thioredoxin reductase 1, mitochondrial-like Protein	2	A: Large protein family
8	40	c	TC007190	TC002698		Putative apoptosis-inducing factor 1, mitochondrial-like Protein	1	A: Large protein family
8	40	d	TC014309	TC002698		Pyridine nucleotide-disulfide oxidoreductase domain-containing protein 1-like Protein	1	A: Large protein family
8	40	e	TC006823	TC002698		Dihydrolipoyl dehydrogenase-like Protein	1	A: Large protein family
8	40	f	TC006048	TC002698		Apoptosis-inducing factor 3-like Protein	1	A: Large protein family
8	40	g	TC034990	TC002698		Dihydrolipoyl dehydrogenase, mitochondrial-like protein	1	A: Large protein family
8	40	h	TC006822	TC002698			251	A: Large protein family
8	41	a	TC014181	TC034303		Tyrosine-protein kinase transmembrane receptor Ror2-like Protein	1	A: Large protein family
8	41	b	TC007370	TC014181		Tyrosine-protein kinase receptor	1	A: Large protein family
8	41	c	TC033957	TC014181		Ephrin type-A receptor 4-B-like Protein	1	A: Large protein family
8	41	d	TC007584	TC014181		Receptor protein-tyrosine kinase	1	A: Large protein family
8	41	e	TC004713	TC014181		Heartless	1	A: Large protein family
8	41	f	TC008648	TC014181		Hopscotch	1	A: Large protein family
8	41	g	TC012783	TC014181		Ret oncogene	1	A: Large protein family
8	41	h	TC031029	TC014181			251	A: Large protein family
8	42	a	TC031473	TC004234		Ubiquitin-like modifier-activating enzyme 1	1	A: Large protein family
8	42	b	TC004234	TC031473			251	A: Large protein family
8	42	c	TC001194	TC031473		Adenylyltransferase and sulfurtransferase MOCS3	1	A: Large protein family
8	42	d	TC003419	TC031473		NEDD8-activating enzyme E1 regulatory subunit	1	A: Large protein family
8	42	e	TC006385	TC031473		Nedd8-activating enzyme E1 regulatory subunit-like Protein	1	A: Large protein family
8	42	f	TC010401	TC031473		Ubiquitin-like modifier-activating enzyme 5	1	A: Large protein family
8	42	g	TC010974	TC031473		Ubiquitin-like modifier-activating enzyme ATG7	1	A: Large protein family
8	42	h	TC002294	TC031473			251	A: Large protein family
8	43	a	TC011171	TC014731		G-protein coupled receptor	1	A: Large protein family
8	43	b	TC034362	TC014731		Neuropeptides capa receptor-like Protein	3	A: Large protein family
8	43	b	TC011318	TC014731		Neuropeptides capa receptor-like Protein	3	A: Large protein family
8	43	b	TC011320	TC014731		Neuropeptides capa receptor-like Protein	3	A: Large protein family
8	43	c	TC005641	TC034574		Neuropeptide Y receptor-like Protein	1	A: Large protein family
8	43	d	TC004716	TC034574		Protein trapped in endoderm-1-like Protein	1	A: Large protein family
8	43	e	TC002497	TC034574		Tachykinin-like peptides receptor 86C	2	A: Large protein family
8	43	f	TC006805	TC011171		Tachykinin-like peptides receptor 86C	2	A: Large protein family
8	44	a	TC034773	TC009571		DNA helicase	5	A: Large protein family
8	44	ab	TC009571	TC034773		DNA helicase	5	A: Large protein family
8	44	b	TC013713	TC034773		DNA helicase	5	A: Large protein family
8	44	c	TC011200	TC002088		DNA helicase	5	A: Large protein family
8	44	c	TC002088	TC011200		DNA helicase	1	A: Large protein family
8	44	d	TC011437	TC034773		DNA replication licensing factor Mcm2-like Protein	2	A: Large protein family
8	44	e	TC000312	TC009331		DNA replication licensing factor Mcm2-like Protein	2	A: Large protein family
8	44	f	TC009331	TC005192		DNA replication licensing factor REC-like Protein	1	A: Large protein family
7	45	a	TC008318	TC030579		Actin-57B-like Protein	1	A: Large protein family
7	45	b	TC006296	TC030579		Actin-5C-like Protein	1	A: Large protein family
7	45	c	TC000144	TC030579		Actin-related protein 2-like Protein	1	A: Large protein family
7	45	d	TC002963	TC030579		Actin-related protein 3-like Protein	1	A: Large protein family
7	45	e	TC034768	TC030579		Actin-related protein 5-like protein	1	A: Large protein family
7	45	f	TC008881	TC030579		Actin-related protein 6-like Protein	1	A: Large protein family
7	45	g	TC001452	TC030579			251	A: Large protein family
7	46	a	TC000522	TC003345		Glutathione S-transferase 1-1-like Protein	1	A: Large protein family
7	46	b	TC006215	TC003345		Glutathione S-transferase D6-like Protein	1	A: Large protein family
7	46	c	TC003873	TC003345		Glutathione S-transferase omega-1-like Protein	1	A: Large protein family
7	46	d	TC000054	TC003345		Glutathione S-transferase omega-2-like Protein	1	A: Large protein family
7	46	e	TC007229	TC003345		Elongation factor 1-gamma-like Protein	1	A: Large protein family
7	46	f	TC009842	TC003345		Putative maleylacetoacetate isomerase 2-like Protein	1	A: Large protein family
7	46	g	TC000055	TC003345			251	A: Large protein family
7	47	a	TC009712	TC004820		Peptidyl-prolyl cis-trans isomerase CWC27 homolog-like Protein	1	A: Large protein family
7	47	b	TC012378	TC004820		Peptidyl-prolyl cis-trans isomerase-like 2	1	A: Large protein family
7	47	c	TC005570	TC004820		Peptidyl-prolyl cis-trans isomerase-like 4	1	A: Large protein family
7	47	d	TC001277	TC004820		Peptidyl-prolyl cis-trans isomerase	4	A: Large protein family
7	47	d	TC014505	TC004820		Peptidyl-prolyl cis-trans isomerase	4	A: Large protein family
7	47	d	TC010612	TC004820		Peptidyl-prolyl cis-trans isomerase	4	A: Large protein family
7	47	e	TC003825	TC009923		Peptidyl-prolyl cis-trans isomerase	4	A: Large protein family
7	48	a	TC009706	TC005884		Heat shock protein 68a	2	A: Large protein family
7	48	ab	TC009126	TC005884		Heat shock protein 68a	2	A: Large protein family
7	48	c	TC004425	TC009706		Heat shock 70 kDa protein cognate 3-like Protein	1	A: Large protein family
7	48	d	TC007793	TC009706		Hypoxia up-regulated protein 1-like Protein	1	A: Large protein family
7	48	e	TC007971	TC009706		Heat shock protein 68-like Protein	3	A: Large protein family
7	48	f	TC033493	TC005884		Heat shock protein 68-like Protein	3	A: Large protein family
7	48	f	TC010172	TC005884		Heat shock protein 68-like Protein	3	A: Large protein family
7	49	a	TC000612	TC009729		Valacyclovir hydrolase-like Protein	1	A: Large protein family
7	49	ab	TC009729	TC000612		1-acylglycerol-3-phosphate O-acyltransferase ABHD5-like Protein	1	A: Large protein family
7	49	c	TC034298	TC000612		Putative serine hydrolase-like Protein	3	A: Large protein family
7	49	c	TC002894	TC000612		Putative serine hydrolase-like Protein	3	A: Large protein family
7	49	c	TC005406	TC000612		Putative serine hydrolase-like Protein	3	A: Large protein family
7	49	d	TC015318	TC000612		Alpha/beta hydrolase domain-containing protein 11-like Protein	1	A: Large protein family
7	49	e	TC001195	TC000612		Epoxide hydrolase 4-like Protein	1	A: Large protein family
7	50	a	TC003351	TC011405		3-hydroxyacyl-CoA dehydrogenase type-2-like Protein	1	A: Large protein family
7	50	a	TC000474	TC011405		D-beta-hydroxybutyrate dehydrogenase, mitochondrial-like Protein	1	A: Large protein family
7	50	a	TC001630	TC011405		Dehydrogenase/reductase SDR family protein 7-like	1	A: Large protein family
7	50	a	TC009495	TC011405		Hydroxysteroid (17-beta) dehydrogenase 4	1	A: Large protein family
7	50	a	TC014627	TC011405		Hydroxysteroid dehydrogenase-like protein 1	1	A: Large protein family
7	50	a	TC008262	TC011405		WW domain-containing oxidoreductase-like Protein	2	A: Large protein family
7	50	a	TC001572	TC011405		WW domain-containing oxidoreductase-like Protein	2	A: Large protein family
7	51	a	TC033550	TC006844		Methionine aminopeptidase	2	A: Large protein family
7	51	a	TC016220	TC006844		Methionine aminopeptidase	2	A: Large protein family
7	51	b	TC014437	TC006844		Xaa-Pro aminopeptidase 1-like Protein	1	A: Large protein family
7	51	c	TC031503	TC006844		Xaa-Pro dipeptidase-like Protein	1	A: Large protein family
7	51	d	TC016224	TC006844		Putative Xaa-Pro aminopeptidase 3-like Protein	1	A: Large protein family
7	51	e	TC004235	TC006844			251	A: Large protein family
7	51	e	TC011562	TC006844			251	A: Large protein family
7	52	a	TC015763	TC005910		LIM domain kinase 1-like Protein	2	A: Large protein family
7	52	b	TC012191	TC015763		LIM domain kinase 1-like Protein	2	A: Large protein family
7	52	c	TC007298	TC015763		Mitogen-activated protein kinase kinase kinase-like Protein	1	A: Large protein family
7	52	d	TC002476	TC015763		Putative mitogen-activated protein kinase kinase kinase 7-like	1	A: Large protein family
7	52	e	TC011404	TC015763		Raf homolog serine/threonine-protein kinase phl-like Protein	1	A: Large protein family
7	52	f	TC005572	TC015763		TGF-beta activated kinase 1	1	A: Large protein family
7	52	g	TC032181	TC015763		Tyrosine-protein kinase Src64B-like Protein	1	A: Large protein family
7	53	a	TC007061	TC008058		Cytochrome P450-like protein	7	A: Large protein family
7	53	ab	TC008058	TC007061		Cytochrome P450-like protein	7	A: Large protein family
7	53	b	TC002721	TC007061		Cytochrome P450-like protein	7	A: Large protein family
7	53	b	TC014125	TC007061		Cytochrome P450-like protein	7	A: Large protein family
7	53	b	TC013681	TC007061		Cytochrome P450-like protein	7	A: Large protein family
7	53	b	TC013680	TC007061		Cytochrome P450-like protein	7	A: Large protein family
7	53	b	TC010423	TC007061		Cytochrome P450-like protein	7	A: Large protein family
7	54	a	TC033257	TC015929		Tubulin glycylase 3A-like Protein	3	A: Large protein family
7	54	a	TC033256	TC015929		Tubulin glycylase 3A-like Protein	3	A: Large protein family
7	54	a	TC007682	TC015929		Tubulin glycylase 3A-like Protein	3	A: Large protein family
7	54	b	TC014517	TC015929		Tubulin polyglutamylase TTLL4-like Protein	2	A: Large protein family
7	54	b	TC030652	TC015929		Tubulin polyglutamylase TTLL4-like Protein	2	A: Large protein family
7	54	c	TC009196	TC015929		Tubulin polyglutamylase TTLL5-like Protein	1	A: Large protein family
7	54	d	TC001075	TC015929		Tubulin polyglutamylase ttll6-like Protein	1	A: Large protein family
6	55	a	TC008934	TC000779		DnaJ homolog subfamily C member 13-like Protein	1	A: Large protein family
6	55	b	TC000779	TC008934		DnaJ homolog subfamily C member 25 homolog-like Protein	1	A: Large protein family
6	55	c	TC014247	TC008934		DnaJ homolog subfamily C member 11-like Protein	1	A: Large protein family
6	55	d	TC002935	TC008934		DnaJ homolog subfamily C member 17-like Protein	1	A: Large protein family
6	55	e	TC001365	TC008934		J domain-containing protein CG6693-like Protein	1	A: Large protein family
6	55	f	TC030769	TC008934		Uncharacterized protein F54F2.9-like Protein	1	A: Large protein family
6	56	a	TC000481	TC013528		Dosage compensation regulator-like Protein	4	A: Large protein family
6	56	a	TC000112	TC013528		Dosage compensation regulator-like Protein	4	A: Large protein family
6	56	a	TC003184	TC013528		Dosage compensation regulator-like Protein	4	A: Large protein family
6	56	a	TC005697	TC013528		Dosage compensation regulator-like Protein	4	A: Large protein family
6	56	b	TC015049	TC013528		Putative ATP-dependent RNA helicase DHX34-like Protein	1	A: Large protein family
6	56	c	TC015731	TC013528		Putative ATP-dependent RNA helicase kurz-like Protein	1	A: Large protein family
6	57	a	TC000461	TC001636		Major facilitator superfamily domain-containing protein 6-like Protein	3	A: Large protein family
6	57	b	TC032010	TC000461		Major facilitator superfamily domain-containing protein 6-like Protein	3	A: Large protein family
6	57	b	TC003434	TC000461		Major facilitator superfamily domain-containing protein 6-like Protein	3	A: Large protein family
6	57	c	TC001636	TC000461			251	A: Large protein family
6	57	c	TC004493	TC000461			251	A: Large protein family
6	57	c	TC007913	TC000461			251	A: Large protein family
6	58	a	TC007143	TC015726		Serine/threonine-protein phosphatase	6	A: Large protein family
6	58	ab	TC015726	TC007143		Serine/threonine-protein phosphatase	6	A: Large protein family
6	58	b	TC008406	TC007143		Serine/threonine-protein phosphatase	6	A: Large protein family
6	58	b	TC000103	TC007143		Serine/threonine-protein phosphatase	6	A: Large protein family
6	58	b	TC005366	TC007143		Serine/threonine-protein phosphatase	6	A: Large protein family
6	58	b	TC011181	TC007143		Serine/threonine-protein phosphatase	6	A: Large protein family
6	59	a	TC004461	TC003942			251	A: Large protein family
6	59	b	TC015124	TC004461		Protein son of sevenless-like Protein	1	A: Large protein family
6	59	c	TC003754	TC004461		Ral guanine nucleotide dissociation stimulator-like 1	1	A: Large protein family
6	59	d	TC011926	TC004461		Rap guanine nucleotide exchange factor 4-like Protein	1	A: Large protein family
6	59	e	TC031501	TC004461		Ras-specific guanine nucleotide-releasing factor 2-like Protein	1	A: Large protein family
6	59	f	TC003942	TC004461			251	A: Large protein family
6	60	a	TC034783	TC003191			251	A: Large protein family
6	60	b	TC007154	TC034783		DNA-binding protein D-ETS-6-like Protein	1	A: Large protein family
6	60	c	TC033444	TC034783		DNA-binding protein Ets97D-like Protein	1	A: Large protein family
6	60	d	TC031968	TC034783		Ecdysone-induced protein 74EF isoform B-like Protein	1	A: Large protein family
6	60	e	TC032178	TC034783		ETS translocation variant 1-like Protein	1	A: Large protein family
6	60	f	TC007831	TC034783			251	A: Large protein family
6	61	a	TC003524	TC005928		Enoyl-CoA delta isomerase 1, mitochondrial-like Protein	1	A: Large protein family
6	61	ab	TC005928	TC003524		Enoyl-CoA hydratase, mitochondrial-like Protein	1	A: Large protein family
6	61	b	TC006270	TC003524		Enoyl-CoA hydratase domain-containing protein 3, mitochondrial-like Protein	1	A: Large protein family
6	61	c	TC011207	TC003524		3-hydroxyisobutyryl-CoA hydrolase, mitochondrial	1	A: Large protein family
6	61	d	TC003878	TC003524		Delta(3,5)-Delta(2,4)-dienoyl-CoA isomerase, mitochondrial-like Protein	1	A: Large protein family
6	61	e	TC001523	TC003524			251	A: Large protein family
6	62	a	TC011343	TC003323		Mitochondrial-processing peptidase subunit alpha-like Protein	1	A: Large protein family
6	62	b	TC003323	TC011343		Cytochrome b-c1 complex subunit 2, mitochondrial-like Protein	1	A: Large protein family
6	62	c	TC000308	TC011343		Insulin-degrading enzyme-like Protein	1	A: Large protein family
6	62	d	TC033415	TC011343		Mitochondrial-processing peptidase subunit beta-like Protein	1	A: Large protein family
6	62	e	TC010168	TC011343			251	A: Large protein family
6	62	e	TC013520	TC011343			251	A: Large protein family
6	63	a	TC030737	TC011772		Cell division cycle protein 16 homolog-like Protein	1	A: Large protein family
6	63	b	TC014483	TC030737		Cell division cycle protein 23 homolog-like Protein	1	A: Large protein family
6	63	c	TC011772	TC030737		Anaphase-promoting complex subunit 7-like Protein	1	A: Large protein family
6	63	d	TC000032	TC014483		Cell division cycle protein 27 homolog-like Protein	1	A: Large protein family
6	63	e	TC006902	TC014483			251	A: Large protein family
6	63	e	TC006903	TC014483			251	A: Large protein family
6	64		TC000582	TC009159		Cdc42 homolog-like Protein	2	A: Large protein family
6	64		TC013187	TC009159		Cdc42 homolog-like Protein	2	A: Large protein family
6	64		TC012343	TC009159		Mitochondrial Rho GTPase	1	A: Large protein family
6	64		TC000581	TC009159		Ras-like GTP-binding protein Rho1	1	A: Large protein family
6	64		TC009158	TC009159		Rho1	1	A: Large protein family
6	64		TC012457	TC009159		Rho-related BTB domain-containing protein 1-like Protein	1	A: Large protein family
6	65	a	TC009264	TC005814		Phosphatidylinositide phosphatase SAC1-like Protein	3	A: Large protein family
6	65	b	TC005814	TC009264		72 kDa inositol polyphosphate 5-phosphatase-like Protein	1	A: Large protein family
6	65	c	TC030617	TC009264		Phosphatidylinositide phosphatase SAC1-like Protein	3	A: Large protein family
6	65	c	TC007753	TC009264		Phosphatidylinositide phosphatase SAC1-like Protein	3	A: Large protein family
6	65	d	TC004712	TC009264		Synaptojanin-1-like Protein	1	A: Large protein family
6	65	e	TC012081	TC009264		Inositol polyphosphate 5-phosphatase OCRL-1-like Protein	1	A: Large protein family
6	66	a	TC030948	TC034516		G-protein coupled receptor 124-like Protein	1	A: Large protein family
6	66	b	TC033520	TC034516		G-protein coupled receptor Mth-like Protein	1	A: Large protein family
6	66	c	TC032502	TC034516		PDF receptor-like Protein	2	A: Large protein family
6	66	c	TC013321	TC034516		PDF receptor-like Protein	2	A: Large protein family
6	66	d	TC010654	TC034516		Putative G-protein coupled receptor Mth-like 1	1	A: Large protein family
6	66	e	TC009370	TC034516		Putative G-protein coupled receptor Mth-like 5	1	A: Large protein family
6	67	a	TC033331	TC016161		Transcription-associated protein 1-like Protein	1	A: Large protein family
6	67	b	TC016161	TC033331		DNA-dependent protein kinase catalytic subunit-like Protein	1	A: Large protein family
6	67	c	TC034040	TC033331		Serine/threonine-protein kinase ATR-like Protein	1	A: Large protein family
6	67	d	TC031024	TC033331		Serine/threonine-protein kinase Smg1-like Protein	1	A: Large protein family
6	67	e	TC008566	TC033331		Serine-protein kinase ATM-like Protein	1	A: Large protein family
6	67	f	TC005546	TC033331		Target of rapamycin-like Protein	1	A: Large protein family
6	68	a	TC033180	TC005186		Dystrophin, isoform D-like Protein	1	A: Large protein family
6	68	ab	TC005186	TC033180		Filamin-A-like Protein	2	A: Large protein family
6	68	b	TC031046	TC033180		Filamin-A-like Protein	2	A: Large protein family
6	68	c	TC001109	TC033180		Spectrin beta chain, non-erythrocytic 5-like Protein	1	A: Large protein family
6	68	d	TC007173	TC033180		Spectrin beta chain-like Protein	1	A: Large protein family
6	68	e	TC033680	TC033180			251	A: Large protein family
6	69	a	TC015826	TC015766			251	A: Large protein family
6	69	b	TC015766	TC015826		Histone-lysine N-methyltransferase	1	A: Large protein family
6	69	c	TC031269	TC015826		Histone-lysine N-methyltransferase eggless-like Protein	1	A: Large protein family
6	69	d	TC004768	TC015826		Trithorax	1	A: Large protein family
6	69	e	TC012700	TC015826			251	A: Large protein family
6	69	e	TC014310	TC015826			251	A: Large protein family
6	70	a	TC032069	TC007197		Putative carbonic anhydrase 5-like Protein	1	A: Large protein family
6	70	b	TC034551	TC007197		Carbonic anhydrase 15-like protein	1	A: Large protein family
6	70	c	TC008569	TC007197		Carbonic anhydrase 9-like Protein	1	A: Large protein family
6	70	d	TC003286	TC032069		Carbonic anhydrase 1-like Protein	1	A: Large protein family
6	70	e	TC000608	TC032069		Carbonic anhydrase 7-like Protein	1	A: Large protein family
6	70	f	TC008308	TC032069		Carbonic anhydrase-related protein 10-like Protein	1	A: Large protein family
6	71	a	TC030689	TC015369		DNA-directed RNA polymerase subunit	6	A: Large protein family
6	71	ab	TC015369	TC030689		DNA-directed RNA polymerase subunit	6	A: Large protein family
6	71	ab	TC005003	TC030689		DNA-directed RNA polymerase subunit	6	A: Large protein family
6	71	c	TC009471	TC009430		DNA-directed RNA polymerase subunit	6	A: Large protein family
6	71	d	TC015082	TC009471		DNA-directed RNA polymerase subunit	6	A: Large protein family
6	71	d	TC010518	TC009471		DNA-directed RNA polymerase subunit	6	A: Large protein family
6	72	a	TC009730	TC008383		Multidrug resistance protein homolog 49-like Protein	2	A: Large protein family
6	72	ab	TC014809	TC009730		Multidrug resistance protein homolog 49-like Protein	2	A: Large protein family
6	72	c	TC008383	TC009730		Multidrug resistance protein homolog 65-like Protein	3	A: Large protein family
6	72	c	TC015192	TC009730		Multidrug resistance protein homolog 65-like Protein	3	A: Large protein family
6	72	d	TC034861	TC015333		Multidrug resistance protein homolog 65-like protein	3	A: Large protein family
6	72	e	TC015333	TC034861		ATP-binding cassette sub-family D member 2-like Protein	1	A: Large protein family
5	73	a	TC014342	TC014236		Histone deacetylase 5-like Protein	1	A: Large protein family
5	73	b	TC014236	TC014342		Histone deacetylase 6-like Protein	1	A: Large protein family
5	73	c	TC007473	TC014342		Histone deacetylase Rpd3-like Protein	1	A: Large protein family
5	73	d	TC032799	TC014342		Histone deacetylase	2	A: Large protein family
5	73	d	TC006104	TC014342		Histone deacetylase	2	A: Large protein family
5	74	a	TC032611	TC004722		Calpain-A-like Protein	2	A: Large protein family
5	74	b	TC014879	TC032611		Calpain-A-like Protein	2	A: Large protein family
5	74	c	TC007304	TC032611		Calpain-B-like Protein	1	A: Large protein family
5	74	d	TC031093	TC032611		Calpain-D-like Protein	1	A: Large protein family
5	74	e	TC006719	TC032611		Calpain-7-like Protein	1	A: Large protein family
5	75	a	TC000609	TC000531		Myotubularin-related protein 10-B-like Protein	1	A: Large protein family
5	75	b	TC007785	TC000609		Myotubularin-related protein 13-like Protein	1	A: Large protein family
5	75	c	TC000531	TC000609		Myotubularin-related protein 2-like Protein	1	A: Large protein family
5	75	d	TC015545	TC000609		Myotubularin-related protein 3-like Protein	1	A: Large protein family
5	75	e	TC013907	TC000609		Myotubularin-related protein 9-like Protein	1	A: Large protein family
5	76	a	TC003875	TC033793		RecQ4	1	A: Large protein family
5	76	ab	TC033793	TC003875		Bloom syndrome protein homolog-like Protein	4	A: Large protein family
5	76	b	TC033312	TC033793		Bloom syndrome protein homolog-like Protein	4	A: Large protein family
5	76	b	TC004664	TC033793		Bloom syndrome protein homolog-like Protein	4	A: Large protein family
5	76	b	TC011701	TC033793		Bloom syndrome protein homolog-like Protein	4	A: Large protein family
5	77	a	TC005432	TC013582		Cathepsin B	1	A: Large protein family
5	77	b	TC009486	TC013582		Cathepsin L	2	A: Large protein family
5	77	b	TC011003	TC013582		Cathepsin L	2	A: Large protein family
5	77	c	TC007214	TC013582		Cathepsin O	1	A: Large protein family
5	77	d	TC009844	TC013582		Cystatin	1	A: Large protein family
5	78	a	TC002887	TC015524		Anaphase-promoting complex subunit 2-like Protein	1	A: Large protein family
5	78	ab	TC015524	TC002887		Cullin homolog 1-like Protein	4	A: Large protein family
5	78	b	TC031506	TC015524		Cullin homolog 1-like Protein	4	A: Large protein family
5	78	b	TC013922	TC015524		Cullin homolog 1-like Protein	4	A: Large protein family
5	78	b	TC009545	TC015524		Cullin homolog 1-like Protein	4	A: Large protein family
5	79	a	TC005288	TC009163		Gamma-tubulin complex component	4	A: Large protein family
5	79	ab	TC009163	TC005288		Gamma-tubulin complex component	4	A: Large protein family
5	79	b	TC007942	TC005288		Gamma-tubulin complex component	4	A: Large protein family
5	79	b	TC014466	TC005288		Gamma-tubulin complex component	4	A: Large protein family
5	79	c	TC033928	TC005288			251	A: Large protein family
5	80	a	TC012577	TC005398		Histone H3-like Protein	2	A: Large protein family
5	80	b	TC005398	TC012577		Histone H3	2	A: Large protein family
5	80	b	TC001497	TC012577		Histone H3	2	A: Large protein family
5	80	b	TC031843	TC012577		Histone H3-like Protein	2	A: Large protein family
5	80	c	TC031910	TC012577			251	A: Large protein family
5	81	a	TC005134	TC011390			251	A: Large protein family
5	81	ab	TC011390	TC005134		Alanine--glyoxylate aminotransferase 2-like	3	A: Large protein family
5	81	b	TC034300	TC005134		Alanine--glyoxylate aminotransferase 2-like	3	A: Large protein family
5	81	b	TC011528	TC005134		Alanine--glyoxylate aminotransferase 2-like	3	A: Large protein family
5	81	c	TC034299	TC005134		4-aminobutyrate aminotransferase, mitochondrial-like Protein	1	A: Large protein family
5	82	a	TC014506	TC033621		Putative cleavage and polyadenylation specificity factor subunit 2-like Protein	1	A: Large protein family
5	82	ab	TC033621	TC014506		Cleavage and polyadenylation specificity factor 73-like Protein	3	A: Large protein family
5	82	b	TC033620	TC014506		Cleavage and polyadenylation specificity factor 73-like Protein	3	A: Large protein family
5	82	b	TC009205	TC014506		Cleavage and polyadenylation specificity factor 73-like Protein	3	A: Large protein family
5	82	c	TC006621	TC014506		Integrator complex subunit 9-like Protein	1	A: Large protein family
5	83	a	TC009993	TC009496		Spastin-like Protein	1	A: Large protein family
5	83	b	TC010011	TC009993		Spastin	1	A: Large protein family
5	83	c	TC003829	TC009993		Fidgetin-like protein 1	3	A: Large protein family
5	83	c	TC005313	TC009993		Fidgetin-like protein 1	3	A: Large protein family
5	83	c	TC016198	TC009993		Fidgetin-like protein 1	3	A: Large protein family
5	84	a	TC010772	TC006857		Isoleucine--tRNA ligase, cytoplasmic-like Protein	1	A: Large protein family
5	84	a	TC002282	TC006857		Isoleucine--tRNA ligase-like protein, mitochondrial	1	A: Large protein family
5	84	a	TC008372	TC006857		Leucine--tRNA ligase, cytoplasmic-like Protein	1	A: Large protein family
5	84	a	TC009707	TC006857		Methionine--tRNA ligase, cytoplasmic-like Protein	1	A: Large protein family
5	84	a	TC003172	TC006857		Putative leucine--tRNA ligase, mitochondrial-like Protein	1	A: Large protein family
5	85	a	TC000875	TC014177		Sphingosine-1-phosphate lyase-like Protein	1	A: Large protein family
5	85	ab	TC014177	TC000875		Glutamate decarboxylase-like Protein	2	A: Large protein family
5	85	b	TC034596	TC000875		Glutamate decarboxylase-like protein	2	A: Large protein family
5	85	c	TC012567	TC000875		Histidine decarboxylase-like Protein	1	A: Large protein family
5	85	d	TC005445	TC000875		Pyridoxal-dependent decarboxylase domain-containing protein 1-like Protein	1	A: Large protein family
5	86	a	TC001243	TC006102		Vacuolar protein sorting-associated protein 33A-like Protein	2	A: Large protein family
5	86	b	TC006102	TC001243		Vacuolar protein sorting-associated protein 33A-like Protein	2	A: Large protein family
5	86	c	TC002297	TC001243		Protein ROP-like Protein	1	A: Large protein family
5	86	d	TC007530	TC001243		Protein sly1 homolog-like Protein	1	A: Large protein family
5	86	e	TC011120	TC001243		Ras opposite	1	A: Large protein family
5	87	a	TC001632	TC010040			251	A: Large protein family
5	87	b	TC001616	TC010040			251	A: Large protein family
5	87	c	TC009802	TC001632		Inactivation-no-after-potential D protein-like Protein	1	A: Large protein family
5	87	d	TC001640	TC001632		Patj homolog-like Protein	1	A: Large protein family
5	87	e	TC009801	TC001632			251	A: Large protein family
5	88	a	TC002096	TC014956			251	A: Large protein family
5	88	ab	TC014956	TC002096		Putative GDP-L-fucose synthase-like Protein	1	A: Large protein family
5	88	b	TC009301	TC002096		Putative UDP-glucose 4-epimerase-like Protein	1	A: Large protein family
5	88	c	TC004005	TC002096		GDP-mannose 4,6 dehydratase-like Protein	1	A: Large protein family
5	88	d	TC000317	TC002096			251	A: Large protein family
5	89	a	TC031476	TC013742		Myosin-IB-like Protein	2	A: Large protein family
5	89	a	TC001321	TC013742		Myosin-IB-like Protein	2	A: Large protein family
5	89	b	TC032522	TC013742		Myosin-VIIa-like Protein	1	A: Large protein family
5	89	c	TC000685	TC013742		Myosin heavy chain 95F-like Protein	1	A: Large protein family
5	89	d	TC009935	TC013742		Unconventional myosin-Vb-like Protein	1	A: Large protein family
5	90	a	TC002784	TC009174		Nuclear valosin-containing protein-like	1	A: Large protein family
5	90	b	TC009174	TC002784		Transitional endoplasmic reticulum ATPase TER94	1	A: Large protein family
5	90	c	TC014648	TC002784		Peroxisome biogenesis factor 1-like Protein	1	A: Large protein family
5	90	d	TC002647	TC002784		Transitional endoplasmic reticulum ATPase TER94-like Protein	2	A: Large protein family
5	90	e	TC008415	TC002784		Transitional endoplasmic reticulum ATPase TER94-like Protein	2	A: Large protein family
5	91	a	TC007010	TC002920		Centrosomal protein of 97 kDa-like Protein	1	A: Large protein family
5	91	b	TC006409	TC002920		Protein lap4-like Protein	1	A: Large protein family
5	91	c	TC003526	TC002920		Protein tilB-like Protein	1	A: Large protein family
5	91	d	TC015835	TC002920			251	A: Large protein family
5	91	d	TC033638	TC002920			251	A: Large protein family
5	92	a	TC005830	TC005815		Golgi-specific brefeldin A-resistance guanine nucleotide exchange factor 1-like Protein	1	A: Large protein family
5	92	ab	TC005815	TC005830		Cytohesin-3-like Protein	1	A: Large protein family
5	92	c	TC011095	TC005830		PH and SEC7 domain-containing protein 3-like Protein	1	A: Large protein family
5	92	d	TC005167	TC005830		IQ motif and SEC7 domain-containing protein 1-like Protein	1	A: Large protein family
5	92	e	TC004594	TC005830		Protein MON2 homolog-like Protein	1	A: Large protein family
5	93	a	TC009450	TC000237		Far upstream element-binding protein 1-like Protein	1	A: Large protein family
5	93	b	TC000237	TC009450		Poly(RC)-binding protein 3-like Protein	1	A: Large protein family
5	93	c	TC008998	TC009450		RNA-binding protein Nova-1-like Protein	1	A: Large protein family
5	93	d	TC009519	TC009450		Heterogeneous nuclear ribonucleoprotein K-like Protein	1	A: Large protein family
5	93	e	TC031140	TC009450		Insulin-like growth factor 2 mRNA-binding protein 1	1	A: Large protein family
5	94	a	TC011845	TC008111		F-box-like/WD repeat-containing protein ebi	1	A: Large protein family
5	94	b	TC008111	TC011845			251	A: Large protein family
5	94	c	TC003502	TC011845		Putative histone-binding protein Caf1-like Protein	2	A: Large protein family
5	94	c	TC006775	TC011845		Putative histone-binding protein Caf1-like Protein	2	A: Large protein family
5	94	d	TC012809	TC011845		WD repeat-containing protein 24-like Protein	1	A: Large protein family
5	95	a	TC010992	TC033960		Huckebein	1	A: Large protein family
5	95	b	TC033960	TC010992		Krueppel-like factor 5	1	A: Large protein family
5	95	c	TC004670	TC010992		Transcription factor Sp3-like Protein	1	A: Large protein family
5	95	d	TC011697	TC010992		Lethal Sp8	1	A: Large protein family
5	95	e	TC032606	TC010992			251	A: Large protein family
5	96	a	TC003117	TC005801		Dehydrogenase/reductase SDR family member 4-like Protein	1	A: Large protein family
5	96	ab	TC003118	TC005801		Peroxisomal multifunctional enzyme type 2-like Protein	1	A: Large protein family
5	96	b	TC005801	TC003117		Hydroxysteroid dehydrogenase-like protein 2	1	A: Large protein family
5	96	c	TC032498	TC003117		C-factor-like Protein	1	A: Large protein family
5	96	d	TC000272	TC003117		3-oxoacyl-[acyl-carrier-protein] reductase FabG-like Protein	1	A: Large protein family
5	97	a	TC013937	TC012725		Large subunit GTPase 1 homolog-like Protein	2	A: Large protein family
5	97	ab	TC003476	TC013937		Large subunit GTPase 1 homolog-like Protein	2	A: Large protein family
5	97	c	TC012725	TC013937		Guanine nucleotide-binding protein-like 3 homolog	1	A: Large protein family
5	97	d	TC009617	TC013937		Mitochondrial GTPase 1	1	A: Large protein family
5	97	e	TC012448	TC013937		Nitric oxide-associated protein 1-like Protein	1	A: Large protein family
5	98	a	TC014336	TC005461		GTP-binding protein 10 homolog-like Protein	1	A: Large protein family
5	98	b	TC005461	TC014336			251	A: Large protein family
5	98	c	TC008833	TC014336		Nucleolar GTP-binding protein 1	1	A: Large protein family
5	98	d	TC005867	TC014336		GTP-binding protein 128up-like Protein	1	A: Large protein family
5	98	e	TC014754	TC014336		Mitochondrial ribosome-associated GTPase 2-like Protein	1	A: Large protein family
5	99	a	TC031193	TC015839			251	A: Large protein family
5	99	b	TC015839	TC031193		Cyclin-L1-like Protein	1	A: Large protein family
5	99	c	TC009354	TC031193		Cyclin-H-like Protein	1	A: Large protein family
5	99	d	TC000577	TC031193		Cyclin-T-like Protein	2	A: Large protein family
5	99	d	TC009550	TC031193		Cyclin-T-like Protein	2	A: Large protein family
5	100	a	TC032198	TC014554		Poly(U)-binding-splicing factor half pint-like Protein	1	A: Large protein family
5	100	b	TC034524	TC014554		Protein elav-like protein	1	A: Large protein family
5	100	c	TC001720	TC014554		RNA-binding protein 24-A-like Protein	1	A: Large protein family
5	100	d	TC014625	TC014554		RNA-binding protein 45-like Protein	1	A: Large protein family
5	100	e	TC003731	TC014554		Splicing factor 3B subunit 4-like Protein	1	A: Large protein family
5	101	a	TC015200	TC011508		Metalloendopeptidase	2	A: Large protein family
5	101	ab	TC002341	TC011508		Metalloendopeptidase	2	A: Large protein family
5	101	c	TC011508	TC015200			251	A: Large protein family
5	101	d	TC031117	TC015200		Cubilin-like Protein	1	A: Large protein family
5	101	e	TC011252	TC015200		Neurexin-4-like Protein	1	A: Large protein family
5	102	a	TC012185	TC031437		Heat shock protein 83-like Protein	2	A: Large protein family
5	102	ab	TC014606	TC031437			251	A: Large protein family
5	102	b	TC032962	TC012185		Heat shock protein 83-like Protein	2	A: Large protein family
5	102	c	TC031437	TC012185		Heat shock protein 75 kDa, mitochondrial-like Protein	2	A: Large protein family
5	102	c	TC031438	TC012185		Heat shock protein 75 kDa, mitochondrial-like Protein	2	A: Large protein family
5	103	a	TC008638	TC034867		Protein kinase C	2	A: Large protein family
5	103	b	TC008637	TC034867		Protein kinase C	2	A: Large protein family
5	103	c	TC032365	TC008638		Protein kinase C, brain isozyme-like Protein	2	A: Large protein family
5	103	c	TC032364	TC008638		Protein kinase C, brain isozyme-like Protein	2	A: Large protein family
5	103	d	TC032431	TC008638			251	A: Large protein family
5	104	a	TC002587	TC004142		Calcium/calmodulin-dependent protein kinase type II alpha chain-like Protein	2	A: Large protein family
5	104	b	TC015359	TC002587		Calcium/calmodulin-dependent protein kinase type II alpha chain-like Protein	2	A: Large protein family
5	104	c	TC002107	TC002587		Ovarian-specific serine/threonine-protein kinase Lok-like Protein	1	A: Large protein family
5	104	d	TC016079	TC002587		Serine/threonine-protein kinase CG17528-like Protein	1	A: Large protein family
5	104	e	TC012166	TC002587		Polarization-related protein LKB1	1	A: Large protein family
4	105	a	TC000666	TC032506		Carboxypeptidase	4	A: Large protein family
4	105	a	TC000665	TC032506		Carboxypeptidase	4	A: Large protein family
4	105	a	TC000664	TC032506		Carboxypeptidase	4	A: Large protein family
4	105	a	TC000887	TC032506		Carboxypeptidase	4	A: Large protein family
4	106	a	TC004861	TC003270		Palmitoyltransferase	4	A: Large protein family
4	106	a	TC010521	TC003270		Palmitoyltransferase	4	A: Large protein family
4	106	a	TC014595	TC003270		Palmitoyltransferase	4	A: Large protein family
4	106	a	TC012534	TC003270		Palmitoyltransferase	4	A: Large protein family
4	107	a	TC014929	TC013791		Peroxiredoxin 1-like Protein	4	A: Large protein family
4	107	a	TC001700	TC013791		Peroxiredoxin 1-like Protein	4	A: Large protein family
4	107	a	TC001071	TC013791		Peroxiredoxin 1-like Protein	4	A: Large protein family
4	107	a	TC012328	TC013791		Peroxiredoxin 1-like Protein	4	A: Large protein family
4	108	a	TC000075	TC005757		Structural maintenance of chromosomes protein	3	A: Large protein family
4	108	a	TC005672	TC005757		Structural maintenance of chromosomes protein	3	A: Large protein family
4	108	a	TC011028	TC005757		Structural maintenance of chromosomes protein	3	A: Large protein family
4	108	b	TC015468	TC005757		Structural maintenance of chromosomes protein 3-like Protein	1	A: Large protein family
4	109	a	TC008984	TC014107		tRNA-dihydrouridine(20a/20b) synthase [NAD(P)+]-like	1	A: Large protein family
4	109	ab	TC014107	TC008984		tRNA-dihydrouridine(20) synthase [NAD(P)+]-like	1	A: Large protein family
4	109	b	TC010522	TC008984		tRNA-dihydrouridine(16/17) synthase [NAD(P)(+)]-like	1	A: Large protein family
4	109	b	TC014592	TC008984		tRNA-dihydrouridine(47) synthase [NAD(P)(+)]	1	A: Large protein family
4	110	a	TC009714	TC013628		Xanthine dehydrogenase-like Protein	4	A: Large protein family
4	110	a	TC009715	TC013628		Xanthine dehydrogenase-like Protein	4	A: Large protein family
4	110	a	TC012132	TC013628		Xanthine dehydrogenase-like Protein	4	A: Large protein family
4	110	a	TC012131	TC013628		Xanthine dehydrogenase-like Protein	4	A: Large protein family
4	111	a	TC007999	TC009675		26S protease regulatory subunit 4-like Protein	3	A: Large protein family
4	111	ab	TC009675	TC007999		26S protease regulatory subunit 4-like Protein	3	A: Large protein family
4	111	b	TC010100	TC007999		26S protease regulatory subunit 4-like Protein	3	A: Large protein family
4	111	c	TC006492	TC007999		26S protease regulatory subunit 8-like Protein	1	A: Large protein family
4	112	a	TC004557	TC032623		Aminopeptidase N-like protein	1	A: Large protein family
4	112	b	TC000165	TC032623		Aminopeptidase-like protein	2	A: Large protein family
4	112	b	TC009901	TC032623		Aminopeptidase-like protein	2	A: Large protein family
4	112	c	TC030950	TC032623		Glutamyl aminopeptidase-like Protein	1	A: Large protein family
4	113	a	TC013017	TC009000		CTD nuclear envelope phosphatase 1 homolog-like Protein	2	A: Large protein family
4	113	ab	TC009000	TC013017		CTD small phosphatase-like protein 2	1	A: Large protein family
4	113	b	TC011922	TC013017		CTD nuclear envelope phosphatase 1 homolog-like Protein	2	A: Large protein family
4	113	c	TC006148	TC013017		Mitochondrial import inner membrane translocase subunit TIM50-C-like Protein	1	A: Large protein family
4	114	a	TC014075	TC011771		DNA-directed RNA polymerase subunit beta	3	A: Large protein family
4	114	ab	TC011771	TC014075		DNA-directed RNA polymerase subunit beta	3	A: Large protein family
4	114	b	TC006301	TC014075		DNA-directed RNA polymerase subunit beta	3	A: Large protein family
4	114	c	TC000020	TC014075			251	A: Large protein family
4	115	a	TC032882	TC014544		G1/S-specific cyclin-D3-like Protein	1	A: Large protein family
4	115	ab	TC014544	TC032882		G2/mitotic-specific cyclin-B-like Protein	1	A: Large protein family
4	115	b	TC013167	TC032882		G2/mitotic-specific cyclin-B3-like Protein	1	A: Large protein family
4	115	c	TC007193	TC032882		G2/mitotic-specific cyclin-A-like Protein	1	A: Large protein family
4	116	a	TC032823	TC032689		Leucine-rich repeat protein soc-2 homolog-like Protein	3	A: Large protein family
4	116	a	TC011315	TC032689		Leucine-rich repeat protein soc-2 homolog-like Protein	3	A: Large protein family
4	116	a	TC008530	TC032689		Leucine-rich repeat protein soc-2 homolog-like Protein	3	A: Large protein family
4	116	b	TC011397	TC032689			251	A: Large protein family
4	117	a	TC001003	TC033432		NAD-dependent protein deacetylase Sirt6-like Protein	1	A: Large protein family
4	117	ab	TC033432	TC001003		NAD-dependent protein deacylase	1	A: Large protein family
4	117	b	TC009705	TC001003		NAD-dependent protein deacetylase Sirt2-like Protein	1	A: Large protein family
4	117	c	TC002298	TC001003			251	A: Large protein family
4	118	a	TC034244	TC006457		5-hydroxytryptamine receptor 2A-like Protein	1	A: Large protein family
4	118	b	TC012597	TC006457		CG6989-like octopamine receptor	1	A: Large protein family
4	118	c	TC000574	TC006457		Dopamine receptor 2-like Protein	1	A: Large protein family
4	118	d	TC015120	TC006457			251	A: Large protein family
4	119	a	TC012576	TC001738		Casein kinase I isoform alpha-like Protein	1	A: Large protein family
4	119	a	TC034052	TC001738		Discs overgrown protein kinase-like Protein	2	A: Large protein family
4	119	a	TC005606	TC001738		Discs overgrown protein kinase-like Protein	2	A: Large protein family
4	119	a	TC012687	TC001738		Nucleosomal histone kinase 1-like Protein	1	A: Large protein family
4	120	a	TC001887	TC004591		Voltage-dependent calcium channel subunit alpha-2/delta-3-like Protein	3	A: Large protein family
4	120	ab	TC004591	TC001887		Voltage-dependent calcium channel subunit alpha-2/delta-3-like Protein	3	A: Large protein family
4	120	b	TC034736	TC001887		Voltage-dependent calcium channel subunit alpha-2/delta-3-like protein	3	A: Large protein family
4	120	c	TC001965	TC001887		VWFA and cache domain-containing protein CG16868-like Protein	1	A: Large protein family
4	121	a	TC002078	TC012639		Nitric oxide synthase-like Protein	1	A: Large protein family
4	121	ab	TC012639	TC002078		Nitric oxide synthase	1	A: Large protein family
4	121	c	TC012437	TC002078		NADPH--cytochrome P450 reductase	1	A: Large protein family
4	121	d	TC012523	TC002078		NADPH-dependent diflavin oxidoreductase 1	1	A: Large protein family
4	122		TC031426	TC002741		Neutral alpha-glucosidase AB-like Protein	3	A: Large protein family
4	122		TC031427	TC002741		Neutral alpha-glucosidase AB-like Protein	3	A: Large protein family
4	122		TC032418	TC002741		Neutral alpha-glucosidase AB-like Protein	3	A: Large protein family
4	122		TC008276	TC002741		Putative family 31 glucosidase KIAA1161-like Protein	1	A: Large protein family
4	123	a	TC007752	TC011923		Protein stoned-B-like Protein	1	A: Large protein family
4	123	b	TC010498	TC011923		AP-1 complex subunit mu-1-like Protein	2	A: Large protein family
4	123	b	TC001437	TC011923		AP-1 complex subunit mu-1-like Protein	2	A: Large protein family
4	123	c	TC011059	TC011923		AP-3 complex subunit mu-1-like Protein	1	A: Large protein family
4	124		TC032828	TC012483		Echinoderm microtubule-associated protein-like CG42247	1	A: Large protein family
4	124		TC003718	TC012483		WD repeat-containing protein 16-like Protein	1	A: Large protein family
4	124		TC032737	TC012483		WD repeat-containing protein 52-like Protein	1	A: Large protein family
4	124		TC034227	TC012483		WD repeat-containing protein 66-like Protein	1	A: Large protein family
4	125		TC003518	TC012676		Dual specificity protein phosphatase 22-like Protein	1	A: Large protein family
4	125		TC010951	TC012676		Dual specificity protein phosphatase Mpk3-like Protein	1	A: Large protein family
4	125		TC030675	TC012676		Phosphatidylglycerophosphatase and protein-tyrosine phosphatase 1-like Protein	1	A: Large protein family
4	125		TC034442	TC012676		Protein phosphatase Slingshot-like Protein	1	A: Large protein family
4	126	a	TC002673	TC003628		Peripheral plasma membrane protein CASK-like Protein	3	A: Large protein family
4	126	ab	TC003628	TC002673		Peripheral plasma membrane protein CASK-like Protein	3	A: Large protein family
4	126	b	TC033082	TC002673		Peripheral plasma membrane protein CASK-like Protein	3	A: Large protein family
4	126	c	TC031096	TC002673		MAGUK p55 subfamily member 5-like Protein	1	A: Large protein family
4	127	a	TC006029	TC034448		Protein diaphanous-like Protein	1	A: Large protein family
4	127	b	TC011477	TC034448			251	A: Large protein family
4	127	b	TC032667	TC034448			251	A: Large protein family
4	127	b	TC033344	TC034448			251	A: Large protein family
4	128	a	TC003996	TC012507		DnaJ homolog subfamily B member 12-like Protein	1	A: Large protein family
4	128	ab	TC012507	TC003996		DnaJ protein homolog 1-like Protein	2	A: Large protein family
4	128	b	TC013191	TC003996		DnaJ protein homolog 1-like Protein	2	A: Large protein family
4	128	c	TC013491	TC003996		DnaJ homolog subfamily B member 11-like Protein	1	A: Large protein family
4	129	a	TC004385	TC002054		Translation initiation factor eIF-2B subunit alpha-like Protein	1	A: Large protein family
4	129	b	TC002054	TC004385		Methylthioribose-1-phosphate isomerase-like Protein	1	A: Large protein family
4	129	c	TC008223	TC004385		Translation initiation factor eIF-2B subunit delta-like Protein	1	A: Large protein family
4	129	d	TC016125	TC004385			251	A: Large protein family
4	130	a	TC004434	TC009279		Charged multivesicular body protein 5-like Protein	1	A: Large protein family
4	130	ab	TC009279	TC004434		Charged multivesicular body protein 4b-like Protein	2	A: Large protein family
4	130	b	TC009281	TC004434		Charged multivesicular body protein 4b-like Protein	2	A: Large protein family
4	130	c	TC004889	TC004434		Charged multivesicular body protein 7-like Protein	1	A: Large protein family
4	131	a	TC004715	TC033821		Voltage-dependent L-type calcium channel subunit alpha	1	A: Large protein family
4	131	b	TC001338	TC004715		Sodium leak channel non-selective protein-like Protein	1	A: Large protein family
4	131	c	TC008776	TC004715		Sodium channel protein	1	A: Large protein family
4	131	d	TC034186	TC004715			251	A: Large protein family
4	132	a	TC004947	TC009035		Tubulin beta-3 chain-like Protein	1	A: Large protein family
4	132	b	TC004522	TC004947		Tubulin alpha chain	2	A: Large protein family
4	132	b	TC004873	TC004947		Tubulin alpha chain	2	A: Large protein family
4	132	c	TC014883	TC004947		Tubulin gamma chain	1	A: Large protein family
4	133	a	TC006105	TC009547		Zinc finger CCHC-type and RNA-binding motif-containing protein 1-like Protein	1	A: Large protein family
4	133	b	TC009547	TC006105		RNA-binding motif protein, X-linked 2-like Protein	1	A: Large protein family
4	133	c	TC004378	TC006105		Cleavage stimulation factor subunit 2-like Protein	1	A: Large protein family
4	133	d	TC005736	TC006105		Splicing factor U2AF 50 kDa subunit-like Protein	1	A: Large protein family
4	134	a	TC015503	TC031214		Potassium voltage-gated channel protein eag-like Protein	2	A: Large protein family
4	134	a	TC004313	TC031214		Potassium voltage-gated channel protein eag-like Protein	2	A: Large protein family
4	134	b	TC015502	TC031214			251	A: Large protein family
4	134	b	TC033425	TC031214			251	A: Large protein family
4	135	a	TC012834	TC032383		Attractin-like protein 1	1	A: Large protein family
4	135	b	TC002285	TC032383		Netrin	1	A: Large protein family
4	135	c	TC033640	TC032383		Pikachurin-like Protein	1	A: Large protein family
4	135	d	TC004709	TC032383			251	A: Large protein family
4	136	a	TC015925	TC032568		Protein phosphatase 1B-like Protein	1	A: Large protein family
4	136	b	TC034727	TC032568		Protein phosphatase 1D-like protein	1	A: Large protein family
4	136	c	TC012046	TC032568		TGF-beta-activated kinase 1 and MAP3K7-binding protein 1-like Protein	1	A: Large protein family
4	136	d	TC016037	TC032568			251	A: Large protein family
4	137	a	TC011380	TC034022		DNA polymerase theta-like Protein	1	A: Large protein family
4	137	b	TC033645	TC034022		Helicase SKI2W-like Protein	1	A: Large protein family
4	137	c	TC034734	TC034022		Putative U5 small nuclear ribonucleoprotein 200 kDa helicase-like protein	2	A: Large protein family
4	137	c	TC031972	TC034022		Putative U5 small nuclear ribonucleoprotein 200 kDa helicase-like Protein	2	A: Large protein family
4	138	a	TC002503	TC010871		Monoacylglycerol lipase ABHD12-like Protein	2	A: Large protein family
4	138	ab	TC002502	TC010871		Monoacylglycerol lipase ABHD12-like Protein	2	A: Large protein family
4	138	b	TC002972	TC002503		Abhydrolase domain-containing protein 16A-like Protein	1	A: Large protein family
4	138	c	TC005853	TC002503		Alpha/beta hydrolase domain-containing protein 13-like Protein	1	A: Large protein family
4	139	a	TC010429	TC033710		Protein O-mannosyltransferase 1-like Protein	1	A: Large protein family
4	139	b	TC033710	TC010429		Protein O-mannosyl-transferase 2-like Protein	1	A: Large protein family
4	139	c	TC033711	TC010429		4-hydroxybenzoate polyprenyltransferase, mitochondrial	1	A: Large protein family
4	139	d	TC005068	TC010429			251	A: Large protein family
4	140	a	TC014935	TC034925		Phosphatidylinositol 4-kinase alpha-like Protein	1	A: Large protein family
4	140	b	TC011124	TC014935		Four wheel drive	1	A: Large protein family
4	140	c	TC000620	TC014935		Phosphatidylinositol 3-kinase	1	A: Large protein family
4	140	d	TC011996	TC014935		Phosphatidylinositol 4,5-bisphosphate 3-kinase catalytic subunit delta isoform-like Protein	1	A: Large protein family
4	141	a	TC015853	TC015325		P protein-like Protein	1	A: Large protein family
4	141	ab	TC015325	TC015853		Protein I'm not dead yet-like Protein	3	A: Large protein family
4	141	b	TC015326	TC015853		Protein I'm not dead yet-like Protein	3	A: Large protein family
4	141	b	TC015404	TC015853		Protein I'm not dead yet-like Protein	3	A: Large protein family
4	142	a	TC033614	TC012553		Mannose-1-phosphate guanyltransferase beta-like Protein	2	A: Large protein family
4	142	b	TC012553	TC033614		Translation initiation factor eIF-2B subunit gamma-like Protein	1	A: Large protein family
4	142	c	TC008441	TC033614		Translation initiation factor eIF-2B subunit epsilon-like Protein	1	A: Large protein family
4	142	d	TC015659	TC033614		Mannose-1-phosphate guanyltransferase beta-like Protein	2	A: Large protein family
4	143	a	TC012537	TC013601		MutS protein homolog 5-like Protein	1	A: Large protein family
4	143	b	TC013601	TC012537		Putative DNA mismatch repair protein Msh6-like Protein	1	A: Large protein family
4	143	c	TC002071	TC012537			251	A: Large protein family
4	143	c	TC006364	TC012537			251	A: Large protein family
4	144	a	TC013185	TC004262		Tyrosine aminotransferase-like Protein	1	A: Large protein family
4	144	b	TC004262	TC013185			251	A: Large protein family
4	144	c	TC011119	TC013185		Kynurenine--oxoglutarate transaminase 3-like Protein	1	A: Large protein family
4	144	d	TC012980	TC013185		Alanine aminotransferase 2-like Protein	1	A: Large protein family
4	145	a	TC013738	TC001443		Solute carrier family 35 member B1 homolog-like Protein	1	A: Large protein family
4	145	b	TC001443	TC013738		UDP-xylose and UDP-N-acetylglucosamine transporter-like Protein	1	A: Large protein family
4	145	c	TC003883	TC013738		Adenosine 3'-phospho 5'-phosphosulfate transporter 2-like Protein	1	A: Large protein family
4	145	d	TC033608	TC013738			251	A: Large protein family
4	146	a	TC010464	TC034075		F-box/SPRY domain-containing protein 1-like Protein	1	A: Large protein family
4	146	ab	TC034075	TC010464		Protein gustavus-like Protein	2	A: Large protein family
4	146	b	TC013469	TC010464		Protein gustavus-like Protein	2	A: Large protein family
4	146	c	TC006623	TC010464		SPRY domain-containing SOCS box protein 3-like Protein	1	A: Large protein family
4	147	a	TC006516	TC010458		Ribokinase	1	A: Large protein family
4	147	b	TC010458	TC006516		Transmembrane protein 256 homolog-like Protein	1	A: Large protein family
4	147	c	TC013351	TC006516		Pseudouridine-5'-phosphate glycosidase-like Protein	1	A: Large protein family
4	147	d	TC005644	TC006516		Adenosine kinase-like Protein	1	A: Large protein family
4	148	a	TC008466	TC004299	dpp	Protein decapentaplegic	1	A: Large protein family
4	148	b	TC034642	TC008466		Bone morphogenetic protein 8B-like protein	1	A: Large protein family
4	148	c	TC014017	TC008466		Glass bottom boat	1	A: Large protein family
4	148	d	TC014018	TC008466		Glass bottom boat2	1	A: Large protein family
4	149	a	TC008474	TC002426		Host cell factor-like Protein	1	A: Large protein family
4	149	b	TC033009	TC008474		F-box only protein 42-like Protein	1	A: Large protein family
4	149	c	TC008426	TC008474		Leucine-zipper-like transcriptional regulator 1	1	A: Large protein family
4	149	d	TC034515	TC008474			251	A: Large protein family
4	150	a	TC008514	TC015522		Sarcosine dehydrogenase, mitochondrial-like Protein	1	A: Large protein family
4	150	b	TC015522	TC008514		Aminomethyltransferase	1	A: Large protein family
4	150	c	TC007498	TC008514		Protein yippee-like	2	A: Large protein family
4	150	c	TC006713	TC008514		Protein yippee-like	2	A: Large protein family
4	151	a	TC009541	TC014707		BTB/POZ domain-containing protein 9-like Protein	1	A: Large protein family
4	151	b	TC014707	TC009541		BTB/POZ domain-containing protein 6-like Protein	1	A: Large protein family
4	151	c	TC032118	TC009541		Protein roadkill-like Protein	1	A: Large protein family
4	151	d	TC003018	TC009541		Ring canal kelch protein-like Protein	1	A: Large protein family
4	152	a	TC006110	TC007133		Munster	1	A: Large protein family
4	152	b	TC033748	TC006110		Homeobox protein orthopedia-like Protein	1	A: Large protein family
4	152	c	TC008926	TC006110		Homeobrain	1	A: Large protein family
4	152	d	TC032830	TC006110		Paired box protein Pax-6-like Protein	1	A: Large protein family
4	153	a	TC034440	TC010520		Annexin	4	A: Large protein family
4	153	a	TC034439	TC010520		Annexin	4	A: Large protein family
4	153	a	TC011791	TC010520		Annexin	4	A: Large protein family
4	153	a	TC011788	TC010520		Annexin	4	A: Large protein family
4	154	a	TC030696	TC013052		Importin-4-like Protein	2	A: Large protein family
4	154	a	TC002377	TC013052		Importin-4-like Protein	2	A: Large protein family
4	154	ab	TC001725	TC030696		Importin subunit beta-like Protein	2	A: Large protein family
4	154	ab	TC014672	TC030696		Importin subunit beta-like Protein	2	A: Large protein family
4	155	a	TC007647	TC035035		DDB1-and CUL4-associated factor 8-like Protein	1
4	155	b	TC035035	TC007647		DDB1-and CUL4-associated factor 6-like protein	2
4	155	b	TC033554	TC007647		DDB1-and CUL4-associated factor 6-like Protein	2
4	155	c	TC004375	TC035035		WD and tetratricopeptide repeats protein 1-like Protein	1
4	156	a	TC032195	TC033211		CCR4-NOT transcription complex subunit 6-like Protein	1
4	156	b	TC007970	TC033211		Protein angel homolog 1-like Protein	1
4	156	b	TC003159	TC033211		Protein angel-like Protein	1
4	156	c	TC014029	TC032195		2',5'-phosphodiesterase 12-like Protein	1
3	1	a	TC032517	TC034012	Tmc123	Transmembrane channel-like protein 1	1	I: Missing in Ctenophora; possible duplication shared by Benthozoa (Fig. 5)
3	1	b	TC003849	TC034012	Tmc487	Transmembrane channel-like protein 7	2	I: Duplication defining Eumetazoa (Fig. 5)
3	1	c	TC034012	TC003849	Tmc56	Transmembrane channel-like protein 7	2	I: Duplication defining Eumetazoa (Fig. 5)
3	2	a	TC000954	TC034695	Mlx/Bigmax	Max-like protein X	1	I: Duplication defining Benthozoa (Figs. 6-7)
3	2	b	TC034695	TC000954	MLXIP/Mondo	MLX-interacting protein-like protein (C-terminal half)	1	I: Duplication defining Benthozoa (Figs. 6-7)
3	2	c	TC010471	TC000954	MLXIP/Mondo	MLX-interacting protein-like protein (N-terminal half)	1	I: Duplication defining Benthozoa (Figs. 6-7)
3	3	a	TC033816	TC011516		Alanine--tRNA ligase, mitochondrial-like Protein	1	A: Independent duplications; draft MP tree
3	3	b	TC011516	TC033816		Alanyl-tRNA editing protein Aarsd1-like Protein	1	A: Independent duplications; draft MP tree
3	3	c	TC013061	TC033816		Alanine--tRNA ligase, cytoplasmic-like Protein	1	A: Independent duplications; draft MP tree
3	4	a	TC002991	TC031392		alpha-1,2-Mannosidase	3	N: Multiple duplications pre-Metazoa
3	4	b	TC007447	TC002991		alpha-1,2-Mannosidase	3	N: Multiple duplications pre-Metazoa
3	4	b	TC005854	TC002991		alpha-1,2-Mannosidase	3	N: Multiple duplications pre-Metazoa
3	5	a	TC007305	TC011221		Anoctamin	3	A: Part of much larger family (8+ family members), with some in ctenophores
3	5	b	TC008787	TC007305		Anoctamin	3	A: Part of much larger family (8+ family members), with some in ctenophores
3	5	b	TC014620	TC007305		Anoctamin	3	A: Part of much larger family (8+ family members), with some in ctenophores
3	6	a	TC013703	TC000235		Inhibitor of growth protein	3	A: Draft MP tree needs further work for clarity, rule out gene loss
3	6	ab	TC000235	TC013703		Inhibitor of growth protein	3	A: Draft MP tree needs further work for clarity, rule out gene loss
3	6	b	TC007731	TC013703		Inhibitor of growth protein	3	A: Draft MP tree needs further work for clarity, rule out gene loss
3	7		TC031577	TC004143		Band 4.1-like protein 4A	1	A: Possibly multiple independent duplications
3	7		TC015016	TC004143		Band 4.1-like protein 5	1	A: Possibly multiple independent duplications
3	7		TC008668	TC004143			251	A: Possibly multiple independent duplications
3	8	a	TC000100	TC009327		Failed axon connections-like Protein	1	A: Not called in Mnemiopsis
3	8	b	TC009327	TC000100		Metaxin-2-like Protein	1	A: Not called in Mnemiopsis
3	8	c	TC001214	TC000100		Metaxin-1 homolog-like Protein	1	A: Not called in Mnemiopsis
3	9	a	TC010461	TC004424		Protein eyes shut homolog-like Protein	1	A: Complex multi-domain issues
3	9	b	TC004393	TC004424		Neurogenic locus Notch protein-like Protein	2	A: Complex multi-domain issues
3	9	c	TC013635	TC000086		Neurogenic locus Notch protein-like Protein	2	A: Complex multi-domain issues
3	10	a	TC014650	TC032549		SOX domain-containing protein dichaete-like Protein	1	A: Many more duplications in Nemvec
3	10	b	TC014065	TC032549		SoxNeuro	1	A: Many more duplications in Nemvec
3	10	c	TC007419	TC032549			251	A: Many more duplications in Nemvec
3	11	a	TC003692	TC004792		Serine/threonine-protein kinase greatwall-like Protein	1	A: Draft MP tree v01 suggestive; draft Bayesian tree unclear
3	11	b	TC004792	TC003692		Microtubule-associated serine/threonine-protein kinase 2-like Protein	1	A: Draft MP tree v01 suggestive; draft Bayesian tree unclear
3	11	c	TC012072	TC003692		cAMP-dependent protein kinase catalytic subunit-like Protein	1	A: Draft MP tree v01 suggestive; draft Bayesian tree unclear
3	12	a	TC005370	TC010594		Bifunctional methylenetetrahydrofolate dehydrogenase/cyclohydrolase, mitochondrial-like Protein	1	N: Duplicated before metazoan LCA
3	12	ab	TC010594	TC005370		C-1-tetrahydrofolate synthase, cytoplasmic-like Protein	2	N: Duplicated before metazoan LCA
3	12	b	TC010593	TC005370		C-1-tetrahydrofolate synthase, cytoplasmic-like Protein	2	N: Duplicated before metazoan LCA
3	13	a	TC005869	TC011816		26S proteasome non-ATPase regulatory subunit 14-like Protein	1	N: Duplicated before metazoan LCA
3	13	b	TC011816	TC005869		COP9 signalosome complex subunit 5-like Protein	1	N: Duplicated before metazoan LCA
3	13	c	TC014327	TC005869		Eukaryotic translation initiation factor 3 subunit H	1	N: Duplicated before metazoan LCA
3	14	a	TC008043	TC002911		Nidogen-2-like Protein	1	A: MISSING IN AMPHIMEDON
3	14	b	TC008151	TC008043		Low-density lipoprotein receptor-related protein 6-like Protein	1	A: MISSING IN AMPHIMEDON
3	14	c	TC031834	TC008043		Putative vitellogenin receptor-like Protein	1	A: MISSING IN AMPHIMEDON
3	15	a	TC008354	TC015322		NtpA	1	N: DUPLICATED PRIOR TO METAZOAN LCA
3	15	b	TC008728	TC008354		ATP synthase subunit alpha	1	N: DUPLICATED PRIOR TO METAZOAN LCA
3	15	c	TC012133	TC008354		V-type proton ATPase subunit B-like Protein	1	N: DUPLICATED PRIOR TO METAZOAN LCA
3	16	a	TC008996	TC014200		Scarecrow	1	A: Orthologues not called in Mnemiopsis; full set absent in Trichoplax
3	16	b	TC007014	TC008996		Homeobox protein vnd-like Protein	1	A: Orthologues not called in Mnemiopsis; full set absent in Trichoplax
3	16	c	TC011745	TC008996		Muscle-specific homeobox protein tinman-like Protein	1	A: Orthologues not called in Mnemiopsis; full set absent in Trichoplax
3	17	a	TC012119	TC005224			251	N: NOT CALLED IN AMPHIMEDON/MNEMIOPSIS
3	17	b	TC005224	TC012119		Protein deadpan-like Protein	1	N: NOT CALLED IN AMPHIMEDON/MNEMIOPSIS
3	17	c	TC012851	TC012119		Protein hairy-like Protein	1	N: NOT CALLED IN AMPHIMEDON/MNEMIOPSIS
3	18		TC013519	TC013624		La protein homolog-like Protein	1	N: DUPLICATED PRIOR TO METAZOAN LCA
3	18		TC013624	TC013519			251	N: DUPLICATED PRIOR TO METAZOAN LCA
3	18		TC008844	TC013624			251	N: DUPLICATED PRIOR TO METAZOAN LCA
3	19		TC014014	TC015439		Calcyphosin-like protein	1	A: 8 ANCIENT PARALOGS FOR BOTH TCAST AND MNEMIOPSIS (ENSEMBLCOMPARA)
3	19		TC006493	TC014014		Troponin C, isoform 2-like Protein	2	A: 8 ANCIENT PARALOGS FOR BOTH TCAST AND MNEMIOPSIS (ENSEMBLCOMPARA)
3	19		TC012704	TC014014		Troponin C, isoform 2-like Protein	2	A: 8 ANCIENT PARALOGS FOR BOTH TCAST AND MNEMIOPSIS (ENSEMBLCOMPARA)
3	20	a	TC030639	TC000446		Monocyte to macrophage differentiation factor 2-like Protein	1	A: Appears already duplicated in multiple ctenophores
3	20	b	TC000446	TC030639		Adiponectin receptor protein-like Protein	2	A: Appears already duplicated in multiple ctenophores
3	20	c	TC015429	TC030639		Adiponectin receptor protein-like Protein	2	A: Appears already duplicated in multiple ctenophores
3	21	a	TC032189	TC032760		Fat-like cadherin-related tumor suppressor homolog	2	A: Huge proteins with multiple cadherin domains
3	21	ab	TC032190	TC032760		Fat-like cadherin-related tumor suppressor homolog	2	A: SPLIT GENE
3	21	b	TC012521	TC032189		Starry night	1	A: Huge proteins with multiple cadherin domains
3	22	a	TC016306	TC015013		60S acidic ribosomal protein P0	1	N: Orthologues called in Amphimedon and Mnemiopsis
3	22	b	TC015013	TC016306		60S acidic ribosomal protein P2-like Protein	1	N: Orthologues called in Amphimedon and Mnemiopsis
3	22	c	TC010413	TC016306		60S acidic ribosomal protein P1-like Protein	1	N: Orthologues called in Amphimedon and Mnemiopsis
3	23	a	TC030656	TC004488		TM2 domain-containing protein CG10795-like Protein	1	N: ALREADY DUPLICATED AS A TRIPLET SET IN CHOANOFLAGELLATES
3	23	b	TC004488	TC030656		TM2 domain-containing protein CG11103-like Protein	1	N: ALREADY DUPLICATED AS A TRIPLET SET IN CHOANOFLAGELLATES
3	23	c	TC033771	TC030656		TM2 domain-containing protein almondex-like Protein	1	N: ALREADY DUPLICATED AS A TRIPLET SET IN CHOANOFLAGELLATES
3	24	a	TC005310	TC015520		Chloride channel protein	3	ND
3	24	ab	TC015520	TC005310		Chloride channel protein	3	ND
3	24	b	TC033354	TC005310		Chloride channel protein	3	ND
3	25	a	TC033847	TC005411		Beta-mannosidase-like Protein	3	ND
3	25	a	TC033846	TC005411		Beta-mannosidase-like Protein	3	ND
3	25	a	TC009883	TC005411		Beta-mannosidase-like Protein	3	ND
3	26	a	TC007534	TC015945		Calcineurin subunit B type 2-like Protein	3	ND
3	26	b	TC033266	TC007534		Calcineurin subunit B type 2-like Protein	3	ND
3	26	b	TC009614	TC007534		Calcineurin subunit B type 2-like Protein	3	ND
3	27	a	TC015935	TC003212		Exportin-2-like Protein	1	ND
3	27	b	TC000164	TC003212		Importin-11-like Protein	1	ND
3	27	c	TC001617	TC003212			251	ND
3	28	a	TC005779	TC002441		Peptidylprolyl isomerase	3	ND
3	28	b	TC008405	TC005779		Peptidylprolyl isomerase	3	ND
3	28	c	TC009796	TC005779		Peptidylprolyl isomerase	3	ND
3	29	a	TC000711	TC011159		2-oxoisovalerate dehydrogenase subunit beta, mitochondrial-like Protein	1	ND
3	29	b	TC011159	TC000711		Pyruvate dehydrogenase E1 component subunit beta, mitochondrial-like Protein	1	ND
3	29	c	TC004789	TC000711		Transketolase-like protein 2	1	ND
3	30	a	TC000739	TC000458		Sorting nexin-12-like Protein	1	ND
3	30	b	TC000458	TC000739		Sorting nexin	1	ND
3	30	c	TC008785	TC000739		Sorting nexin-2-like Protein	1	ND
3	31	a	TC000793	TC015171		NADH-cytochrome b5 reductase	2	ND
3	31	b	TC015171	TC000793		NADH-cytochrome b5 reductase	2	ND
3	31	c	TC005424	TC000793		Cytochrome b5 reductase 4-like Protein	1	ND
3	32	a	TC000855	TC001128		Disks large 1 tumor suppressor protein-like Protein	2	ND
3	32	b	TC001128	TC000855			251	ND
3	32	c	TC032079	TC000855		Disks large 1 tumor suppressor protein-like Protein	2	ND
3	33	a	TC000876	TC033666		Kynurenine 3-monooxygenase	1	ND
3	33	b	TC033666	TC000876		Putative ubiquinone biosynthesis monooxygenase COQ6-like Protein	2	ND
3	33	c	TC033665	TC000876		Putative ubiquinone biosynthesis monooxygenase COQ6-like Protein	2	ND
3	34	a	TC001091	TC000379		Transmembrane emp24 domain-containing protein 5-like Protein	1	ND
3	34	b	TC015633	TC001091		Transmembrane emp24 domain-containing protein eca-like Protein	1	ND
3	34	c	TC016304	TC001091			251	ND
3	35	a	TC003307	TC005845		Cytosolic Fe-S cluster assembly factor NUBP1 homolog	1	ND
3	35	b	TC005845	TC003307		Cytosolic Fe-S cluster assembly factor NUBP2 homolog	1	ND
3	35	c	TC001379	TC003307		Cytosolic Fe-S cluster assembly factor NUBP2 homolog-like Protein	1	ND
3	36	a	TC014471	TC011982		O-acyltransferase	3	ND
3	36	ab	TC011982	TC014471		O-acyltransferase	3	ND
3	36	b	TC011849	TC014471		O-acyltransferase	3	ND
3	37	a	TC016126	TC011912		Sideroflexin	2	ND
3	37	ab	TC011912	TC016126		Sideroflexin	2	ND
3	37	b	TC011913	TC016126		Sideroflexin-3-like Protein	1	ND
3	38	a	TC007016	TC007457		RING-box protein 1A-like Protein	3	ND
3	38	ab	TC007457	TC007016		RING-box protein 1A-like Protein	3	ND
3	38	b	TC000384	TC007016		RING-box protein 1A-like Protein	3	ND
3	39		TC004673	TC031254		Fez family zinc finger protein 2-like Protein	1	ND
3	39		TC014373	TC031254		PR domain zinc finger protein 16-like Protein	1	ND
3	39		TC015048	TC031254		Zinc finger protein 98-like Protein	1	ND
3	40		TC004777	TC032116		Carnitine O-palmitoyltransferase 2, mitochondrial-like Protein	1	ND
3	40		TC014006	TC032116		Choline O-acetyltransferase-like Protein	2	ND
3	40		TC002462	TC032116		Choline O-acetyltransferase-like Protein	2	ND
3	41		TC006824	TC032751		POU class 6 homeobox 2	1	ND
3	41		TC003196	TC032751		POU domain protein	2	ND
3	41		TC014350	TC032751		POU domain protein	2	ND
3	42	a	TC034589	TC012416		Supervillin-like protein	1	ND
3	42	b	TC012416	TC034589		Protein flightless-1-like Protein	1	ND
3	42	c	TC004676	TC034589			251	ND
3	43		TC012671	TC033838		Calcium-transporting ATPase	1	ND
3	43		TC031162	TC033838		Cation-transporting ATPase	2	ND
3	43		TC014862	TC033838		Cation-transporting ATPase	2	ND
3	44		TC002492	TC034003		Nucleoside diphosphate kinase	1	ND
3	44		TC010170	TC034003		Nucleoside diphosphate kinase 7-like Protein	1	ND
3	44		TC001111	TC034003		Nucleoside diphosphate kinase homolog 5-like Protein	1	ND
3	45		TC010228	TC034140		Replication factor C 40kD subunit	1	ND
3	45		TC008489	TC034140		Replication factor C subunit 2-like Protein	2	ND
3	45		TC006622	TC034140		Replication factor C subunit 2-like Protein	2	ND
3	46	a	TC006332	TC030784		Alkylglycerone-phosphate synthase	1	ND
3	46	ab	TC030784	TC006332		D-2-hydroxyglutarate dehydrogenase, mitochondrial-like Protein	2	ND
3	46	b	TC002688	TC006332		D-2-hydroxyglutarate dehydrogenase, mitochondrial-like Protein	1	ND
3	47		TC002133	TC034762		Protein arginine N-methyltransferase 7-like Protein	1	ND
3	47		TC008078	TC034762		Putative histone-arginine methyltransferase CARMER-like Protein	2	ND
3	47		TC004581	TC034762		Putative histone-arginine methyltransferase CARMER-like Protein	2	ND
3	48		TC012326	TC011911		GDP-fucose transporter 1-like Protein	1	ND
3	48		TC003642	TC011911		Solute carrier family 35 member C2-like Protein	1	ND
3	48		TC003250	TC011911		UDP-sugar transporter UST74c-like Protein	1	ND
3	49		TC000321	TC011751		RUN and FYVE domain-containing protein 2-like Protein	1	ND
3	49		TC007656	TC011751		Zinc finger FYVE domain-containing protein 1-like Protein	1	ND
3	49		TC012874	TC011751			251	ND
3	50		TC000971	TC014790		Putative E3 ubiquitin-protein ligase HERC1-like Protein	1	ND
3	50		TC012016	TC014790		RCC1 domain-containing protein 1-like Protein	1	ND
3	50		TC031060	TC014790		Regulator of chromosome condensation-like Protein	1	ND
3	51		TC001175	TC015913		Cytosol aminopeptidase-like Protein	2	ND
3	51		TC004000	TC015913		Cytosol aminopeptidase-like Protein	2	ND
3	51		TC012824	TC015913		Putative aminopeptidase W07G4.4-like Protein	1	ND
3	52		TC004696	TC031145		Guanine nucleotide exchange factor DBS-like Protein	1	ND
3	52		TC014788	TC031145		Rho guanine nucleotide exchange factor 7-like Protein	1	ND
3	52		TC003063	TC031145		Triple functional domain protein-like Protein	1	ND
3	53	a	TC013712	TC004938		DNA polymerase	3	ND
3	53	ab	TC004938	TC013712		DNA polymerase	3	ND
3	53	b	TC004992	TC013712		DNA polymerase	3	ND
3	54	a	TC013917	TC014100		Chitinase-like protein Idgf4	2	ND
3	54	a	TC013918	TC014100		Chitinase-like protein Idgf4	2	ND
3	54	b	TC006846	TC014100			251	ND
3	55	a	TC006217	TC015973		WD repeat domain phosphoinositide-interacting protein 2-like Protein	1	ND
3	55	b	TC015973	TC006217		WD repeat domain phosphoinositide-interacting protein 3-like Protein	1	ND
3	55	c	TC001220	TC006217		WD repeat domain phosphoinositide-interacting protein 4-like Protein	1	ND
3	56		TC003810	TC007560		Haloacid dehalogenase-like hydrolase domain-containing protein 2	1	ND
3	56		TC007789	TC007560		Pyridoxal phosphate phosphatase-like Protein	1	ND
3	56		TC031095	TC007560			251	ND
3	57	a	TC008876	TC007693		Protein wech-like Protein	1	ND
3	57	b	TC001677	TC007693		Tripartite motif-containing protein 2-like Protein	1	ND
3	57	c	TC007718	TC007693			251	ND
3	58		TC033521	TC008350		Intron-binding protein aquarius-like Protein	2	ND
3	58		TC033519	TC008350		Intron-binding protein aquarius-like Protein	2	ND
3	58		TC000192	TC008350		Regulator of nonsense transcripts 1 homolog-like Protein	1	ND
3	59		TC010831	TC008860		Tyrosine-protein kinase	3	ND
3	59		TC007809	TC008860		Tyrosine-protein kinase	3	ND
3	59		TC002522	TC008860		Tyrosine-protein kinase	3	ND
3	60		TC001612	TC009298		G protein alpha i subunit-like Protein	1	ND
3	60		TC009299	TC009298		G protein alpha s subunit-like Protein	1	ND
3	60		TC034430	TC009298		Guanine nucleotide-binding protein subunit alpha homolog-like Protein	1	ND
3	61		TC004724	TC009374		Adenylate kinase	1	ND
3	61		TC013739	TC009374		Adenylate kinase isoenzyme 5-like Protein	1	ND
3	61		TC004732	TC009374		UMP-CMP kinase	1	ND
3	62		TC001621	TC009491		Protein no-on-transient A-like Protein	2	ND
3	62		TC006331	TC009491		Protein no-on-transient A-like Protein	2	ND
3	62		TC006356	TC009491			251	ND
3	63		TC011889	TC009720		FGGY carbohydrate kinase domain-containing protein-like Protein	1	ND
3	63		TC003143	TC009720		Putative glycerol kinase 3-like Protein	2	ND
3	63		TC000091	TC009720		Putative glycerol kinase 3-like Protein	2	ND
3	64	a	TC001752	TC015462		Solute carrier family 12 member 8-like Protein	1	ND
3	64	b	TC015462	TC001752		Bumetanide-sensitive sodium-(Potassium)-chloride cotransporter-like Protein	1	ND
3	64	c	TC005178	TC001752		Solute carrier family 12 member 6-like Protein	1	ND
3	65	a	TC002396	TC008565		Putative aarF domain-containing protein kinase 5-like Protein	1	ND
3	65	ab	TC008565	TC002396			251	ND
3	65	b	TC007376	TC002396		Chaperone activity of bc1 complex-like, mitochondrial	1	ND
3	66	a	TC002496	TC003915		Tyrosine 3-monooxygenase-like Protein	1	ND
3	66	ab	TC003915	TC002496		Protein henna-like Protein	2	ND
3	66	b	TC000087	TC002496		Protein henna-like Protein	2	ND
3	67	a	TC002825	TC008173		Regulator of telomere elongation helicase 1 homolog-like Protein	1	ND
3	67	b	TC008173	TC002825		DEAD/H (Asp-Glu-Ala-Asp/His) box polypeptide 11	1	ND
3	67	c	TC007666	TC002825		Regulator of telomere elongation helicase 1	1	ND
3	68	a	TC002915	TC015199		GPN-loop GTPase 2-like Protein	1	ND
3	68	b	TC015199	TC002915		GPN-loop GTPase 3-like Protein	1	ND
3	68	c	TC015364	TC002915		GPN-loop GTPase 1-like Protein	1	ND
3	69	a	TC003450	TC001698		Putative serine protease K12H4.7-like Protein	1	ND
3	69	ab	TC001698	TC003450		Lysosomal Pro-X carboxypeptidase-like Protein	2	ND
3	69	b	TC006303	TC003450		Lysosomal Pro-X carboxypeptidase-like Protein	2	ND
3	70	a	TC003549	TC000534		Pyrroline-5-carboxylate reductase	1	ND
3	70	b	TC000534	TC003549		Pyrroline-5-carboxylate reductase 2-like Protein	1	ND
3	70	c	TC000533	TC003549		Pyrroline-5-carboxylate reductase 3-like Protein	1	ND
3	71	a	TC013377	TC004910		Exostosin-3-like Protein	1	ND
3	71	ab	TC004910	TC013377		Exostosin-2-like Protein	1	ND
3	71	b	TC004758	TC013377		Exostosin-1-like Protein	1	ND
3	72	a	TC003916	TC014151		UDP-N-acetylglucosamine--peptide N-acetylglucosaminyltransferase 110 kDa subunit-like Protein	1	ND
3	72	b	TC003554	TC003916		Intraflagellar transport protein 88 homolog-like Protein	1	ND
3	72	c	TC012544	TC003916		Tetratricopeptide repeat protein 8-like Protein	1	ND
3	73	a	TC004803	TC005515		Dual specificity mitogen-activated protein kinase kinase dSOR1-like Protein	1	ND
3	73	b	TC005515	TC004803		Dual specificity mitogen-activated protein kinase kinase hemipterous-like Protein	1	ND
3	73	c	TC000847	TC004803			251	ND
3	74	a	TC009492	TC030603		F-box/LRR-repeat protein 14-like Protein	1	ND
3	74	a	TC013252	TC030603		F-box/LRR-repeat protein 20-like Protein	1	ND
3	74	a	TC004399	TC030603		F-box/LRR-repeat protein 6-like Protein	1	ND
3	75	a	TC001039	TC032184		ADAM 17-like protease	2	ND
3	75	b	TC001512	TC001039		ADAM 17-like protease	2	ND
3	75	c	TC034399	TC001039			251	ND
3	76	a	TC006216	TC008221		Neuferricin homolog-like Protein	1	ND
3	76	b	TC008221	TC006216		Membrane-associated progesterone receptor component 2-like Protein	1	ND
3	76	c	TC014893	TC006216		Vacuole membrane protein 1-like Protein	1	ND
3	77	a	TC006323	TC009385		STIP1 homology and U box-containing protein 1-like Protein	1	ND
3	77	b	TC007711	TC006323		Mitochondrial import receptor subunit TOM70-like Protein	1	ND
3	77	c	TC030628	TC006323		Tetratricopeptide repeat protein 4-like Protein	1	ND
3	78	a	TC006724	TC008754		Putative ribosomal RNA methyltransferase CG11447-like Protein	1	ND
3	78	b	TC008754	TC006724		Putative tRNA (cytidine(32)/guanosine(34)-2'-O)-methyltransferase	1	ND
3	78	c	TC012032	TC006724		Putative rRNA methyltransferase	1	ND
3	79	a	TC007211	TC011193		Putative asparagine--tRNA ligase, mitochondrial-like Protein	1	ND
3	79	b	TC011193	TC007211		Asparagine--tRNA ligase, cytoplasmic-like Protein	1	ND
3	79	c	TC002857	TC007211		Aspartate--tRNA ligase, cytoplasmic-like Protein	1	ND
3	80	a	TC007251	TC008129		N-alpha-acetyltransferase 20-like Protein	1	ND
3	80	b	TC008129	TC007251		N-alpha-acetyltransferase 30-like Protein	1	ND
3	80	c	TC034643	TC007251		Putative N-acetyltransferase san-like protein	1	ND
3	81	a	TC007618	TC007721		Signal-induced proliferation-associated 1-like protein 2	1	ND
3	81	b	TC011069	TC007618		GTPase-activating Rap/Ran-GAP domain-like protein 3	1	ND
3	81	c	TC034036	TC007618		Rap1 GTPase-activating protein 1-like Protein	1	ND
3	82	a	TC013522	TC007591		Neurobeachin-like Protein	2	ND
3	82	b	TC007591	TC013522		Neurobeachin-like Protein	2	ND
3	82	c	TC000957	TC013522		WD repeat and FYVE domain-containing protein 3-like Protein	1	ND
3	83	a	TC014209	TC010587		Dihydrolipoamide acetyltransferase component of pyruvate dehydrogenase complex	2	ND
3	83	b	TC010587	TC014209		Dihydrolipoyllysine-residue succinyltransferase component of 2-oxoglutarate dehydrogenase complex, mitochondrial-like Protein	1	ND
3	83	c	TC005597	TC014209		Dihydrolipoamide acetyltransferase component of pyruvate dehydrogenase complex	2	ND
3	84	a	TC033787	TC000781		AP-2 complex subunit sigma-like Protein	1	ND
3	84	b	TC000781	TC033787		AP-1 complex subunit sigma-2-like Protein	1	ND
3	84	c	TC008912	TC033787		AP-3 complex subunit sigma-2-like Protein	1	ND
3	85	a	TC000505	TC014465		Importin subunit alpha	3	ND
3	85	ab	TC014465	TC000505		Importin subunit alpha	3	ND
3	85	b	TC000963	TC000505		Importin subunit alpha	3	ND
3	86	a	TC008880	TC010483		Putative inositol monophosphatase 3-like Protein	2	ND
3	86	b	TC003497	TC008880		Putative inositol monophosphatase 3-like Protein	2	ND
3	86	c	TC031402	TC008880		Inositol monophosphatase 1-like Protein	1	ND
3	87	a	TC008220	TC013318		Eukaryotic translation initiation factor 3 subunit F	1	ND
3	87	b	TC013318	TC008220		26S proteasome non-ATPase regulatory subunit 7-like Protein	1	ND
3	87	c	TC002246	TC008220			251	ND
3	88	a	TC008343	TC014005		Calumenin-like Protein	1	ND
3	88	b	TC014005	TC008343		Reticulocalbin-2-like Protein	1	ND
3	88	c	TC014103	TC008343		45 kDa calcium-binding protein-like Protein	1	ND
3	89	a	TC015037	TC030733		Kelch-like protein diablo	3	ND
3	89	a	TC013883	TC030733		Kelch-like protein diablo	3	ND
3	89	a	TC012628	TC030733		Kelch-like protein diablo	3	ND
3	90	a	TC008532	TC013056		Argininosuccinate lyase-like Protein	1	ND
3	90	b	TC013056	TC008532		Fumarate hydratase, mitochondrial-like Protein	1	ND
3	90	c	TC006466	TC008532		Adenylosuccinate lyase	1	ND
3	91	a	TC009819	TC001751		UTP--glucose-1-phosphate uridylyltransferase-like Protein	1	ND
3	91	ab	TC001751	TC009819		UDP-N-acetylhexosamine pyrophosphorylase-like Protein	2	ND
3	91	b	TC005593	TC009819		UDP-N-acetylhexosamine pyrophosphorylase-like Protein	2	ND
3	92	a	TC009481	TC012753		Stromal membrane-associated protein 1-like Protein	1	ND
3	92	b	TC002406	TC009481		ADP-ribosylation factor GTPase-activating protein 1-like Protein	1	ND
3	92	c	TC007817	TC009481		ADP-ribosylation factor GTPase-activating protein 2-like Protein	1	ND
3	93	a	TC005770	TC001676		Kinase	3	ND
3	93	ab	TC001676	TC005770		Kinase	3	ND
3	93	b	TC032797	TC005770		Kinase	3	ND
3	94	a	TC009487	TC015376		Thioredoxin-like protein 1	1	ND
3	94	b	TC015376	TC009487		Thioredoxin	1	ND
3	94	c	TC000058	TC009487		Thioredoxin-1-like Protein	1	ND
3	95	a	TC012587	TC004962		Isocitrate dehydrogenase [NAD] subunit, mitochondrial	2	ND
3	95	ab	TC004962	TC012587		Isocitrate dehydrogenase [NAD] subunit, mitochondrial	2	ND
3	95	b	TC004954	TC012587		Putative isocitrate dehydrogenase [NAD] subunit alpha, mitochondrial-like Protein	1	ND
3	96	a	TC016041	TC006108		Oxysterol-binding protein	2	ND
3	96	b	TC006108	TC016041		Oxysterol-binding protein 1-like Protein	1	ND
3	96	c	TC014227	TC016041		Oxysterol-binding protein	2	ND
3	97	a	TC015424	TC014750		Small nuclear ribonucleoprotein Sm D3-like Protein	2	ND
3	97	ab	TC014750	TC015424		Small nuclear ribonucleoprotein Sm D3-like Protein	2	ND
3	97	b	TC010472	TC015424		Putative small nuclear ribonucleoprotein Sm D1-like Protein	1	ND
3	98	a	TC009798	TC009797		IKK epsilon	1	ND
3	98	b	TC031838	TC009798		Inhibitor of nuclear factor kappa-B kinase subunit beta-like Protein	1	ND
3	98	c	TC035002	TC009798			251	ND
3	99	a	TC008534	TC010778			251	ND
3	99	b	TC010778	TC008534			251	ND
3	99	c	TC031386	TC008534		Cyclic AMP-responsive element-binding protein 3-like protein 2	1	ND
3	100	a	TC009967	TC009613		RAE1 RNA export 1 homolog	1	ND
3	100	b	TC009613	TC009967		WD repeat-containing protein 92-like Protein	1	ND
3	100	c	TC011049	TC009967		Budding uninhibited by benzimidazoles 3	1	ND
3	101	a	TC010010	TC010322		DNA damage-binding protein 1-like Protein	1	ND
3	101	b	TC010322	TC010010		Splicing factor 3B subunit 3-like Protein	1	ND
3	101	c	TC003068	TC010010		Cleavage and polyadenylation specificity factor subunit 1-like Protein	1	ND
3	102	a	TC010122	TC004960		Protein farnesyltransferase subunit beta-like Protein	1	ND
3	102	b	TC004960	TC010122		Geranylgeranyl transferase type-1 subunit beta-like Protein	1	ND
3	102	c	TC001418	TC010122			251	ND
3	103	a	TC010209	TC034816		39S ribosomal protein L39, mitochondrial-like Protein	1	ND
3	103	b	TC034816	TC010209		Threonine--tRNA ligase, cytoplasmic-like protein	1	ND
3	103	c	TC001328	TC010209		Putative proline--tRNA ligase, mitochondrial-like Protein	1	ND
3	104	a	TC010900	TC009573		Transcription initiation factor IIB-like Protein	1	ND
3	104	ab	TC009573	TC010900		Transcription factor IIIB 90 kDa subunit-like Protein	2	ND
3	104	b	TC009572	TC010900		Transcription factor IIIB 90 kDa subunit-like Protein	2	ND
3	105	a	TC015632	TC000759		Mannosyltransferase	3	ND
3	105	b	TC000759	TC015632		Mannosyltransferase	3	ND
3	105	c	TC012991	TC015960		Mannosyltransferase	3	ND
3	106	a	TC033636	TC000042		Bifunctional glutamate/proline--tRNA ligase-like Protein	1	ND
3	106	b	TC000042	TC033636		Putative glutamine--tRNA ligase-like Protein	1	ND
3	106	c	TC013887	TC033636		Putative glutamate--tRNA ligase, mitochondrial-like Protein	1	ND
3	107	a	TC012160	TC001680		Pleckstrin homology domain-containing family A member 8-like Protein	1	ND
3	107	b	TC030665	TC012160		Ceramide-1-phosphate transfer protein-like Protein	1	ND
3	107	c	TC009441	TC012160		Collagen type IV alpha-3-binding protein-like Protein	1	ND
3	108	a	TC011927	TC013884		ATP-binding cassette sub-family F member 3-like Protein	1	ND
3	108	b	TC013884	TC011927		ATP-binding cassette sub-family F member 2-like Protein	1	ND
3	108	c	TC004420	TC011927		ATP-binding cassette sub-family F member 1-like Protein	1	ND
3	109	a	TC011467	TC000297		Protein prenyltransferase alpha subunit repeat-containing protein 1-B-like Protein	1	ND
3	109	b	TC000297	TC011467		Protein farnesyltransferase/geranylgeranyltransferase type-1 subunit alpha-like Protein	1	ND
3	109	c	TC030751	TC011467		Geranylgeranyl transferase type-2 subunit alpha-like Protein	1	ND
3	110	a	TC013690	TC007124		Charged multivesicular body protein 1b-like Protein	1	ND
3	110	b	TC007124	TC012251		Charged multivesicular body protein 2a-like Protein	1	ND
3	110	c	TC012251	TC005451		Charged multivesicular body protein 3-like Protein	1	ND
3	111	a	TC012074	TC006386		Numb	1	ND
3	111	b	TC010167	TC012074		PTB domain-containing adapter protein ced-6-like Protein	1	ND
3	111	b	TC009426	TC012074			251	ND
3	112	a	TC003800	TC034855		DNA ligase	1	ND
3	112	b	TC034855	TC030983		DNA ligase 4-like protein	1	ND
3	112	c	TC012219	TC030983		Ligase4-like protein	1	ND
3	113	a	TC012554	TC001057		Putative U2 small nuclear ribonucleoprotein A'-like Protein	1	ND
3	113	ab	TC001057	TC012554		Leucine-rich repeat-containing protein C10orf11 homolog-like Protein	2	ND
3	113	c	TC000169	TC012554		Leucine-rich repeat-containing protein C10orf11 homolog-like Protein	2	ND
3	114		TC015976	TC013032		Hepatocyte growth factor-regulated tyrosine kinase substrate-like Protein	1	ND
3	114		TC014037	TC013032		Signal transducing adapter molecule 1-like Protein	1	ND
3	114		TC013032	TC014037		WD repeat and FYVE domain-containing protein 2-like Protein	1	ND
3	115		TC014135	TC013573		Dual specificity tyrosine-phosphorylation-regulated kinase 2-like Protein	1	ND
3	115		TC013573	TC007452		Putative dual specificity tyrosine-phosphorylation-regulated kinase 3 homolog-like Protein	1	ND
3	115		TC001529	TC013573			251	ND
3	116	a	TC013995	TC002624		E3 ubiquitin-protein ligase parkin-like Protein	1	ND
3	116	b	TC031432	TC002624		E3 ubiquitin-protein ligase RNF19A-like Protein	1	ND
3	116	c	TC002351	TC002624			251	ND
3	117	a	TC005717	TC001340		Acid phosphatase-like protein 2	1	ND
3	117	b	TC015811	TC001340		Prostatic acid phosphatase-like Protein	1	ND
3	117	c	TC002084	TC001340			251	ND
3	118		TC000130	TC004239		Cytoplasmic dynein 1 intermediate chain-like Protein	1	ND
3	118		TC008686	TC004239		Dynein intermediate chain 2, ciliary-like Protein	1	ND
3	118		TC034331	TC004239			251	ND
3	119	a	TC006471	TC004625		Very long-chain-fatty-acid--CoA ligase bubblegum-like Protein	2	ND
3	119	a	TC014440	TC004625		Very long-chain-fatty-acid--CoA ligase bubblegum-like Protein	2	ND
3	119	b	TC009593	TC004625		Long-chain fatty acid transport protein 4-like Protein	1	ND
3	120	a	TC000365	TC010774		Acetyl-CoA acetyltransferase, mitochondrial-like Protein	1	ND
3	120	b	TC008729	TC000365		3-ketoacyl-CoA thiolase, mitochondrial-like Protein	1	ND
3	120	c	TC008872	TC000365		Trifunctional enzyme subunit beta, mitochondrial-like Protein	1	ND
3	121	a	TC000408	TC033275		Decaprenyl-diphosphate synthase subunit 1-like Protein	1	ND
3	121	b	TC033275	TC000408		Decaprenyl-diphosphate synthase subunit 2-like Protein	1	ND
3	121	c	TC004978	TC000408		Geranylgeranyl pyrophosphate synthase-like Protein	1	ND
3	122	a	TC030661	TC007060		Sorting nexin-13-like Protein	1	ND
3	122	b	TC007060	TC030661		Sorting nexin-25-like Protein	1	ND
3	122	c	TC003152	TC030661		Sorting nexin-14-like Protein	1	ND
3	123	a	TC015323	TC033742		Serine/threonine-protein kinase BRSK2-like Protein	1	ND
3	123	b	TC015081	TC015323		Non-specific serine/threonine protein kinase	1	ND
3	123	b	TC008646	TC015323		SNF1A/AMP-activated protein kinase	1	ND
3	124	a	TC016364	TC013184		S-methyl-5'-thioadenosine phosphorylase	1	ND
3	124	b	TC003914	TC016364		Purine nucleoside phosphorylase	1	ND
3	124	b	TC006907	TC016364			251	ND
3	125	a	TC016414	TC016399		Acyl-CoA Delta(11) desaturase-like Protein	1	ND
3	125	b	TC016399	TC016414		Acyl-CoA desaturase-like Protein	1	ND
3	125	c	TC014819	TC016414		Fatty acid desaturase D7	1	ND
3	126	a	TC031364	TC006853		PHD finger protein 14-like Protein	1	ND
3	126	b	TC006094	TC031364		Peregrin-like Protein	1	ND
3	126	c	TC013701	TC031364			251	ND
3	127	a	TC031508	TC009818		Regulator of G-protein signaling 20-like Protein	1	ND
3	127	b	TC009818	TC031508			251	ND
3	127	c	TC006314	TC031508		Axin	1	ND
2	1	a	TC013453	TC032858	cornichon (cni)	Cornichon	1	I: CHOANOZOAN DUPLICATION (Fig. 4)
2	1	b	TC032858	TC013453	cornichon-related (cnir)	Cornichon-like Protein	1	I: DUPLICATION SHARED ONLY BY BENTHOZOA (Fig. 4)
2	2	a	TC006109	TC004590		14-3-3 protein epsilon-like Protein	1	N: DUPLICATED PRIOR TO METAZOAN LCA
2	2	b	TC004590	TC006109		14-3-3 protein zeta-like Protein	1	N: DUPLICATED PRIOR TO METAZOAN LCA
2	3	a	TC034444	TC012169		ABC transporter G family member 23-like Protein	2	N: NOT CALLED IN AMPHIMEDON/MNEMIOPSIS
2	3	a	TC012512	TC012169		ABC transporter G family member 23-like Protein	2	N: NOT CALLED IN AMPHIMEDON/MNEMIOPSIS
2	4	a	TC004781	TC000567		Ubiquilin-1-like Protein	2	N: NOT CALLED IN AMPHIMEDON/MNEMIOPSIS
2	4	a	TC010440	TC000567		Ubiquilin-1-like Protein	2	N: NOT CALLED IN AMPHIMEDON/MNEMIOPSIS
2	5	a	TC034898	TC001166		Putative isoaspartyl peptidase/L-asparaginase CG7860-like protein	1	A: Draft MrBayes tree asparaginase_v02 unclear; possible loss
2	5	b	TC007572	TC001166		Putative N(4)-(Beta-N-acetylglucosaminyl)-L-asparaginase CG1827-like Protein	1	A: Draft MrBayes tree asparaginase_v02 unclear; possible loss
2	6	a	TC009914	TC030910		Band 7 protein CG42540-like Protein	2	N: IS CALLED IN AMPHIMEDON/MNEMIOPSIS; candidate family after MP/NJ analyses in MEGA
2	6	b	TC003971	TC009914		Band 7 protein CG42540-like Protein	2	N: NOT CALLED IN AMPHIMEDON/MNEMIOPSIS; IN Pleurobranchia so already duplicated in ctenophores
2	7	a	TC002494	TC003908		Cycle protein	1	A: MISSING IN AMPHIMEDON; DUPLICATED ONLY IN TC?
2	7	b	TC032705	TC003908		Protein cycle-like Protein	1	A: MISSING IN AMPHIMEDON; DUPLICATED ONLY IN TC?
2	8	a	TC009772	TC007536		Adipokinetic hormone receptor	1	N: NOT CALLED IN AMPHIMEDON/MNEMIOPSIS
2	8	b	TC001245	TC007536		Cardioacceleratory peptide receptor-like Protein	1	N: NOT CALLED IN AMPHIMEDON/MNEMIOPSIS
2	9	a	TC002490	TC007923		Ubiquitin carboxyl-terminal hydrolase	2	N: DUPLICATED PRIOR TO METAZOAN LCA
2	9	a	TC009963	TC007923		Ubiquitin carboxyl-terminal hydrolase	2	N: DUPLICATED PRIOR TO METAZOAN LCA
2	10	a	TC007671	TC008156		Alkylated DNA repair protein alkB homolog 8-like Protein	1	A: DUPLICATED IN EUMETAZOA? DRAFT MP100 TREE UNCLEAR
2	10	b	TC000790	TC008156		Alpha-ketoglutarate-dependent dioxygenase alkB homolog 6-like Protein	1	A: DUPLICATED IN EUMETAZOA? DRAFT MP100 TREE UNCLEAR
2	11	a	TC003373	TC008188		Protein peanut-like Protein	1	N: DUPLICATED PRIOR TO METAZOAN LCA
2	11	b	TC014984	TC008188		Septin-1-like Protein	1	N: DUPLICATED PRIOR TO METAZOAN LCA
2	12	a	TC006900	TC008319		60S ribosome subunit biogenesis protein NIP7 homolog	1	A: Possible candidate; needs tree work
2	12	b	TC033819	TC008319		Cyclin-dependent kinases regulatory subunit	1	A: Possible candidate; needs tree work
2	13	a	TC004387	TC008515		MOB kinase activator-like 1	1	N: DUPLICATED PRIOR TO METAZOAN LCA
2	13	b	TC012571	TC008515		MOB kinase activator-like 4	1	N: DUPLICATED PRIOR TO METAZOAN LCA
2	14	a	TC000041	TC008518		Leukocyte receptor cluster member 8 homolog-like Protein	1	A: Duplicated in Eumetazoa?
2	14	b	TC000231	TC008518		Protein xmas-2-like Protein	1	A: Duplicated in Eumetazoa?
2	15	a	TC004964	TC000184		Mitochondrial pyruvate carrier	2	N: COULDN'T FIND IN CTENOPHORES; short peptide
2	15	a	TC000184	TC004964		Mitochondrial pyruvate carrier	2	N: COULDN'T FIND IN CTENOPHORES; short peptide
2	16		TC005204	TC003149		Drebrin-like protein	2	N: DUPLICATED PRIOR TO METAZOAN LCA
2	16		TC003149	TC005204		Drebrin-like protein	2	N: DUPLICATED PRIOR TO METAZOAN LCA
2	17		TC002501	TC009258		CCR4-NOT transcription complex subunit 3-like Protein	1	N: DUPLICATED PRIOR TO METAZOAN LCA
2	17		TC009258	TC002501		Regulator of gene activity-like Protein	1	N: DUPLICATED PRIOR TO METAZOAN LCA
2	18		TC014109	TC000127		DNA-directed RNA polymerase II subunit RPB7-like Protein	1	N: DUPLICATED PRIOR TO METAZOAN LCA
2	18		TC000127	TC014109		DNA-directed RNA polymerase III subunit RPC8-like Protein	1	N: DUPLICATED PRIOR TO METAZOAN LCA
2	19	a	TC000051	TC015749		Diphthamide biosynthesis protein 1-like Protein	1	N: DUPLICATED PRIOR TO METAZOAN LCA
2	19	b	TC015749	TC000051		Diphthamide biosynthesis protein 2-like Protein	1	N: DUPLICATED PRIOR TO METAZOAN LCA
2	20	a	TC000040	TC009259		cAMP-dependent protein kinase type I regulatory subunit-like Protein	1	N: DUPLICATED PRIOR TO METAZOAN LCA
2	20	b	TC009259	TC000040		cAMP-dependent protein kinase type II regulatory subunit-like Protein	1	N: DUPLICATED PRIOR TO METAZOAN LCA
2	21	a	TC009885	TC031209		Translin	1	N: DUPLICATED PRIOR TO METAZOAN LCA (Euk. Duplication)
2	21	b	TC031209	TC009885		Translin-associated protein X-like Protein (Trax)	1	N: DUPLICATED PRIOR TO METAZOAN LCA
2	22	a	TC003192	TC000161		SURF1-like protein	1	N: Duplicated prior to metazoan LCA
2	22	b	TC000161	TC003192		Surfeit locus protein 4 homolog-like Protein	1	N: Duplicated prior to metazoan LCA
2	23	a	TC011177	TC000525		ELMO domain-containing protein 1-like Protein	1	A: Not called in Mnemiopsis
2	23	b	TC002742	TC011177		Engulfment and cell motility protein 1-like Protein	1	A: Not called in Mnemiopsis
2	24	a	TC001383	TC001036		Cell division cycle protein 20 homolog-like Protein	1	N: Duplicated prior to metazoan LCA
2	24	b	TC001036	TC001383		Fizzy-related protein homolog-like Protein	1	N: Duplicated prior to metazoan LCA
2	25		TC007507	TC004316		Breast cancer metastasis-suppressor 1-like protein	1	A: Ambiguous, possible candidate; needs more tree work
2	25		TC004316	TC007507		Sin3 histone deacetylase corepressor complex component SDS3-like Protein	1	A: Ambiguous, possible candidate; needs more tree work
2	26		TC034845	TC006604		Vacuolar protein sorting-associated protein 11 homolog-like protein	1	N: Compagen Oscarella --> 0.0 and 1e-91 E-values
2	26		TC006604	TC034845		Vacuolar protein sorting-associated protein 18 homolog-like Protein	1	N: Neurobase P-bachei --> 1e-100 and 1e-96 E-values
2	27		TC014105	TC002349		48 related 1	1	A: Not called in Mnemiopsis or Amphimedon (Myc-type bHLH)
2	27		TC002349	TC013785			251	A: Not called in Mnemiopsis or Amphimedon (Myc-type bHLH)
2	28		TC031742	TC012388		Armadillo repeat-containing protein 4-like Protein	1	N: Already duplicated in both Amphimedon and Mnemiopsis
2	28		TC012388	TC031742		Armadillo-1	1	N: Already duplicated in both Amphimedon and Mnemiopsis
2	29		TC008245	TC001566		Cleft lip and palate transmembrane protein 1 homolog-like Protein	1	N: Already duplicated in both Amphimedon and Mnemiopsis
2	29		TC001566	TC008245		Cleft lip and palate transmembrane protein 1-like protein	1	N: Already duplicated in both Amphimedon and Mnemiopsis
2	30		TC015179	TC015756		Spermidine synthase-like Protein	1	A: Many orthologues called in Amphimedon but NOT Mnemiopsis
2	30		TC015756	TC015179		Spermine synthase-like Protein	1	A: Orthologs NOT called in either Amphimedon or Mnemiopsis
2	31		TC007177	TC032389		Syntaxin 13	1	N: Orthologues NOT called in either Amphimedon or Mnemiopsis
2	31		TC032389	TC007177		Syntaxin-7-like Protein	1	N: Orthologues NOT called in either Amphimedon or Mnemiopsis
2	32		TC014023	TC001032		Polo	1	N: Already duplicated in both Amphimedon and Mnemiopsis
2	32		TC001032	TC014023		Serine/threonine-protein kinase PLK4-like Protein	1	N: Already duplicated in both Amphimedon and Mnemiopsis
2	33		TC008332	TC008832		Mesoderm induction early response protein 3-like Protein	1	N: Called in Mnemiopsis BUT NOT Amphimedon --> NJ tree says this is a secondary gene loss based on choano (S. rosetta) outgroup
2	33		TC008832	TC008332		Metastasis-associated protein MTA1-like Protein	1	N: Called in both Mnemiopsis AND Amphimedon
2	34		TC013143	TC009210		Cannonball	1	A: Called in both Amphimedon and Mnemiopsis
2	34		TC009210	TC013143		TAF5-like RNA polymerase II p300/CBP-associated factor-associated factor 65 kDa subunit 5L	1	A: Called in Amphimedon BUT NOT Mnemiopsis; weak homology between Tcast paralogs
2	35		TC012674	TC012650		Crossveinless 2	1	A: None called in Amphimedon; 6 called in Mnemiopsis
2	35		TC012650	TC012674		Short-gastrulation	1	A: None called in Amphimedon; 4 called in Mnemiopsis
2	36		TC014564	TC001438		Adenosylhomocysteinase	2	N: Called in both Mnemiopsis and Amphimedon --> NJ & MP trees say both paralogs present in Pleurobachia ctenophore
2	36		TC001438	TC014564		Adenosylhomocysteinase	2	N: Called in Amphimedon BUT NOT Mnemiopsis
2	37		TC016223	TC000617		Adrenodoxin-like protein, mitochondrial	2	N: Orthologues called in both Amphimedon and Mnemiopsis
2	37		TC000617	TC016223		Adrenodoxin-like protein, mitochondrial	2	N: Orthologues called in both Amphimedon and Mnemiopsis
2	38		TC010614	TC008606		Amino acid transporter	2	ND
2	38		TC008606	TC010614		Amino acid transporter	2	ND
2	39		TC012117	TC010798		AP-2 complex subunit alpha-like Protein	2	ND
2	39		TC010798	TC012117		AP-2 complex subunit alpha-like Protein	2	ND
2	40		TC014364	TC013019		Aspartate aminotransferase	2	ND
2	40		TC013019	TC014364		Aspartate aminotransferase	2	ND
2	41		TC011255	TC002977		BAI1-associated protein 3-like Protein	2	ND
2	41		TC002977	TC011255		BAI1-associated protein 3-like Protein	2	ND
2	42		TC012278	TC007397		Calreticulin-like Protein	2	ND
2	42		TC007397	TC012278		Calreticulin-like Protein	2	ND
2	43		TC016122	TC004647		Carboxypeptidase A	2	ND
2	43		TC015532	TC005500		Carboxypeptidase A	2	ND
2	44		TC006260	TC005723		COP9 signalosome complex subunit 4-like Protein	2	ND
2	44		TC005723	TC006260		COP9 signalosome complex subunit 4-like Protein	2	ND
2	45	a	TC005371	TC014276		C-terminal-binding protein-like Protein	2	ND
2	45	b	TC013082	TC005371		C-terminal-binding protein-like Protein	2	ND
2	46		TC014208	TC013405		Cysteine protease	2	ND
2	46		TC013405	TC014208		Cysteine protease	2	ND
2	47		TC009744	TC006653		Derlin	2	ND
2	47		TC006653	TC009744		Derlin	2	ND
2	48		TC007344	TC006688		DNA topoisomerase	2	ND
2	48		TC006688	TC007344		DNA topoisomerase	2	ND
2	49	a	TC032353	TC001580		WD repeat-containing protein 47-like Protein	2	ND
2	49	b	TC001580	TC032353		WD repeat-containing protein 47-like Protein	2	ND
2	50		TC030588	TC004370		Ethanolamine kinase-like Protein	2	ND
2	50		TC004370	TC030588		Ethanolamine kinase-like Protein	2	ND
2	51		TC008142	TC003573		Histone acetyltransferase	2	ND
2	51		TC003573	TC008142		Histone acetyltransferase	2	ND
2	52		TC013938	TC013552		O-glucosyltransferase rumi-like Protein	2	ND
2	52		TC013552	TC013938		O-glucosyltransferase rumi-like Protein	2	ND
2	53		TC015660	TC013727		Protein l(2)37Cc-like Protein	2	ND
2	53		TC013727	TC015660		Protein l(2)37Cc-like Protein	2	ND
2	54		TC030607	TC002652		Protein shuttle craft-like Protein	2	ND
2	54		TC002652	TC030607		Protein shuttle craft-like Protein	2	ND
2	55	a	TC008732	TC012622		Putative 2-oxoglutarate dehydrogenase E1 component DHKTD1 homolog, mitochondrial-like Protein	2	ND
2	55	b	TC030624	TC008732		Putative 2-oxoglutarate dehydrogenase E1 component DHKTD1 homolog, mitochondrial-like Protein	2	ND
2	56		TC007521	TC003711		Putative arginine--tRNA ligase, cytoplasmic-like Protein	2	ND
2	56		TC003711	TC007521		Putative arginine--tRNA ligase, cytoplasmic-like Protein	2	ND
2	57		TC014776	TC008035		Putative multidrug resistance-associated protein lethal(2)03659-like Protein	2	ND
2	57		TC008035	TC013752		Putative multidrug resistance-associated protein lethal(2)03659-like Protein	2	ND
2	58		TC030695	TC010648		Putative small nuclear ribonucleoprotein G-like Protein	2	ND
2	58		TC010648	TC030695		Putative small nuclear ribonucleoprotein G-like Protein	2	ND
2	59		TC009268	TC004364		RNA-binding protein fusilli-like Protein	2	ND
2	59		TC004364	TC009268		RNA-binding protein fusilli-like Protein	2	ND
2	60		TC015193	TC012184		RuvB-like helicase	2	ND
2	60		TC012184	TC015193		RuvB-like helicase	2	ND
2	61		TC013859	TC005166		Succinate-CoA ligase subunit beta	2	ND
2	61		TC005166	TC013859		Succinate-CoA ligase subunit beta	2	ND
2	62		TC030541	TC004829		tRNA pseudouridine synthase	2	ND
2	62		TC004829	TC030541		tRNA pseudouridine synthase	2	ND
2	63		TC015810	TC010640		Serine-arginine protein 55-like Protein	2	ND
2	63		TC012868	TC010640		Serine-arginine protein 55-like Protein	2	ND
2	64		TC031408	TC011039		Acid sphingomyelinase-like phosphodiesterase 3b	1	ND
2	64		TC005858	TC011039		Sphingomyelin phosphodiesterase	1	ND
2	65	a	TC032111	TC015407		Alpha-1,3-glucosyltransferase	2	ND
2	65	b	TC015407	TC032111		Alpha-1,3-glucosyltransferase	2	ND
2	66	a	TC011256	TC001256		Kanadaptin-like Protein	1	ND
2	66	b	TC033580	TC001256			251	ND
2	67	a	TC004246	TC001392			251	ND
2	67	a	TC005276	TC001392			251	ND
2	68	a	TC008954	TC003968		Beta-1,3-galactosyltransferase brn-like Protein	1	ND
2	68	b	TC008953	TC003968		Hexosyltransferase	1	ND
2	69	a	TC013394	TC004801		Endophilin-A-like Protein	1	ND
2	69	b	TC014503	TC004801			251	ND
2	70		TC007324	TC011182		60S ribosomal protein L10a-2-like Protein	1	ND
2	70		TC012019	TC011182		H/ACA ribonucleoprotein complex subunit 2-like protein	1	ND
2	71		TC006940	TC011406			251	ND
2	71		TC006941	TC011406			251	ND
2	72		TC014950	TC011515		DNA repair protein REV1-like Protein	1	ND
2	72		TC009742	TC011515			251	ND
2	73		TC010027	TC011676		Copper chaperone for superoxide dismutase-like Protein	1	ND
2	73		TC007011	TC011676		Superoxide dismutase [Cu-Zn]	1	ND
2	74		TC007227	TC015653		Synaptotagmin	1	ND
2	74		TC011462	TC015653		Synaptotagmin IV	1	ND
2	75	a	TC033870	TC005521		Phosphodiesterase	2	ND
2	75	a	TC002545	TC005521		Phosphodiesterase	2	ND
2	76	a	TC001970	TC006044		Exonuclease 1-like Protein	1	ND
2	76	b	TC009261	TC006044		Flap endonuclease 1	1	ND
2	77	a	TC032206	TC006324		PI-PLC X domain-containing protein 1-like Protein	2	ND
2	77	a	TC032207	TC006324		PI-PLC X domain-containing protein 1-like Protein	2	ND
2	78		TC012481	TC011859		Putative methyltransferase NSUN5-like Protein	1	ND
2	78		TC011896	TC011859		Putative ribosomal RNA methyltransferase NOP2-like Protein	1	ND
2	79	a	TC000583	TC001941		B(0,+)-type amino acid transporter 1-like Protein	2	ND
2	79	a	TC003203	TC001941		B(0,+)-type amino acid transporter 1-like Protein	2	ND
2	80		TC030691	TC012205		Protein abnormal spindle-like Protein	1	ND
2	80		TC032835	TC012205			251	ND
2	81		TC034804	TC005087		FAS-associated factor 1-like protein	1	ND
2	81		TC005087	TC034804			251	ND
2	82		TC005831	TC034529		GTPase Era, mitochondrial-like Protein	1	ND
2	82		TC034529	TC005831		tRNA modification GTPase GTPBP3, mitochondrial-like protein	1	ND
2	83	a	TC002710	TC007574		Exosome complex component RRP42-like Protein	1	ND
2	83	a	TC008282	TC007574		Exosome complex component RRP43-like Protein	1	ND
2	84	a	TC031960	TC034512		Furin-like protease 2	1	ND
2	84	b	TC002816	TC031960		Membrane-bound transcription factor site-1 protease-like Protein	1	ND
2	85	a	TC034449	TC032420		Polypyrimidine tract-binding protein 1-like Protein	1	ND
2	85	b	TC002855	TC034449		Heterogeneous nuclear ribonucleoprotein L-like Protein	1	ND
2	86	a	TC011857	TC034423		Serine--pyruvate aminotransferase	1	ND
2	86	b	TC000542	TC011857		Phosphoserine aminotransferase	1	ND
2	87		TC014590	TC012855		Isocitrate dehydrogenase [NADP]	2	ND
2	87		TC011647	TC012855		Isocitrate dehydrogenase [NADP]	2	ND
2	88		TC013393	TC012908		Dolichyldiphosphatase 1-like Protein	1	ND
2	88		TC011538	TC012908		Palmitoyl-protein thioesterase 1-like Protein	1	ND
2	89		TC030636	TC013055		TLD domain-containing protein 1-like Protein	1	ND
2	89		TC015511	TC013055			251	ND
2	90		TC005951	TC013064		DnaJ homolog subfamily C member 28-like Protein	2	ND
2	90		TC005774	TC013064		DnaJ homolog subfamily C member 28-like Protein	2	ND
2	91		TC000158	TC033770		Polynucleotide 5'-hydroxyl-kinase NOL9-like Protein	1	ND
2	91		TC033770	TC000158		Protein CLP1 homolog	1	ND
2	92		TC007223	TC013148		Polypeptide N-acetylgalactosaminyltransferase	2	ND
2	92		TC005479	TC013148		Polypeptide N-acetylgalactosaminyltransferase	2	ND
2	93		TC034859	TC013368		MORN repeat-containing protein 3-like protein	1	ND
2	93		TC007855	TC013368		Radial spoke head 1 homolog-like Protein	1	ND
2	94		TC001563	TC013542		Transmembrane 9 superfamily member	1	ND
2	94		TC033199	TC013542		Transmembrane 9 superfamily member 4-like Protein	1	ND
2	95		TC001761	TC014040		Calcium uptake protein 1 homolog, mitochondrial-like Protein	2	ND
2	95		TC009934	TC014040		Calcium uptake protein 1 homolog, mitochondrial-like Protein	2	ND
2	96		TC010420	TC014137		Dynamin-like 120 kDa protein, mitochondrial	1	ND
2	96		TC011058	TC014137		Dynamin-like Protein	1	ND
2	97		TC014882	TC014410		Guanine nucleotide-binding protein subunit beta-1-like Protein	2	ND
2	97		TC008821	TC014410		Guanine nucleotide-binding protein subunit beta-1-like Protein	2	ND
2	98		TC000998	TC014860		Moesin/ezrin/radixin homolog 1-like Protein	2	ND
2	98		TC016331	TC014860		Moesin/ezrin/radixin homolog 1-like Protein	2	ND
2	99		TC013861	TC032136		Elongation of very long chain fatty acids protein	2	ND
2	99		TC011121	TC032136		Elongation of very long chain fatty acids protein	2	ND
2	100		TC032729	TC032258		Phosphoinositide phospholipase C	2	ND
2	100		TC032801	TC032258		Phosphoinositide phospholipase C	2	ND
2	101		TC002663	TC014314		Leucine-rich repeat-containing protein 15-like Protein	1	ND
2	101		TC001607	TC014314		Leucine-rich repeats and immunoglobulin-like domains protein 3	1	ND
2	102		TC034530	TC014374		Eukaryotic translation initiation factor 2-alpha kinase-like protein	1	ND
2	102		TC004776	TC014374		Membrane-associated tyrosine-and threonine-specific cdc2-inhibitory kinase-like Protein	1	ND
2	103		TC011551	TC014705		Serine/threonine-protein kinase Genghis Khan-like Protein	1	ND
2	103		TC033419	TC014705			251	ND
2	104		TC002803	TC014741		Transcriptional repressor scratch 1-like Protein	1	ND
2	104		TC007234	TC014741		Zinc finger protein 143-like Protein	1	ND
2	105		TC014774	TC030673		Histone acetyltransferase KAT2A-like Protein	1	ND
2	105		TC030765	TC030673			251	ND
2	106		TC007732	TC030679		Thymidylate synthase-like Protein	1	ND
2	106		TC004238	TC030679			251	ND
2	107		TC010479	TC030763		Acetyl-coenzyme A synthetase	1	ND
2	107		TC008000	TC030763		Acyl-CoA synthetase family member 4 homolog-like Protein	1	ND
2	108		TC012120	TC031748		Proteasome-associated protein ECM29 homolog-like Protein	1	ND
2	108		TC006821	TC031748			251	ND
2	109		TC015302	TC032913		2-methoxy-6-polyprenyl-1,4-benzoquinol methylase, mitochondrial	1	ND
2	109		TC008471	TC032913		Juvenile hormone acid O-methyltransferase	1	ND
2	110		TC003327	TC004512		1-acylglycerophosphocholine O-acyltransferase 1-like Protein	1	ND
2	110		TC004512	TC003327		Glycerol-3-phosphate acyltransferase 4-like Protein	1	ND
2	111	a	TC016320	TC033310		1-acyl-sn-glycerol-3-phosphate acyltransferase delta-like Protein	1	ND
2	111	b	TC007781	TC016320		Acyl-CoA:lysophosphatidylglycerol acyltransferase 1-like Protein	1	ND
2	112	a	TC006375	TC003322		26S proteasome non-ATPase regulatory subunit 6-like Protein	1	ND
2	112	b	TC003322	TC006375		COP9 signalosome complex subunit 1b-like Protein	1	ND
2	113	a	TC033777	TC011085		28S ribosomal protein S11, mitochondrial-like Protein	1	ND
2	113	b	TC011085	TC033777		40S ribosomal protein S14-like Protein	1	ND
2	114	a	TC009847	TC007364		28S ribosomal protein S5, mitochondrial-like Protein	1	ND
2	114	b	TC007364	TC009847		40S ribosomal protein S2-like Protein	1	ND
2	115	a	TC006605	TC003367		28S ribosomal protein S7, mitochondrial-like Protein	1	ND
2	115	b	TC003367	TC006605		40S ribosomal protein S5a-like Protein	1	ND
2	116	a	TC002716	TC001317		28S ribosomal protein S9, mitochondrial-like Protein	1	ND
2	116	b	TC001317	TC002716		40S ribosomal protein S16-like Protein	1	ND
2	117	a	TC004386	TC002948		2-oxoisovalerate dehydrogenase subunit alpha, mitochondrial-like Protein	1	ND
2	117	b	TC002948	TC004386		Pyruvate dehydrogenase E1 component subunit alpha	1	ND
2	118	a	TC015061	TC013609		AP-2 complex subunit beta-like Protein	1	ND
2	118	b	TC013609	TC015061		AP-3 complex subunit beta-2-like Protein	1	ND
2	119		TC007491	TC004462		40S ribosomal protein S12, mitochondrial-like Protein	1	ND
2	119		TC004462	TC007491		40S ribosomal protein S23-like Protein	1	ND
2	120	a	TC010438	TC002140		DNA-directed RNA polymerase II subunit RPB3-like Protein	1	ND
2	120	b	TC014519	TC002140		DNA-directed RNA polymerases I and III subunit RPAC1-like Protein	1	ND
2	121	a	TC013340	TC008315		5-aminolevulinate synthase	1	ND
2	121	b	TC008315	TC013340		Serine palmitoyltransferase 2-like Protein	1	ND
2	122		TC015509	TC006628		Ankyrin repeat domain-containing protein 13C-like Protein	1	ND
2	122		TC006628	TC015509		Ankyrin repeat domain-containing protein 13D-like Protein	1	ND
2	123		TC008818	TC031185		Serine/threonine-protein phosphatase 2A 56 kDa regulatory subunit delta isoform-like Protein	1	ND
2	123		TC031185	TC008818		Serine/threonine-protein phosphatase 2A 56 kDa regulatory subunit epsilon isoform-like Protein	1	ND
2	124		TC010417	TC005725		Aconitate hydratase	1	ND
2	124		TC005725	TC010417		Aconitate hydratase, mitochondrial	1	ND
2	125		TC014376	TC013455		Ankyrin-3-like Protein	1	ND
2	125		TC013455	TC030911			251	ND
2	126	a	TC009187	TC002888		HSPB1-associated protein 1-like Protein	1	ND
2	126	b	TC000138	TC002888		Lysine-specific demethylase 8-like Protein	1	ND
2	127	a	TC006378	TC003241		Transporter	2	ND
2	127	a	TC006379	TC003241		Transporter	2	ND
2	128		TC002628	TC011004		Cap-specific mRNA (Nucleoside-2'-O-)-methyltransferase 1-like Protein	1	ND
2	128		TC011004	TC002628		Cap-specific mRNA (Nucleoside-2'-O-)-methyltransferase 2-like Protein	1	ND
2	129		TC033566	TC007615		CWF19-like protein 1 homolog	1	ND
2	129		TC007615	TC033566		CWF19-like protein 2 homolog	1	ND
2	130	a	TC033574	TC000797		Diacylglycerol kinase	1	ND
2	130	b	TC032491	TC033574		Diacylglycerol kinase eta-like Protein	1	ND
2	131		TC013876	TC008408		Eukaryotic translation initiation factor 4 gamma 1-like Protein	1	ND
2	131		TC008408	TC013876		Eukaryotic translation initiation factor 4 gamma 2-like Protein	1	ND
2	132	a	TC005405	TC001377		Exosome complex component RRP40-like Protein	1	ND
2	132	b	TC001377	TC005405		Exosome complex component RRP4-like Protein	1	ND
2	133		TC009086	TC009927		E3 ubiquitin-protein ligase AMFR-like Protein	1	ND
2	133		TC009927	TC009086		E3 ubiquitin-protein ligase HRD1-like Protein	1	ND
2	134		TC006501	TC006773		E3 ubiquitin-protein ligase RBBP6-like Protein	1	ND
2	134		TC006773	TC006501		Zinc finger CCHC domain-containing protein 24-like Protein	1	ND
2	135		TC034139	TC007984		Acyl carrier protein	1	ND
2	135		TC007984	TC034139		Zinc finger protein 593 homolog-like Protein	1	ND
2	136		TC011535	TC008421		Acyl-protein thioesterase 1-like Protein	1	ND
2	136		TC008421	TC011535		Lysophospholipase-like protein 1	1	ND
2	137		TC003201	TC010418		Queuine tRNA-ribosyltransferase accessory subunit 2	1	ND
2	137		TC010418	TC003201		Queuine tRNA-ribosyltransferase catalytic subunit 1	1	ND
2	138		TC010924	TC002777		Ras-related GTP-binding protein A-like Protein	1	ND
2	138		TC002777	TC010924		Ras-related GTP-binding protein C-like Protein	1	ND
2	139		TC002574	TC007993		Signal recognition particle 54 kDa protein-like Protein	1	ND
2	139		TC007993	TC002574		Signal recognition particle receptor subunit alpha homolog-like Protein	1	ND
2	140	a	TC014173	TC003519		Bifunctional arginine demethylase and lysyl-hydroxylase PSR-like Protein	1	ND
2	140	b	TC001767	TC003519			251	ND
2	141		TC005764	TC008773		Structural maintenance of chromosomes 6	1	ND
2	141		TC008773	TC005764		Structural maintenance of chromosomes protein 5-like Protein	1	ND
2	142		TC010177	TC033325		Synaptosomal-associated protein	1	ND
2	142		TC033325	TC010177		Synaptosomal-associated protein 29-like Protein	1	ND
2	143	a	TC007772	TC003655		Serine/threonine-protein kinase RIO1	1	ND
2	143	b	TC005306	TC003655		Serine/threonine-protein kinase RIO3-like Protein	1	ND
2	144		TC010769	TC005357		Tetratricopeptide repeat protein 39B-like Protein	1	ND
2	144		TC005357	TC010769		Tetratricopeptide repeat protein 39C-like Protein	1	ND
2	145		TC002933	TC009054		U1 small nuclear ribonucleoprotein 70 kDa-like Protein	1	ND
2	145		TC009054	TC002933		U11/U12 small nuclear ribonucleoprotein 35 kDa protein-like Protein	1	ND
2	146		TC002590	TC005767		Ubiquitin conjugation factor E4 A-like Protein	1	ND
2	146		TC005767	TC002590		Ubiquitin conjugation factor E4 B-like Protein	1	ND
2	147		TC031477	TC014571		UPF0235 protein C15orf40 homolog-like Protein	1	ND
2	147		TC014571	TC031477		UPF0428 protein CG16865-like Protein	1	ND
2	148		TC004451	TC011939		Vacuolar protein sorting-associated protein 13C-like Protein	1	ND
2	148		TC011939	TC004440		Vacuolar protein sorting-associated protein 13D-like Protein	1	ND
2	149		TC013872	TC014972		Vacuolar protein sorting-associated protein 37A-like Protein	1	ND
2	149		TC014972	TC013872		Vacuolar protein sorting-associated protein 37B-like Protein	1	ND
2	150	a	TC001086	TC011944		Supernumerary limbs	1	ND
2	150	b	TC006451	TC001086		Archipelago	1	ND
2	151	a	TC005617	TC009474		DNA mismatch repair protein Mlh1-like Protein	1	ND
2	151	b	TC002932	TC005617		Mismatch repair endonuclease PMS2-like Protein	1	ND
2	152	a	TC012524	TC034455		Equilibrative nucleoside transporter 3-like Protein	2	ND
2	152	ab	TC008473	TC012524		Equilibrative nucleoside transporter 3-like Protein	2	ND
2	153		TC031492	TC000177		Sorting nexin-17-like Protein	1	ND
2	153		TC000177	TC031492		Sorting nexin-27-like Protein	1	ND
2	154		TC012162	TC008488		Exportin-1-like Protein	1	ND
2	154		TC008488	TC012162		Exportin-5-like Protein	1	ND
2	155		TC031089	TC004857		Exportin-4-like Protein	1	ND
2	155		TC004857	TC031089		Ran-binding protein 16-like Protein	1	ND
2	156		TC014435	TC013676		Alpha-methylacyl-CoA racemase-like Protein	1	ND
2	156		TC013676	TC014435		Succinate--hydroxymethylglutarate CoA-transferase-like Protein	1	ND
2	157	a	TC034263	TC013642		Metabotropic glutamate receptor-like Protein	2	ND
2	157	b	TC001106	TC034263		Metabotropic glutamate receptor-like Protein	2	ND
2	158		TC034042	TC006450		DIS3-like exonuclease 2	1	ND
2	158		TC006450	TC034042		Exosome complex exonuclease RRP44-like Protein	1	ND
2	159		TC013060	TC014562		Aspartate--tRNA ligase, mitochondrial-like Protein	1	ND
2	159		TC014562	TC013060		Lysine--tRNA ligase	1	ND
2	160		TC009202	TC003619		ATP-dependent zinc metalloprotease YME1 homolog-like Protein	1	ND
2	160		TC003619	TC009202		Paraplegin-like Protein	1	ND
2	161		TC009490	TC034383		Beta-chimaerin-like Protein	1	ND
2	161		TC034383	TC009490		Rho GTPase-activating protein 100F-like Protein	1	ND
2	162		TC006205	TC032344		B9 domain-containing protein 1-like Protein	1	ND
2	162		TC032344	TC006205			251	ND
2	163		TC015857	TC015933		Beta-ureidopropionase-like Protein	1	ND
2	163		TC015933	TC015857		Nitrilase and fragile histidine triad fusion protein NitFhit-like Protein	1	ND
2	164		TC009857	TC004616		BSD domain-containing protein 1-like Protein	1	ND
2	164		TC004616	TC009857		Synapse-associated protein 1-like Protein	1	ND
2	165	a	TC015066	TC001360		Vinculin-like Protein	1	ND
2	165	b	TC004609	TC015066		Catenin alpha-like Protein	1	ND
2	166		TC010433	TC009183		Dolichyl-diphosphooligosaccharide--protein glycosyltransferase subunit STT3A-like Protein	1	ND
2	166		TC009183	TC010433		Dolichyl-diphosphooligosaccharide--protein glycosyltransferase subunit STT3B-like Protein	1	ND
2	167		TC013381	TC014663		EF-hand domain-containing family member C2-like Protein	1	ND
2	167		TC014663	TC013381		EF-hand domain-containing protein 1-like Protein	1	ND
2	168		TC008371	TC000304		Glutaredoxin	1	ND
2	168		TC000304	TC008371		Glutaredoxin 3-like Protein	1	ND
2	169		TC030615	TC009084		HemK methyltransferase family member 1-like Protein	1	ND
2	169		TC009084	TC030615		HemK methyltransferase family member 2-like Protein	1	ND
2	170		TC011316	TC033750		Iron-sulfur cluster assembly 1 homolog, mitochondrial-like Protein	1	ND
2	170		TC033750	TC011316		Iron-sulfur cluster assembly 2 homolog, mitochondrial-like Protein	1	ND
2	171		TC015057	TC005610		Lysophospholipid acyltransferase 5-like Protein	1	ND
2	171		TC005610	TC015057		Lysophospholipid acyltransferase 7-like Protein	1	ND
2	172	a	TC000827	TC008871		Held out wings	1	ND
2	172	b	TC011081	TC008871		Splicing factor 1-like Protein	1	ND
2	173		TC011382	TC004408		Cell division cycle 5-like protein	1	ND
2	173		TC004408	TC011382			251	ND
2	174		TC008273	TC031204		Choline/ethanolaminephosphotransferase 1-like Protein	1	ND
2	174		TC031204	TC008273		Ethanolaminephosphotransferase 1-like Protein	1	ND
2	175		TC011817	TC001074		Chromosomal serine/threonine-protein kinase JIL-1-like Protein	1	ND
2	175		TC001074	TC011817		Ribosomal protein S6 kinase	1	ND
2	176		TC011519	TC014286		COP9 signalosome complex subunit 3-like Protein	1	ND
2	176		TC014286	TC011519		Putative 26S proteasome non-ATPase regulatory subunit 3-like Protein	1	ND
2	177	a	TC011311	TC009623		Homeobox protein extradenticle-like Protein	1	ND
2	177	b	TC006040	TC009623			251	ND
2			TC033633	TC008704		Cystathionine beta-synthase	1	ND
2			TC010650	TC008410		Cytoplasmic tRNA 2-thiolation protein 1	1	ND
2			TC005934	TC008030		Deoxynucleoside kinase-like Protein	1	ND
2			TC032546	TC006106		DNA-directed RNA polymerases I, II, and III subunit RPABC5-like Protein	1	ND
2			TC007833	TC009073		Dolichyl-phosphate beta-glucosyltransferase-like Protein	1	ND
2			TC009745	TC009102		Dynein light chain Tctex-type-like Protein	1	ND
2			TC009895	TC031865		G patch domain-containing protein 4-like Protein	1	ND
2			TC031284	TC011652		G protein-coupled receptor kinase 1-like Protein	1	ND
2			TC005879	TC003637		Galactokinase-like Protein	1	ND
2			TC002405	TC013571		Gamma-soluble NSF attachment protein-like Protein	1	ND
2			TC002995	TC013390		Glycosyltransferase 25 family member-like Protein	1	ND
2			TC000335	TC030578		GRAM domain-containing protein 1B-like Protein	1	ND
2			TC013110	TC012443		Growth hormone-inducible transmembrane protein-like Protein	1	ND
2			TC015211	TC006390		Guanine nucleotide-binding protein subunit beta-like protein 1	1	ND
2			TC015216	TC014393		Hippocampus abundant transcript 1 protein-like Protein	1	ND
2			TC012099	TC012300		Hsp70-binding protein 1-like Protein	1	ND
2			TC006551	TC013516		Inactive rhomboid protein 1-like Protein	1	ND
2			TC032394	TC005506		Intersectin-2-like Protein	1	ND
2			TC006692	TC006977		Intraflagellar transport protein 140 homolog-like Protein	1	ND
2			TC015986	TC032169		Lethal giant larvae	1	ND
2			TC032169	TC015986		Lethal(2) giant larvae protein-like Protein	1	ND
2			TC015534	TC032227		Leucine-rich repeat-containing protein 47-like Protein	1	ND
2			TC031747	TC001254		Low molecular weight phosphotyrosine protein phosphatase 2-like Protein	1	ND
2			TC008704	TC033633		L-threonine dehydratase catabolic TdcB-like Protein	1	ND
2			TC006779	TC005987		Luc7-like protein 3	1	ND
2			TC011953	TC004876		Macrophage erythroblast attacher-like Protein	1	ND
2			TC011005	TC011468		Male-specific lethal 3 homolog-like Protein	1	ND
2			TC013543	TC032730		Methylcrotonoyl-CoA carboxylase subunit alpha, mitochondrial-like Protein	1	ND
2			TC012898	TC003582		Midasin	1	ND
2			TC009780	TC015505		Minor histocompatibility antigen H13-like Protein	1	ND
2			TC033800	TC004013		MIP18 family protein CG30152-like Protein	1	ND
2			TC004013	TC033800		MIP18 family protein CG7949-like Protein	1	ND
2			TC007790	TC000626		Mitochondrial amidoxime reducing component 2-like Protein	1	ND
2			TC001561	TC031655		Mitochondrial inner membrane protein COX18-like Protein	1	ND
2			TC004828	TC009984		MKI67 FHA domain-interacting nucleolar phosphoprotein-like	1	ND
2			TC000626	TC007790		Molybdenum cofactor sulfurase	1	ND
2			TC014175	TC008169		Multiple coagulation factor deficiency protein 2 homolog-like Protein	1	ND
2			TC003637	TC005879		N-acetylgalactosamine kinase-like Protein	1	ND
2			TC014601	TC015607		N-acetylglucosaminyl-phosphatidylinositol biosynthetic protein-like Protein	1	ND
2			TC008030	TC005934		NADH dehydrogenase [ubiquinone] 1 alpha subcomplex subunit 10, mitochondrial	1	ND
2			TC008190	TC015420		N-alpha-acetyltransferase 16, NatA auxiliary subunit-like Protein	1	ND
2			TC013928	TC012368		Nanchung	1	ND
2			TC014443	TC007123		Neuroguidin-A-like Protein	1	ND
2			TC011468	TC011005		NuA4 complex subunit EAF3 homolog-like Protein	1	ND
2			TC012300	TC012099		Nucleotide exchange factor SIL1-like Protein	1	ND
2			TC011262	TC031499		Oo18 RNA-binding protein	1	ND
2			TC015420	TC008190		Phagocyte signaling-impaired protein-like Protein	1	ND
2			TC002130	TC005404		Phosducin-like protein	1	ND
2			TC011920	TC012312		Phosphoacetylglucosamine mutase-like Protein	1	ND
2			TC012312	TC011920		Phosphoglucomutase-2-like Protein	1	ND
2			TC005330	TC002990		Phosphoribosyl pyrophosphate synthase-associated protein 2-like Protein	1	ND
2			TC012213	TC012786		PIH1 domain-containing protein 1-like Protein	1	ND
2			TC031865	TC009895		PIN2/TERF1-interacting telomerase inhibitor 1-like Protein	1	ND
2			TC009984	TC004828		Polyadenylate-binding protein 2-like Protein	1	ND
2			TC003248	TC012252		Presqualene diphosphate phosphatase-like Protein	1	ND
2			TC030591	TC010335		Probable tRNA N6-adenosine threonylcarbamoyltransferase, mitochondrial	1	ND
2			TC013390	TC002995		Procollagen-lysine,2-oxoglutarate 5-dioxygenase 3-like Protein	1	ND
2			TC013479	TC012751		Protein catecholamines up-like Protein	1	ND
2			TC012786	TC012213		Protein kintoun-like Protein	1	ND
2			TC001325	TC014470		Protein preli-like	1	ND
2			TC004876	TC011953		Protein RMD5 homolog A-like Protein	1	ND
2			TC033656	TC001034		Protein SDE2 homolog-like Protein	1	ND
2			TC014470	TC001325		Protein slowmo-like Protein	1	ND
2			TC032829	TC008446		Protein YIPF	1	ND
2			TC008446	TC032829		Protein YIPF5-like Protein	1	ND
2			TC011240	TC011557		Protein-associating with the carboxyl-terminal domain of ezrin-like Protein	1	ND
2			TC011652	TC031284		Protein-serine/threonine kinase	1	ND
2			TC014142	TC014218		Pseudouridine synthase	1	ND
2			TC012443	TC013110		Putative Bax inhibitor 1-like Protein	1	ND
2			TC005604	TC005605		Putative deoxycytidylate deaminase-like Protein	1	ND
2			TC009073	TC007833		Putative dolichol-phosphate mannosyltransferase-like Protein	1	ND
2			TC001254	TC031747		Putative peptidyl-tRNA hydrolase PTRHD1-like Protein	1	ND
2			TC011106	TC010176		Putative phenylalanine--tRNA ligase alpha subunit-like Protein	1	ND
2			TC032227	TC015534		Putative phenylalanine--tRNA ligase beta subunit-like Protein	1	ND
2			TC010176	TC011106		Putative phenylalanine--tRNA ligase, mitochondrial-like Protein	1	ND
2			TC007200	TC014794		Putative phosphorylase b kinase regulatory subunit alpha-like Protein	1	ND
2			TC014794	TC007200		Putative phosphorylase b kinase regulatory subunit beta-like Protein	1	ND
2			TC008835	TC006755		Putative Rho GTPase-activating protein CG5521-like Protein	1	ND
2			TC005987	TC006779		Putative RNA-binding protein Luc7-like 2	1	ND
2			TC031499	TC011262		Putative RNA-binding protein orb2-like Protein	1	ND
2			TC007973	TC033579		Putative trafficking protein particle complex subunit 2-like Protein	1	ND
2			TC010335	TC030591		Putative tRNA N6-adenosine threonylcarbamoyltransferase-like Protein	1	ND
2			TC007479	TC005718		Putative Ufm1-specific protease 2-like Protein	1	ND
2			TC032730	TC013543		Pyruvate carboxylase	1	ND
2			TC007497	TC007846		Rab GDP dissociation inhibitor	1	ND
2			TC007846	TC007497		Rab proteins geranylgeranyltransferase component A-like Protein	1	ND
2			TC003004	TC003699		Retinoblastoma-binding protein 5 homolog-like Protein	1	ND
2			TC012652	TC001759		Rho guanine nucleotide exchange factor 10-like Protein	1	ND
2			TC013516	TC006551		Rhomboid-like protein	1	ND
2			TC002990	TC005330		Ribose-phosphate pyrophosphokinase 1-like Protein	1	ND
2			TC006106	TC032546		Ribosomal protein L32	1	ND
2			TC006313	TC012891		Ribosome biogenesis protein BMS1 homolog-like Protein	1	ND
2			TC013451	TC013256		Ribosome biogenesis protein WDR12 homolog	1	ND
2			TC014218	TC014142		RNA pseudouridylate synthase domain-containing protein 1-like Protein	1	ND
2			TC032943	TC004104		rRNA-processing protein FCF1 homolog-like Protein	1	ND
2			TC011557	TC011240		SCY1-like protein 2	1	ND
2			TC015505	TC009780		Signal peptide peptidase-like 3	1	ND
2			TC013571	TC002405		Soluble NSF attachment protein-like Protein	1	ND
2			TC007123	TC014443		Something about silencing protein 10-like Protein	1	ND
2			TC012252	TC003248		Sphingosine-1-phosphate phosphatase 1-like Protein	1	ND
2			TC001034	TC033656		Splicing factor 3A subunit 3-like Protein	1	ND
2			TC031227	TC010403		Splicing factor U2af 38 kDa subunit-like Protein	1	ND
2			TC011815	TC001711		Syntenin-1-like Protein	1	ND
2			TC031135	TC015680		Tankyrase-like Protein	1	ND
2			TC009546	TC003001		TBC1 domain family member 31-like Protein	1	ND
2			TC008239	TC011606		Tetratricopeptide repeat protein 17-like Protein	1	ND
2			TC011974	TC010637		THO complex subunit 4-like Protein	1	ND
2			TC033579	TC007973		Trafficking protein particle complex subunit 2-like protein	1	ND
2			TC007153	TC001478		Trafficking protein particle complex subunit 4-like Protein	1	ND
2			TC011734	TC008959		Transcription factor RFX3-like Protein	1	ND
2			TC001068	TC002852		Transcription initiation factor TFIID subunit 13-like Protein	1	ND
2			TC002852	TC001068		Transcription initiation protein SPT3 homolog-like Protein	1	ND
2			TC006390	TC015211		Transducin beta-like protein 3	1	ND
2			TC016342	TC013308		Tryptophan--tRNA ligase, cytoplasmic-like Protein	1	ND
2			TC013308	TC016342		Tryptophan--tRNA ligase, mitochondrial-like Protein	1	ND
2			TC006755	TC008835		Tuberin-like Protein	1	ND
2			TC010403	TC031227		U2 small nuclear ribonucleoprotein auxiliary factor 35 kDa subunit-related protein 2-like Protein	1	ND
2			TC015638	TC001544		U6 snRNA-associated Sm-like protein LSm8	1	ND
[truncated: 323 more rows]
